# Supplementary material
Source: PubMed Central journal article supplement (PMC4776449)
Supplement: pnas.1519680113.sapp.pdf [file pnas.1519680113.sapp.pdf]

## Supporting Information Appendix

### **Inside the closed complex of class I terpene synthases: identifying universal structural features governing catalysis**

**Patrick Schrepfer<sup>1</sup>, Alexander Büttner<sup>1</sup>, Christian Görner<sup>1</sup>, Michael Hertel<sup>1</sup>, Frank Wallrapp<sup>2</sup>, Wolfgang Eisenreich<sup>3</sup>, Volker Sieber<sup>4</sup>, Robert Kourist<sup>5</sup> & Thomas Brück<sup>1\*</sup>**

<sup>1</sup> Department for Industrial Biocatalysis, Technische Universität München, Lichtenbergstr. 4, 85748 Garching, Germany

<sup>2</sup> Department for Bioinformatics and Computational Biology, Technische Universität München, Boltzmannstraße 3, 85748 Garching, Germany

<sup>3</sup> Chair of Biochemistry, Technische Universität München, Lichtenbergstr. 4, 85748 Garching, Germany

<sup>4</sup> Chair of Chemistry of Biogenic Resources, Technische Universität München, Schulgasse 16, 94315 Straubing, Germany <sup>5</sup>Junior Research Group for Microbial Biotechnology, Ruhr-Universität Bochum, Universitätsstraße 150, 44780 Bochum, Germany

## Content

|                                                                                                     |    |
|-----------------------------------------------------------------------------------------------------|----|
| General experimental procedures                                                                     | 4  |
| Bacterial strains, genes and vectors                                                                | 5  |
| Genes and vectors used for <i>in vitro</i> production of taxa-4,11-diene                            | 5  |
| Genes and vectors used for <i>in vivo</i> production of taxa-4,11-diene                             | 5  |
| Site directed mutagenesis                                                                           | 5  |
| Table S1: Plasmids used to construct the overexpressed DXP pathway in <i>E. coli</i> BL21(DE3)      | 6  |
| Table S2: Plasmids used to construct taxadiene biosynthesis in <i>E. coli</i> BI21(DE3)             | 6  |
| Fig. S1a: Closed conformation of TXS harboring productive GGPP                                      | 7  |
| Fig. S1b: Structural superposition of BPPS and TXS                                                  | 8  |
| Fig. S1c: Structural superposition of the H-bond donor amino acid network of BPPS and TXS           | 9  |
| Fig. S1d: Structural superposition of eukaryotic mono- and diterpene synthases                      | 10 |
| Fig. S1e: Structural superposition of bacterial and fungal sesqui- and diterpene synthases with TXS | 11 |
| Fig. S1f: Structural superposition of TXS with the open conformation of CBTS from <i>N. tabacum</i> | 12 |
| Fig. S1g: Reaction catalysed by CBTS                                                                | 12 |
| Fig. S1h: Closed conformation homology model of CBTS harboring GGPP                                 | 13 |
| Fig. S2: Induced fit mechanism in TXS                                                               | 14 |
| Fig. S3a: Molecular docking of QM-derived cation A into TXS                                         | 15 |
| Fig. S3b: TXS harboring the GGPP conformation derived from the crystal structure                    | 16 |
| Fig. S3c: Manually built cation C and molecular docking of QM-derived cation C in TXS               | 16 |
| Fig. S3d: Structural superposition of TXS cation C with TXS-V584L cation C                          | 17 |
| Fig. S3e: Manually built cation F and molecular docking of QM-derived cation F in TXS               | 18 |
| Fig. S3f: Manually built cation D1 and molecular docking of QM-derived cation D1 in TXS             | 19 |
| Fig. S3g: Manually built cation D2 and molecular docking of QM-derived cation D2 in TXS             | 19 |
| Fig. S3h: TXS-V584M/L harboring cation F                                                            | 20 |
| Fig. S3i: TXS-Y841F and TXS-S587A harboring cation B                                                | 20 |
| Fig. S3j: TXS-Y841F and TXS-S587A harboring cation C                                                | 21 |
| Fig. S4: Amino acid-assisted stabilization of cations                                               | 22 |
| Fig. S5a: TXS-cation C and -F complexes harboring 7-fluoro-GGPP-derived cations C and F             | 23 |
| Fig. S5b: Product distribution of TXS incubated with 7-fluoro-GGPP                                  | 24 |
| Fig. S6: Representation of unproductive docking cluster                                             | 25 |
| Fig. S7a: Proposed mechanism for the formation of cyclooctat-9-en-7-ol                              | 26 |
| Fig. S7b: CotB2 harboring the proposed cation 8 and -9                                              | 27 |
| Fig. S7c: CotB2 harboring GGPP and cations A and B                                                  | 28 |
| Fig. S7d: CotB2 harboring cations C and D                                                           | 29 |
| Fig. S7e: CotB2 harboring cations E and F                                                           | 30 |
| Fig. S7f: CotB2 harboring the proposed cation E <sup>5</sup>                                        | 31 |
| Fig. S7g: Proposed molecular basis for the recently generated CotB2 mutants 1 <sup>6</sup>          | 32 |
| Fig. S7h: Proposed molecular basis for the recently generated CotB2 mutants 2 <sup>6,7</sup>        | 33 |

|                                                                                              |    |
|----------------------------------------------------------------------------------------------|----|
| <b>Fig. S8a: GC-chromatograms of wild type and mutant TXS variants</b>                       | 35 |
| <b>Fig. S8b: CD-spectra of CM, (+)-cembrene and V</b>                                        | 35 |
| <b>Fig. S8c: MS-Spectra of deprotonated intermediates CM, V, V1, V2, T and T1</b>            | 36 |
| <b>Fig. S8d: HR-MS-Spectra of deprotonated intermediates CM, V, V1 and V2</b>                | 37 |
| <b>Fig. S8e: NMR spectral data of CM</b>                                                     | 38 |
| <b>Fig. S8f: 13-C Spectrum of CM</b>                                                         | 39 |
| <b>Fig. S8g: 1-H Spectrum of CM</b>                                                          | 39 |
| <b>Fig. S9a: NMR Spectral data of V</b>                                                      | 41 |
| <b>Fig. S9b: 13-C Spectrum of V</b>                                                          | 41 |
| <b>Fig. S9c: 1H-Spectrum of V</b>                                                            | 42 |
| <b>Fig. S9d: HSQC Spectrum of V</b>                                                          | 42 |
| <b>Fig. S9e: HMBC Spectrum of V</b>                                                          | 43 |
| <b>Fig. S9f: COSY Spectrum of V</b>                                                          | 43 |
| <b>Fig. S9g: TOCSY Spectrum of V</b>                                                         | 44 |
| <b>Fig. S9h: NOESY Spectrum of V</b>                                                         | 45 |
| <b>Fig. S10a: GC-FID Spectra of batch bioprocess supernatants of TXS-W753H and TXS-V584M</b> | 46 |
| <b>Fig. S10b: Batch bioprocess characteristics of TXS-W753H and TXS-V584M</b>                | 46 |
| <b>Table S3: Cluster analyses of docked QM-carbocations</b>                                  | 47 |
| <b>Table S4: Characterization of TXS and mutants</b>                                         | 50 |
| <b>Table S5: Mutagenesis Primer</b>                                                          | 53 |
| <b>Gene of 1-deoxy-D-xylulose 5-phosphate synthase (<i>dxs</i>)</b>                          | 55 |
| <b>Gene of 1-deoxy-D-xylulose 5-phosphate reductoisomerase (<i>dxr</i>)</b>                  | 55 |
| <b>Gene of bi-cistronic <i>ispD/ispF</i></b>                                                 | 56 |
| <b>Gene of Isopentenyl-diphosphate delta isomerase (<i>idi</i>)</b>                          | 57 |
| <b>Gene of the M60 truncation of TXS (<i>txs</i>)</b>                                        | 58 |
| <b>References</b>                                                                            | 59 |

## General experimental procedures

All chemicals were obtained from standard sources at the highest purity grade. NMR spectra were recorded in  $\text{CDCl}_3$  with an Avance-III 500 MHz device (Bruker) at 300 K.  $^1\text{H}$  NMR chemical shifts are given in ppm relative to  $\text{CHCl}_3$  ( $\delta=7.26$  ppm) or  $\text{CD}_2\text{HOD}$  ( $\delta=3.31$  ppm) and  $\text{CD}_3\text{OH}$  ( $\delta=4.87$ ) ( $^1\text{H}$  NMR).  $^{13}\text{C}$  NMR chemical shifts are given in ppm relative to  $\text{CDCl}_3$  at  $\delta=77.16$  ppm or  $\text{CD}_3\text{OH}$  at  $\delta=49.00$  ppm. The 2D experiments (HSQC, HMBC, TOCSY, COSY and NOESY) were performed using standard Bruker pulse sequences and parameters.

GC-MS and GC-FID analysis of diterpene products from n-hexane extractions was conducted by a Trace GC Ultra with DSQII (Thermo Scientific). One  $\mu\text{l}$  sample was applied by TriPlus AS onto a SGE BPX5 column (30 m, I.D 0.25 mm, Film 0.25  $\mu\text{m}$ ). The initial column temperature was 50°C (maintained for 2.5 min). A temperature gradient was applied from 50°C – 320°C (10 °C/min), followed by 3 min maintenance at 320°C. MS data were recorded at 70 eV (EI),  $m/z$  (rel. intensity in %) as TIC, total ion current. The recorded  $m/z$  range was 50 – 650. Quantification was performed with flame ionization detector (FID) using 1 mg mL<sup>-1</sup>  $\alpha$ -humulene (Sigma-Aldrich, Germany) as an internal standard.

High-resolution mass spectra of diterpenes were determined with a Thermo Scientific DFS Magnetic Sector GC-HRMS system from n-hexane extractions. One  $\mu\text{l}$  sample was applied by TriPlus AS onto a SGE BPX5 column (30 m, I.D 0.25 mm, Film 0.25  $\mu\text{m}$ ). The initial column temperature was 50°C (maintained for 2.5 min). A temperature gradient was applied from 50°C – 320°C (10 °C min<sup>-1</sup>), followed by 3 min maintenance at 320°C. The recorded  $m/z$  range was 50 – 650.

Circular dichroism (CD) spectroscopy was performed using a Chirascan plus spectropolarimeter (Applied Photophysics, United Kingdom). Samples were dissolved in acetonitrile and spectra were recorded in quartz cuvettes with 0.1 cm path length at 20 °C.

Glycerol content of the fed-batch bioprocess was quantified by HPLC, using an Agilent LC 1100 system (Agilent technologies, Waldbronn, Germany), equipped with an autosampler, column oven and a Shodex RI-101 detector (Showa Denko Europe GmbH, Munich). A Rezex ROA-Organic Acid H+ (8%) ion-exclusion column (300 mm, 7.8 mm internal diameter; Phenomenex LTD, Aschaffenburg, Germany) was used for the isocratic separation with 5 mM sulfuric acid at a flow rate of 0.5 ml min<sup>-1</sup> at 70°C.



## Bacterial strains, genes and vectors

The *E. coli* strains XL-1 Blue and BL21(DE3) were used for cloning and diterpene production. All strains and plasmids were obtained from Novagen/Merck Millipore (Germany). Genes were synthesized by Life technologies GmbH (Thermo Fisher Scientific) featuring the appropriate restriction sites and adjusting codon usage for *E. coli*.

### Genes and vectors used for *in vitro* production of taxa-4,11-diene

pET28b (+) vector was used for cloning and recombinant expression of a codon optimized version of the M60 truncation of taxadiene synthase from *Taxus brevifolia* (henceforth designated "TXS").<sup>1</sup> The Gene of taxadiene synthase (*txs*) (GenBank: AF326519.1) (**See Genes section**) was synthesized as M60 truncation including an NdeI restriction site at the 5'- and an XhoI restriction site at the 3'-end. The synthetic gene was introduced into the corresponding restriction site of pET28b (+) vector by standard cloning techniques.

### Genes and vectors used for *in vivo* production of taxa-4,11-diene

The 1-deoxy-D-xylulose 5-phosphate (DXP) pathway was housed by the plasmids pColaDuet-1 and pCDFDuet-1, while the taxadiene biosynthesis genes were carried by the pETDuet-1 plasmid. To overexpress the DXP pathway in *E. coli* BL21(DE3), genes from *E. coli* of the 1-deoxy-D-xylulose 5-phosphate synthase (*dxs*) (GenBank: YP\_001461602.1) (**See Genes section**), 1-deoxy-D-xylulose 5-phosphate reductoisomerase (*dxr*) (GenBank: NP\_414715.1) (**See Genes section**), 2-C-methyl-D-erythriol 4-phosphate cytidyltransferase synthase (*ispD*) (GenBank: NP\_417227.1) (**See Genes section**), 2-C-methyl-D-erythritol 2,4-cyclodiphosphate synthase (*ispF*) (GenBank: NP\_289295.1) (**See Genes section**) and Isopentenyl-diphosphate delta isomerase (*idi*) (GenBank: NP\_417365.1) (**See Genes section**) were synthesized. *IspD/ispF* was created as a bi-cistronic operon (**See Genes section**). The synthetic genes were introduced into the appropriate plasmids according to **Table S1** by standard cloning techniques. To achieve biosynthesis of taxadiene and its deprotonated intermediates the native geranylgeranyl diphosphate synthase (*crtE*) (GenBank: M90698.1) was amplified from *Pantoea agglomerans* (ATCC 27155) using standard protocols. Primers used were 5'-AAA CCA TGG CAA TGG CAA CGG TCT GCG CA-3' and 5'-AAA GAA TTC TTA ACT GAC GGC AGC GAG TTT-3'. The genes of *crtE* and synthetic *txs* were introduced into the appropriate plasmids according to **Table S2** by standard cloning techniques.

### Site directed mutagenesis

Mutation primers were designed applying the Agilent Technologies QuikChange program (Table S4). For PCR the following mixture was used: 5 µL Pfu Ultra buffer (10x, Agilent), 1 µL forward/ reverse primer (2 µM stock) (**Table S5**), 1 µL dNTPs (10 µM stock), 200 ng template DNA (plasmid), 1 µL Pfu Cx Hotstart polymerase (Agilent) and

water to a final volume of 50  $\mu$ L. After the PCR reaction, 2  $\mu$ L of DpnI (20 u, NEB) were added and the mixture was incubated at 37 °C for at least 2 h. 2  $\mu$ L of sample were transformed into XL1 blue competent cells (Agilent). After 1 h of incubation at 37 °C in SOB medium, cells were streaked out on LB (lysogeny broth)-kanamycin or in case of the *in vivo* approach -ampicillin agar plates. Colonies were grown overnight at 37°C. Single colonies were picked and inoculated in LB-kanamycin or -ampicillin medium overnight. Plasmids were isolated applying a plasmid miniprep kit (Agilent). The mutant TXS genes were verified via sequencing (MWG Eurofins, Ebersberg) using the T7 forward/T7 reverse primer set in case of pET28b (+) or DuetUp2 (Novagen)/T7 reverse primer set in case of pET duet vector.

**Table S1: Plasmids used to construct the overexpressed DXP pathway in *E. coli* BL21(DE3)**

| <i>Gene(s)</i>          | <i>Vector</i> | <i>Multiple Cloning Site</i> | <i>Restriction Sites</i> |
|-------------------------|---------------|------------------------------|--------------------------|
| <i>dxr</i>              | pColaDuet-1   | I                            | <i>NcoI, EcoRI</i>       |
| <i>dxs</i>              | pColaDuet-1   | II                           | <i>NdeI, XhoI</i>        |
| <i>ispD/ispF</i> operon | pCDFDuet-1    | I                            | <i>NcoI, EcoRI</i>       |
| <i>idi</i>              | pCDFDuet-1    | II                           | <i>NdeI, XhoI</i>        |

**Table S2: Plasmids used to construct taxadiene biosynthesis in *E. coli* BL21(DE3)**

| <i>Gene(s)</i> | <i>Vector</i> | <i>Multiple Cloning Site</i> | <i>Restriction Sites</i> |
|----------------|---------------|------------------------------|--------------------------|
| <i>crtE</i>    | pET-Duet-1    | I                            | <i>NcoI, EcoRI</i>       |
| <i>txs</i>     | pET-Duet-1    | II                           | <i>NdeI, XhoI</i>        |

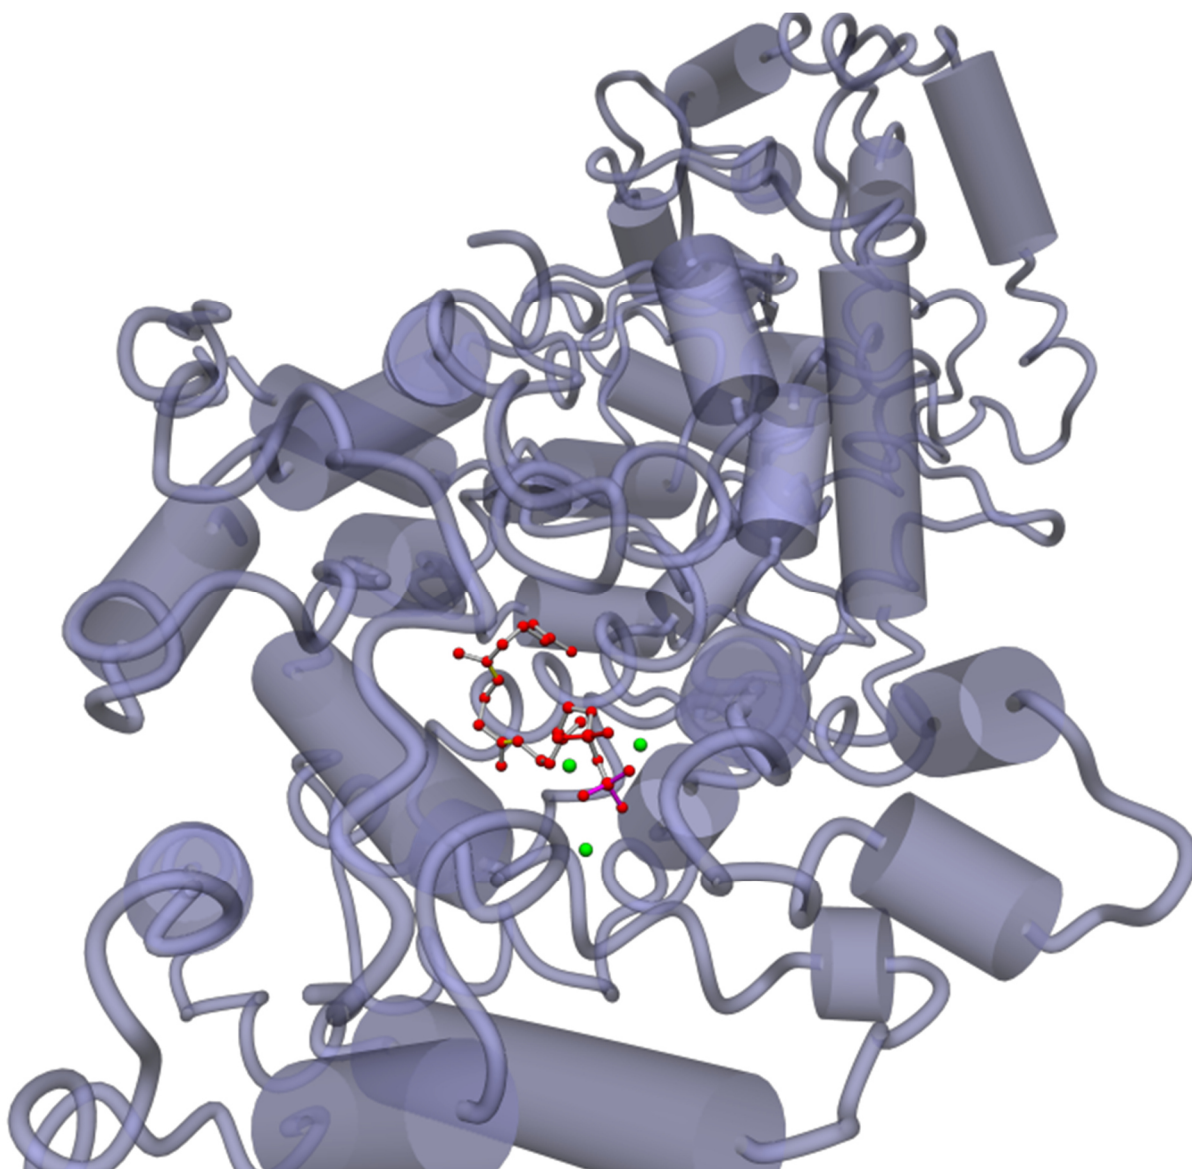

**Fig. S1a: Closed conformation of TXS harboring productive GGPP**

Closed conformation of TXS harboring productive **GGPP** (red). Magnesium ions are shown in green.

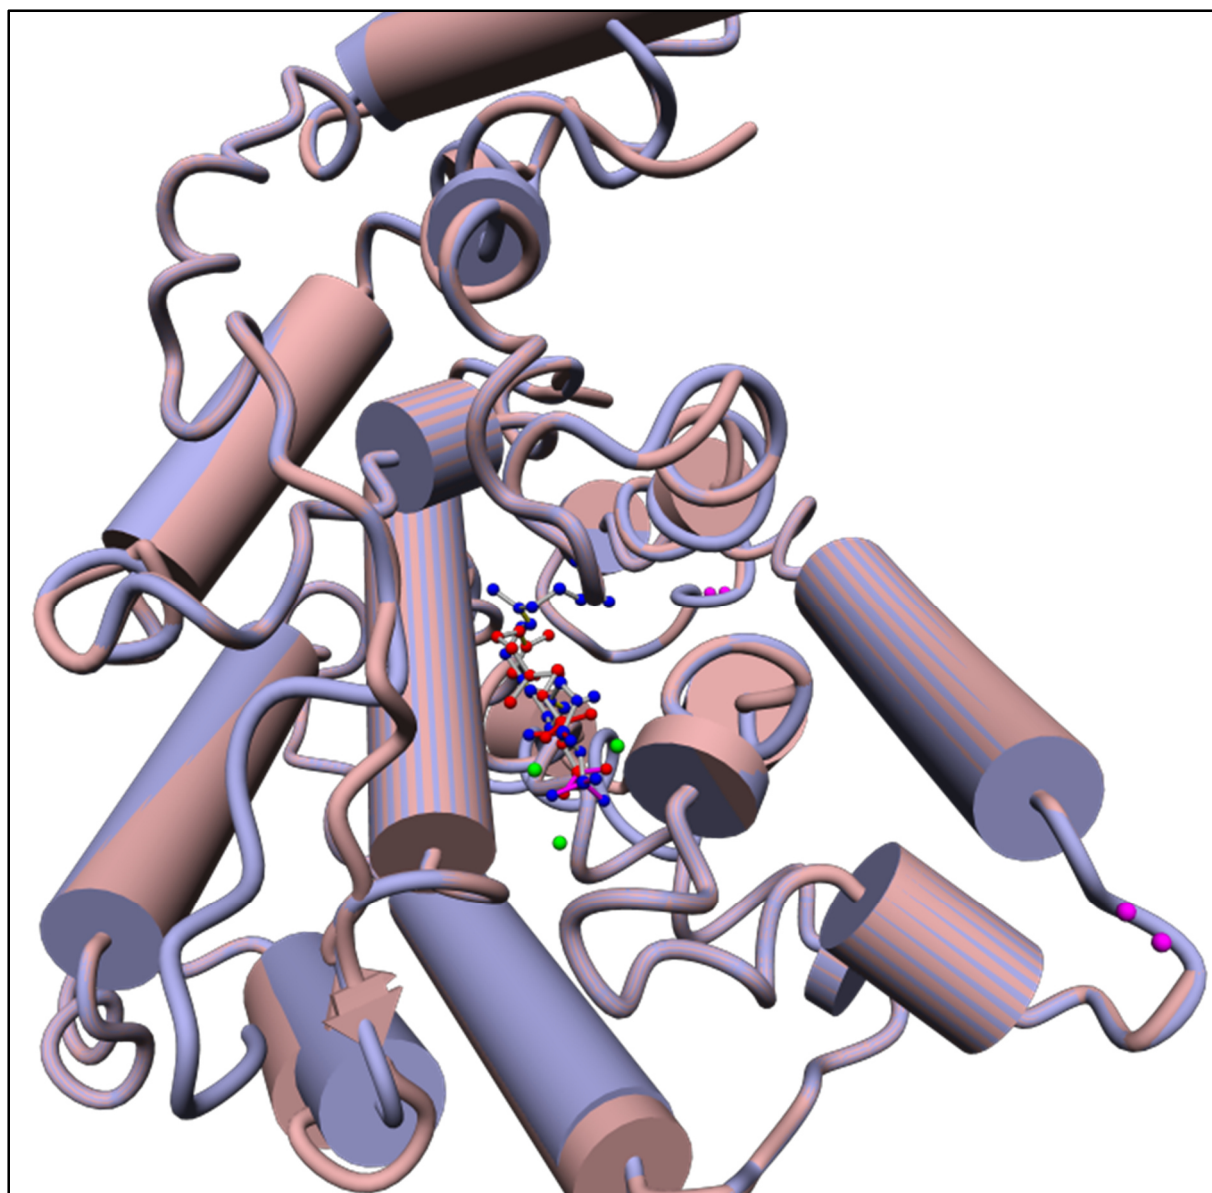

**Fig. S1b: Structural superposition of BPPS and TXS**

Structural superposition of the closed conformation of BPPS (PDB: 1N20)<sup>2</sup> (light red) with TXS (light blue). The alignment exhibits a root mean square deviation (RMSD) of 0.304Å over 331 AAs with 31.42 % sequence identity. In BPPS and TXS only the amino acids (AA) characterizing the class I domains (BPPS: AA54-99 + AA 272-598; TXS: AA80-130 + AA537-862) are shown. The substrate of BPPS 3-aza-2,3-dihydrogeranyl diphosphate is shown in red, the substrate of TXS geranylgeranyl pyrophosphate (**GGPP**) is shown in blue. Magnesium ions are shown in green.

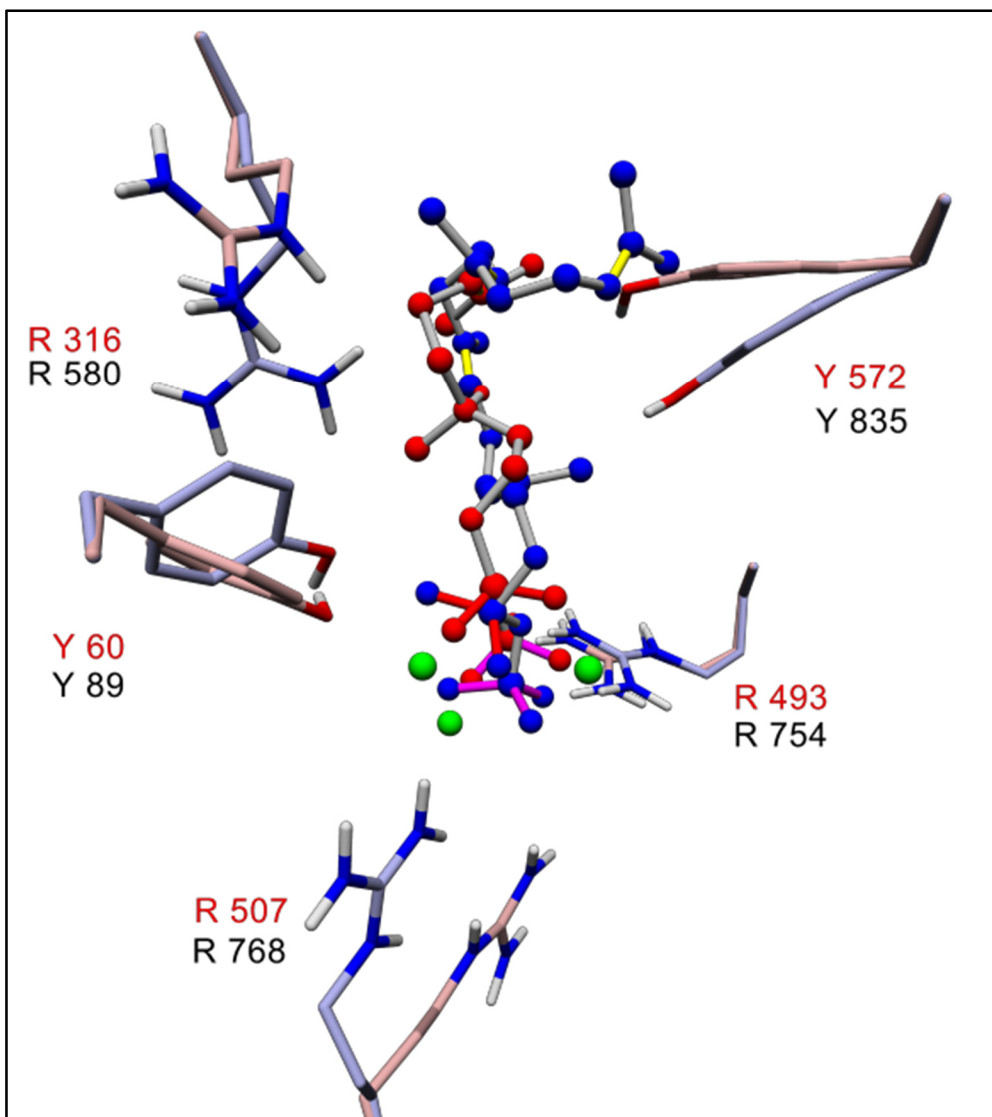

**Fig. S1c: Structural superposition of the H-bond donor amino acid network of BPPS and TXS**

Structural superposition of the closed conformation of BPPS (PDB: 1N20) (light red) with TXS (light blue). The amino acids representing the H-bond donor network of BPPS and TXS are shown (BPPS residues in red, the corresponding TXS residues in black). Substrate colours are corresponding to **Fig. S1a**.

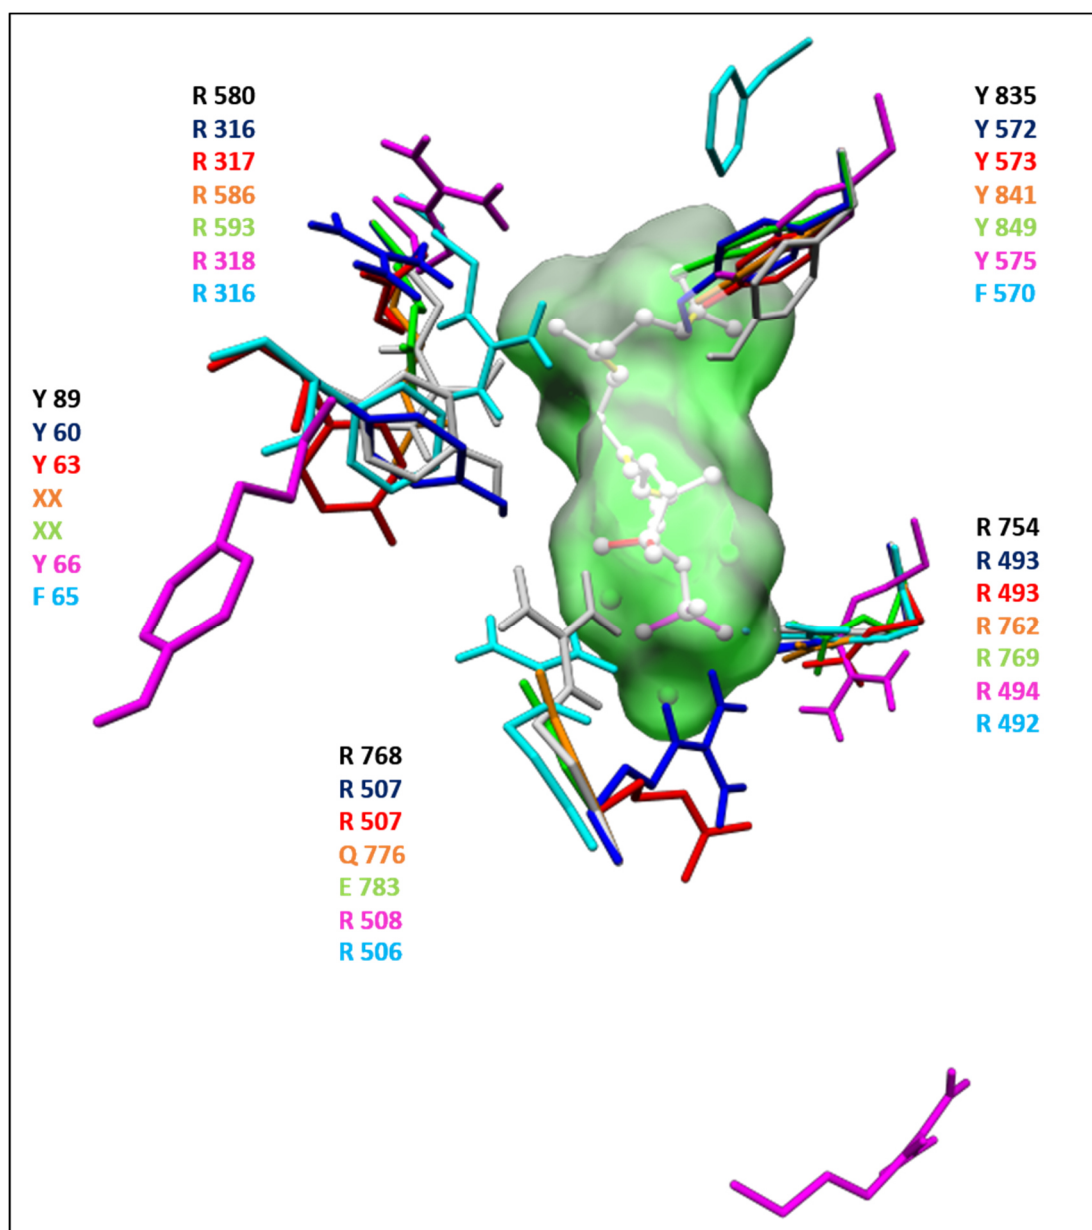

**Fig. S1d: Structural superposition of eukaryotic mono- and diterpene synthases**

A structural superposition of the H-bond donor amino acid network of eukaryotic mono- and diterpene synthases is shown. TXS in closed conformation (diterpene synthase: residues in gray, labelling in black, **GGPP** in gray with molecular surface), BPPS in closed conformation (monoterpene synthase: blue (PDB: 1N20)), limonene synthase from *M. spicata* in closed conformation (mono terpene synthase: red (PDB: 2ONG)), class I domain of abietadiene synthase from *A. grandis* (bifunctional diterpene synthase: orange (PDB: 3S9V)), class I domain of isopimaradiene synthase from *P. abies* (bifunctional diterpene synthase: green (homology model, this work)), casbene synthase from *J. curcas* (diterpene synthase: magenta (open conformation homology model, this work)) and cembratriene-ol synthase (CBTS) from *N. tabacum* (diterpene synthase: light blue (closed conformation homology model, this work)). Note that in the bifunctional diterpene synthases the corresponding second tyrosine (XX) is part of the class II domain and thus could not be taken into account.



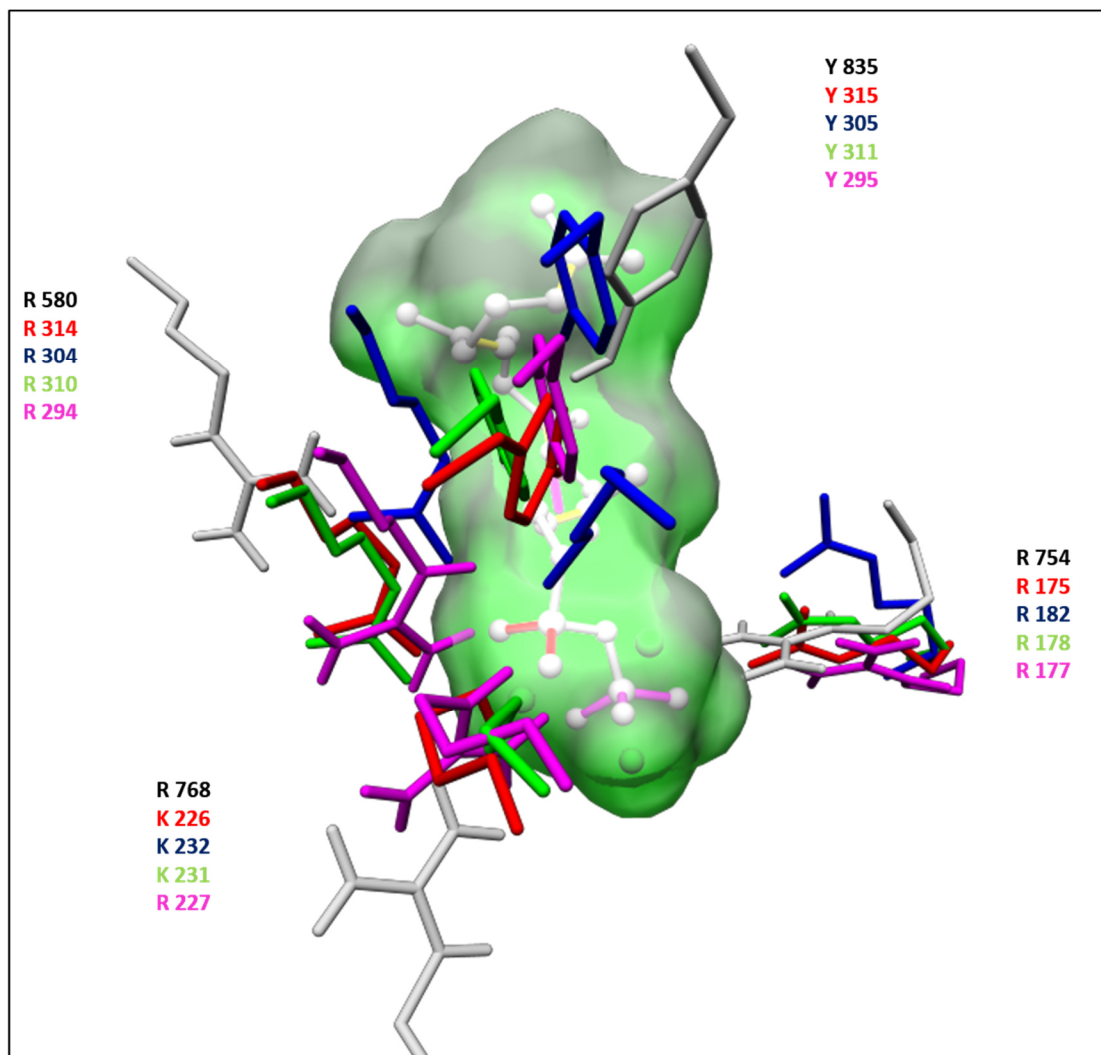

**Fig. S1e: Structural superposition of bacterial and fungal sesqui- and diterpene synthases with TXS**

A structural superposition of the H-bond donor amino acid network of bacterial and fungal sesqui- and diterpene synthases is shown. TXS in closed conformation (diterpene synthase: residues in gray, labelling in black, **GGPP** in gray with molecular surface), aristolochene synthase from *A. terreus* in closed conformation (fungal sesquiterpene synthase: red (PDB: 2OA6)), trichodiene synthase from *F. sporotrichioides* in closed conformation (fungal sesquiterpene synthase: blue (PDB: 1JFG)), selinadiene synthase from *S. pristinaespiralis* in closed conformation (bacterial sesquiterpene synthase: green (PDB: 4OKZ)) and cyclooctat-5-en-7-ol (CotB2) from *S. melanosporofaciens* (bacterial diterpene synthase: magenta, closed conformation model, this work: open conformation crystal structure PDB: 4OMG)). Note that bacterial and fungal sesqui- and diterpene synthase comprise a different overall fold with respect to TXS. Nevertheless the class I domain active site cavities correspond to that of their eukaryotic counterparts. The second corresponding tyrosine residue (Y89 in TXS) does not exist in bacterial and fungal sesqui- and diterpene synthases.

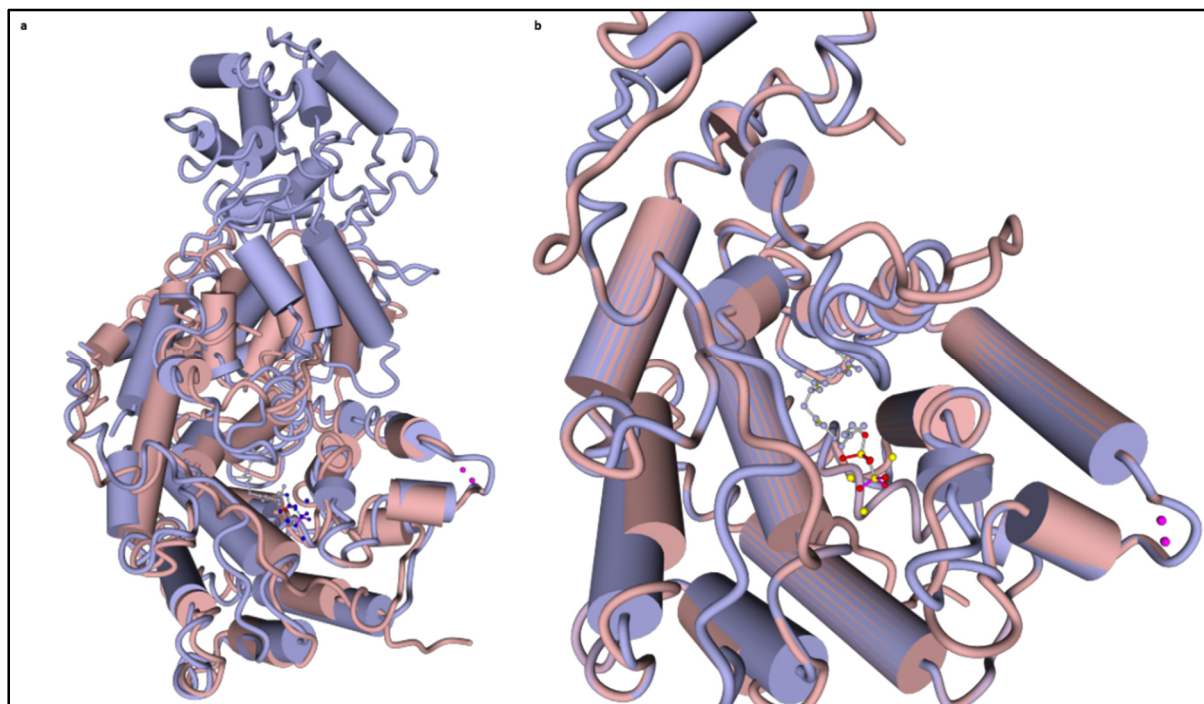

**Fig. S1f: Structural superposition of TXS with the open conformation of CBTS from *N. tabacum***

**(a)** Structural superposition of TXS harboring **GGPP** (AA 80-862) with the open conformation homology model of CBTS (amino acids 50-598) from *N. tabacum*. **(b)** Structural superposition of the class I domain of TXS (AA80-130 + AA537-862) with the class I domain of CBTS (AA 50-105 + AA272-598).

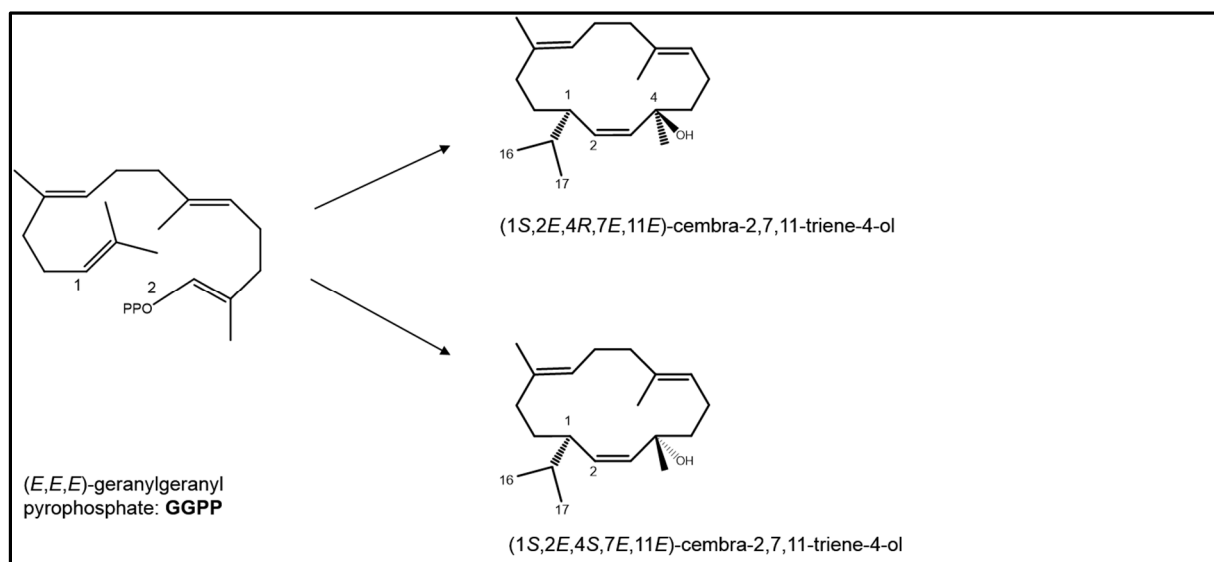

**Fig. S1g: Reaction catalysed by CBTS**



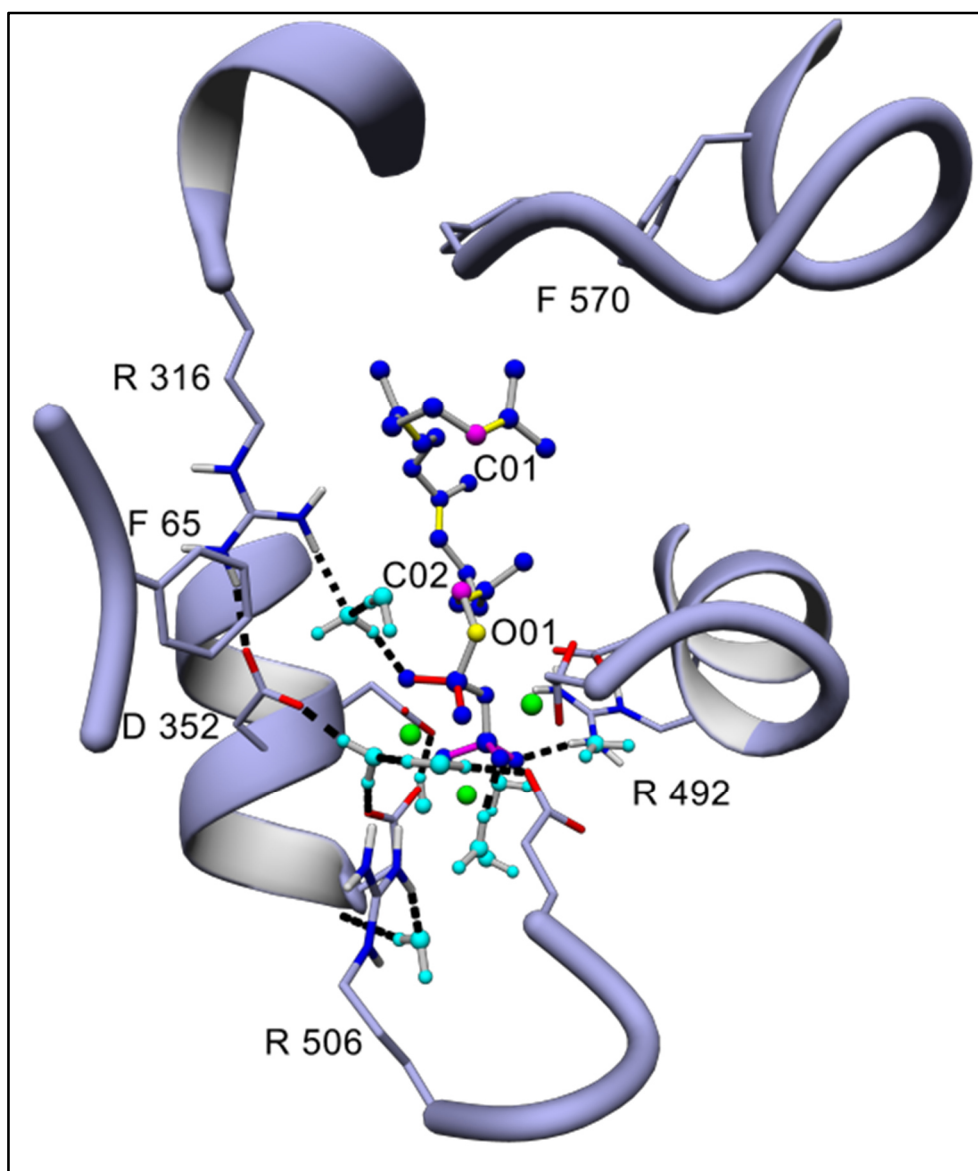

**Fig. S1h: Closed conformation homology model of CBTS harboring GGPP**

Closed conformation homology model of CBTS harboring **GGPP** and the H-bond donor amino acid network (R492, R506 and R570). The tyrosine residues facilitating binding of remaining bulk solvent water in TXS (Y89 and Y835) are natively replaced by F65 and F570, respectively. **GGPP** is coloured in blue, magnesium ions in green, remaining water in cyan. O01 of PP<sub>i</sub> is coloured in yellow, C01 and C02 supposed to bind in order to form a monocyclic carbocation are shown in magenta.

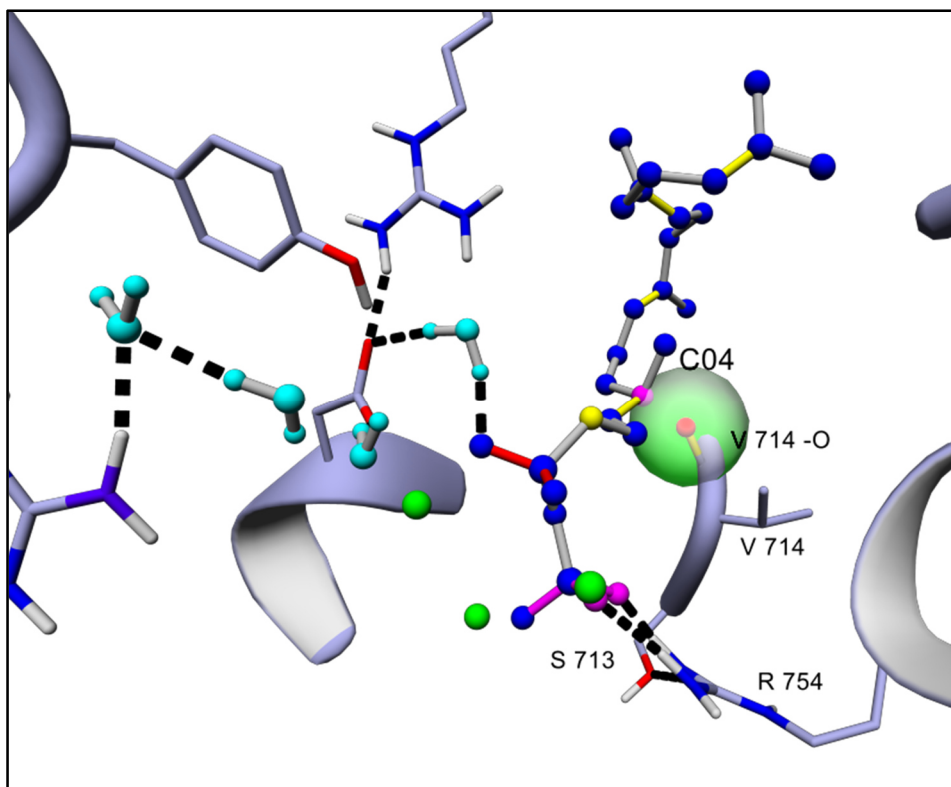

**Fig. S2: Induced fit mechanism in TXS**

Induced fit model of TXS. The model represents the time point immediately after active site closure. Upon substrate binding the PP<sub>i</sub> sensor R754 has formed hydrogen bonds (black) to the O-atoms of **GGPP** (magenta) and to the linker S713. Interaction of the linker with the sensor leads to the effector V714 turning inwards. The V714 carbonyl atom points then directly towards the  $\Delta_{3,4}$  of the substrate (magenta), which is thought to provoke abstraction of PP<sub>i</sub> to form the geranylgeranyl cation and initiate the cyclization cascade. O01 of **GGPP** is shown in yellow, magnesium ion are shown in green.

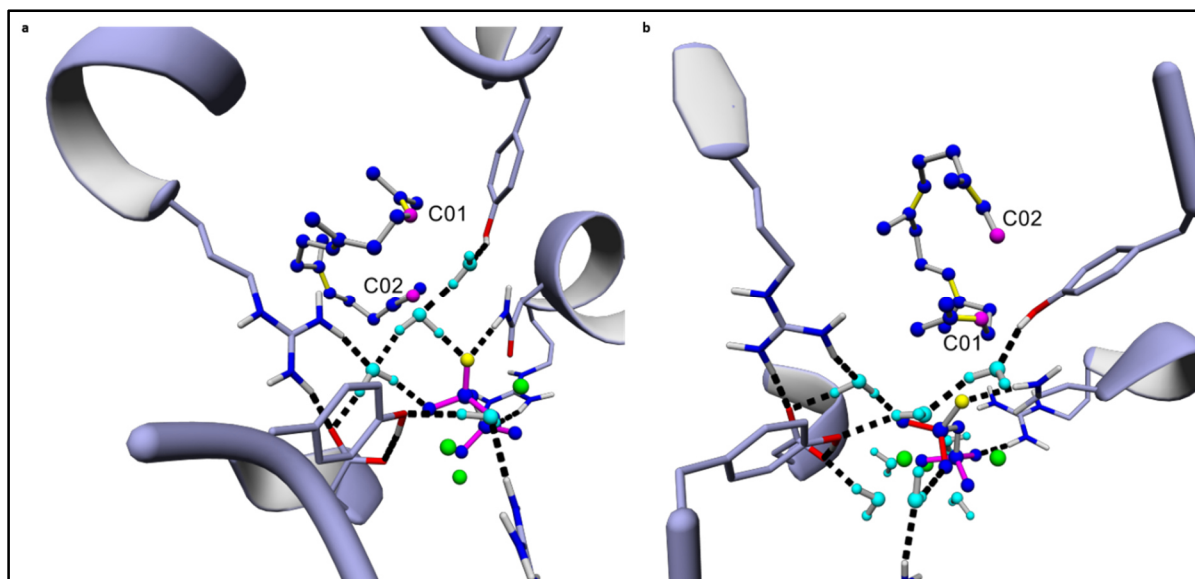

**Fig. S3a: Molecular docking of QM-derived cation A into TXS**

Molecular docking of QM-derived cation A into the active site of TXS by AutodockVina of YASARA structure. Cluster analysis of 999 docking runs shows two different conformation cluster of **cation A** in the active site. **(a)** Conformation A exhibits a binding energy of  $7.206 \text{ kcal mol}^{-1}$ , **(b)** conformation B exhibits a binding energy of  $7.678 \text{ kcal mol}^{-1}$ . Despite a higher binding energy of conformation B, the spatial positioning of conformation B in the active site does not correspond to the spatial positioning of productive **GGPP** in the modelled closed complex (**Fig. 2b**) and is therefore not in productive sequence **GGPP**->**cation A** during initiation of catalysis. Conformation A of **cation A** directly arises from productive **GGPP** after abstraction of  $\text{PP}_i$ .

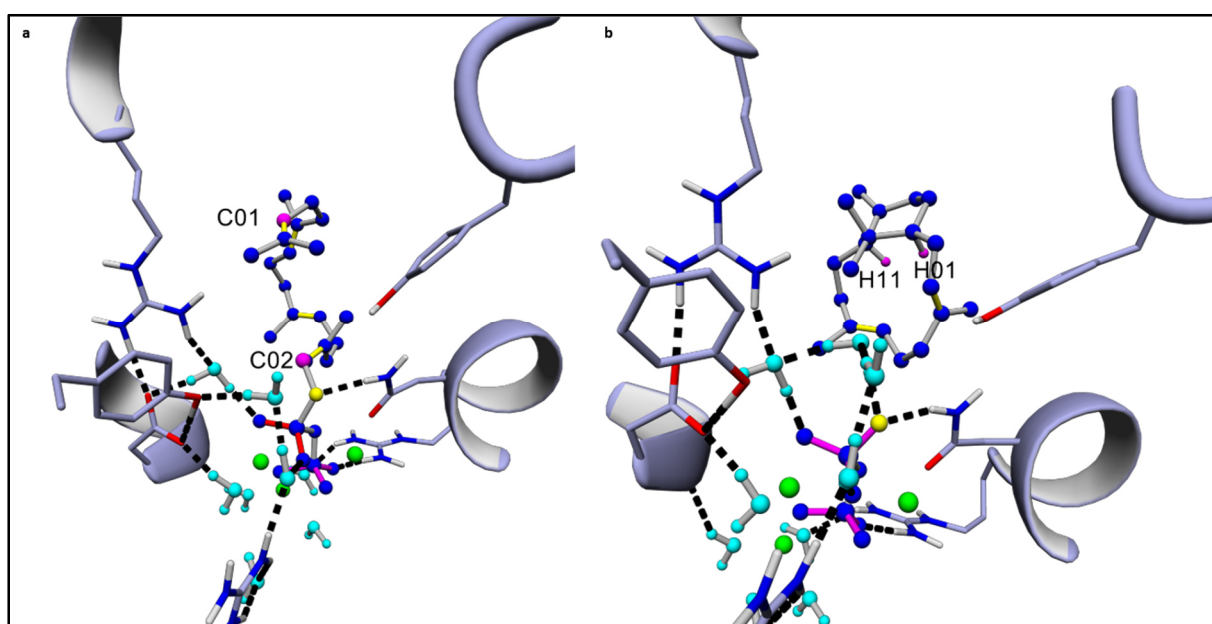

**Fig. S3b: TXS harboring the GGPP conformation derived from the crystal structure**

**(a)** TXS containing a **GGPP** in the unproductive conformation derived from the **2F-GGPP** conformation of the open complex crystal structure (PDB: 3P5R). **(b)** Manual bond formation and energy minimization to **cation C**<sup>+</sup>. This verticillen-12-yl cation<sup>+</sup> is characterized by an inverted trans-bridgehead stereochemistry of H11 and H1 compared to the verticillen-12-yl cation derived from a productive **GGPP** conformation (**Fig. 4a**), which disturbs the sequence of the hydride shifts. It exhibits moreover an overall inverted positioning in the active and is therefore not productive for the cyclization to **cation F** or **-D**.

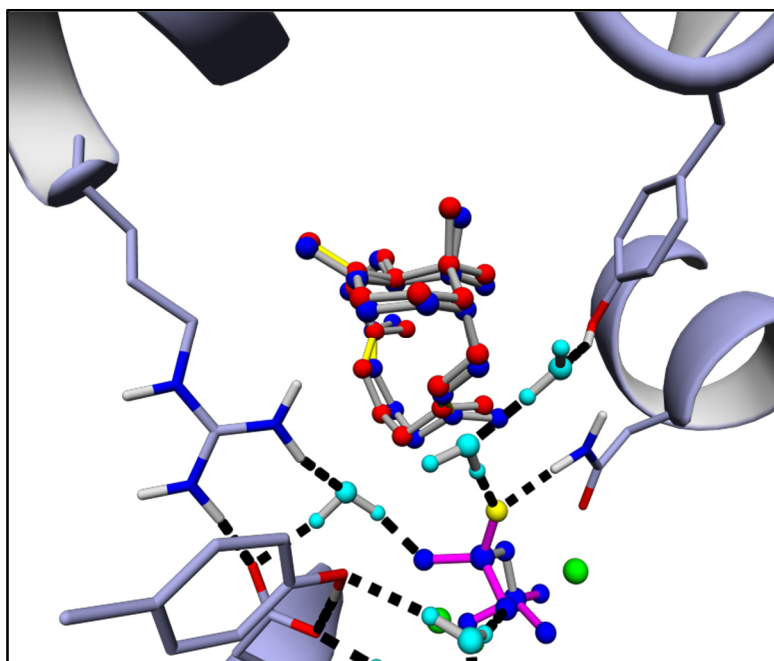

**Fig. S3c: Manually built cation C and molecular docking of QM-derived cation C in TXS**

Molecular docking of QM-derived **cation C** (red) into TXS and structural superposition with manually built **cation C** (blue).

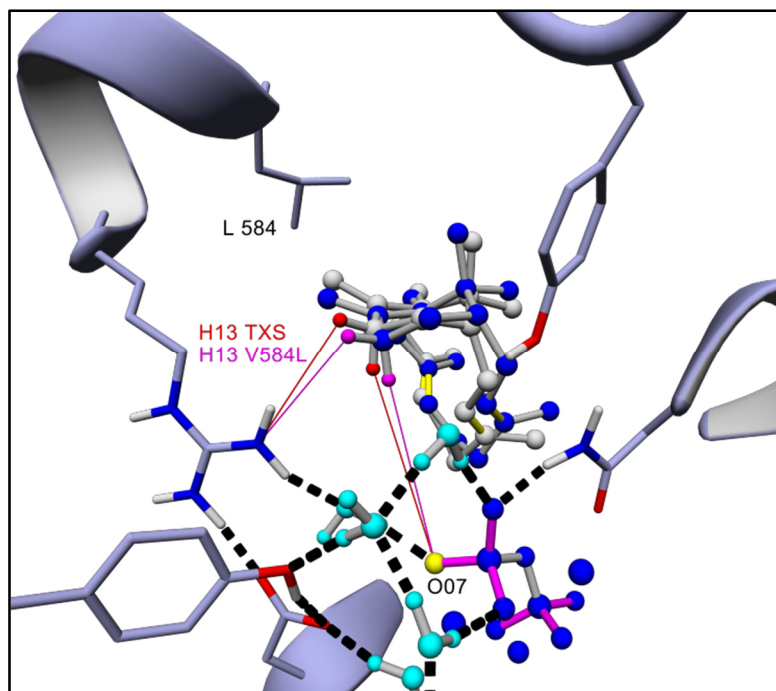

**Fig. S3d: Structural superposition of TXS cation C with TXS-V584L cation C**

Superposition of TXS-V584L harboring manually built **cation C** (blue) with manually built **cation C** of TXS (gray). C13 hydrogens abstracted during R580-PP<sub>i</sub>-assisted deprotonation resulting in formation of verticillia-3,4-7,8-12,13-triene are shown (C13 hydrogens of TXS in red, C13 hydrogens of TXS-V584L in magenta). Distance between H13equatorial (H13e) of TXS-V584L and NH<sub>2</sub> of R580 is 3.09 Å (magenta line), distance between H13e of TXS and NH<sub>2</sub> of R580 is 3.87 Å (red line). Distance between H13axial (H13a) of TXS-V584L and O07 of PP<sub>i</sub> is 4.22 Å, distance between H13a of TXS and O07 of PP<sub>i</sub> is 4.83 Å.

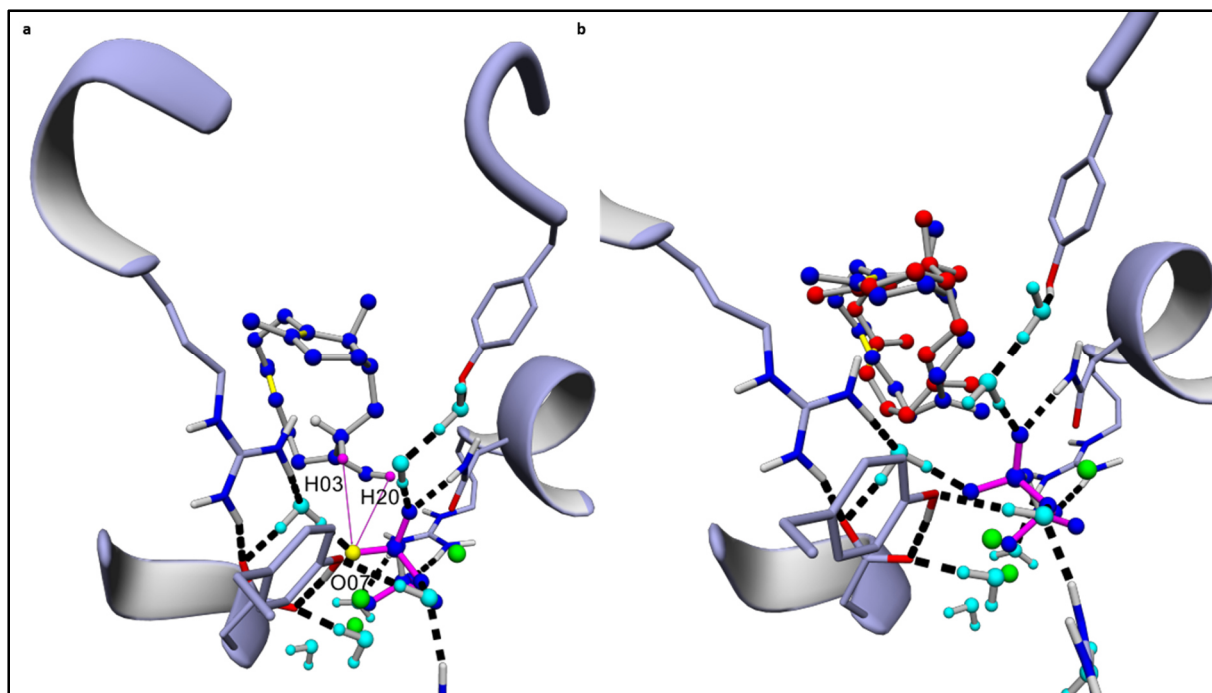

**Fig. S3e: Manually built cation F and molecular docking of QM-derived cation F in TXS**

**(a)** TXS containing manually built **cation F**. Distance (magenta line) between H03 and O07 of  $PP_i$  is 3.19 Å, distance (magenta line) between H20 (closest) and O07 of  $PP_i$  is 3.69 Å. Abstraction of C03 in this **cation F** by the R580- $PP_i$  motif results in formation of **V2**, abstraction of one of the C20 hydrogens results in formation of **V1**. The distance between R580- $PP_i$  and the positively charged C-atom (C03) is 4.06 Å. **(b)** Molecular docking of QM-derived **cation F** (red) into TXS and structural superposition with manually built **cation F** (blue).

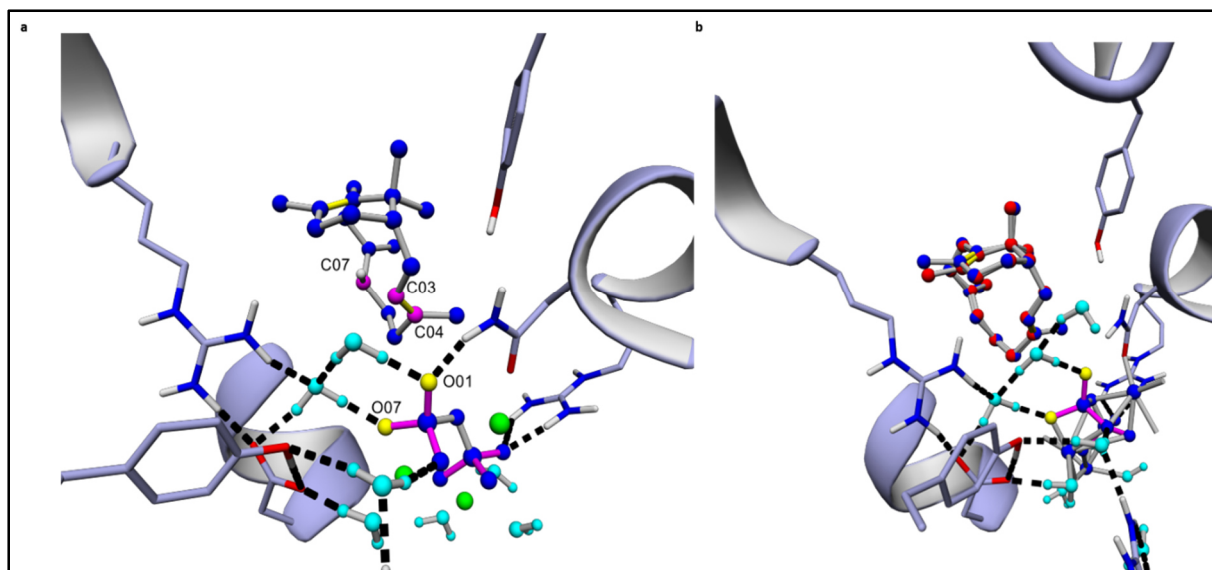

**Fig. S3f: Manually built cation D1 and molecular docking of QM-derived cation D1 in TXS**

(a) TXS containing manually built **cation D1**. Distance between  $\Delta_{3,4}$  and O01 of PPi is 3.62 Å. (b) Molecular docking of QM-derived **cation D1** (red) into TXS and structural superposition with manually built **cation D1** (blue).

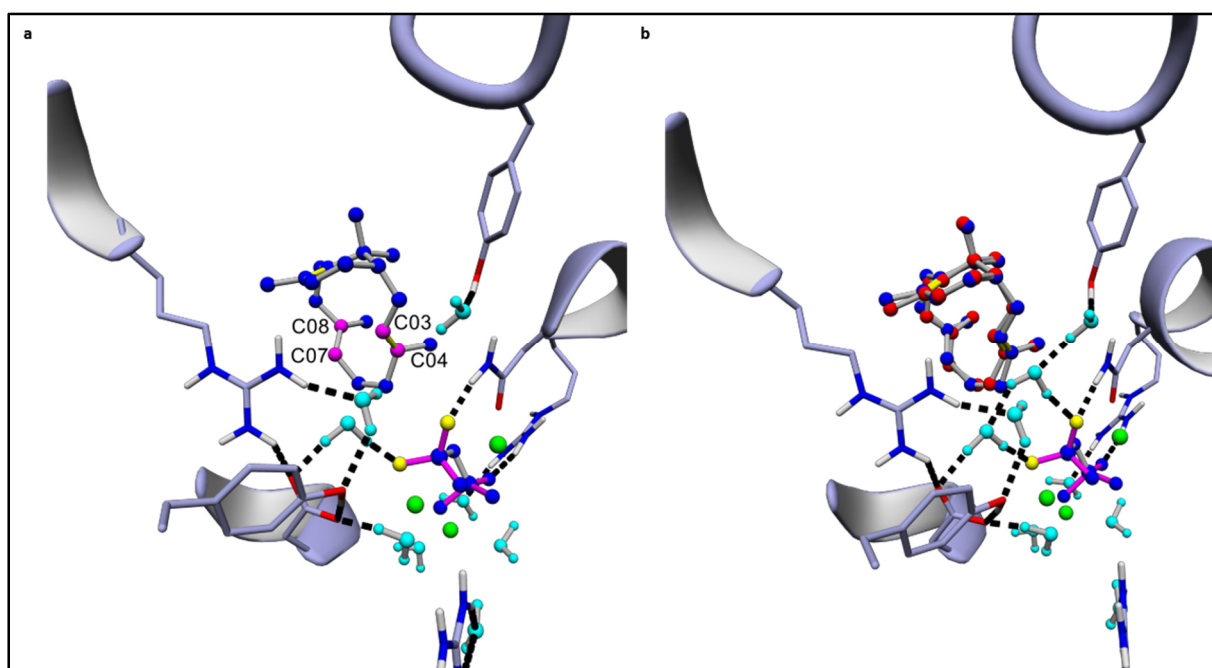

**Fig. S3g: Manually built cation D2 and molecular docking of QM-derived cation D2 in TXS**

(a) TXS containing manually built **cation D2**. (b) Molecular docking of QM-derived **cation D2** (red) into TXS and structural superposition with manually built **cation D2** (blue).



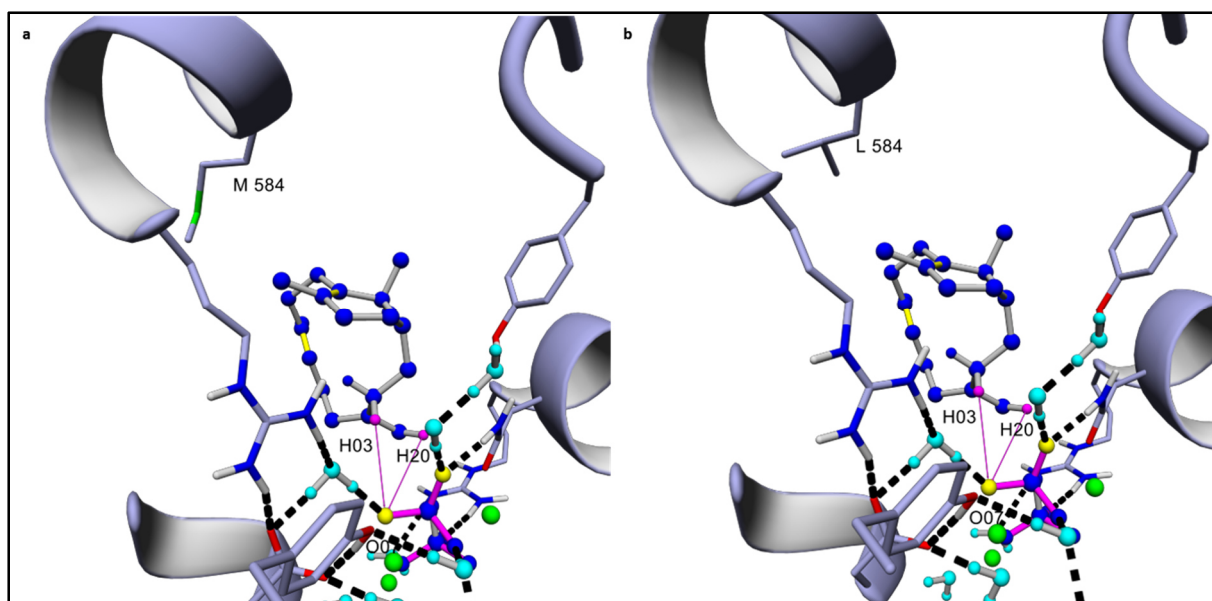

**Fig. S3h: TXS-V584M/L harboring cation F**

(a) TXS-V584M harboring manually built **cation F**. (b) TXS-V584L harboring manually built **cation F**. Magenta lines indicate the distance of H03 and H20 (closest) to the R580-PP<sub>i</sub> bi-functional motif.

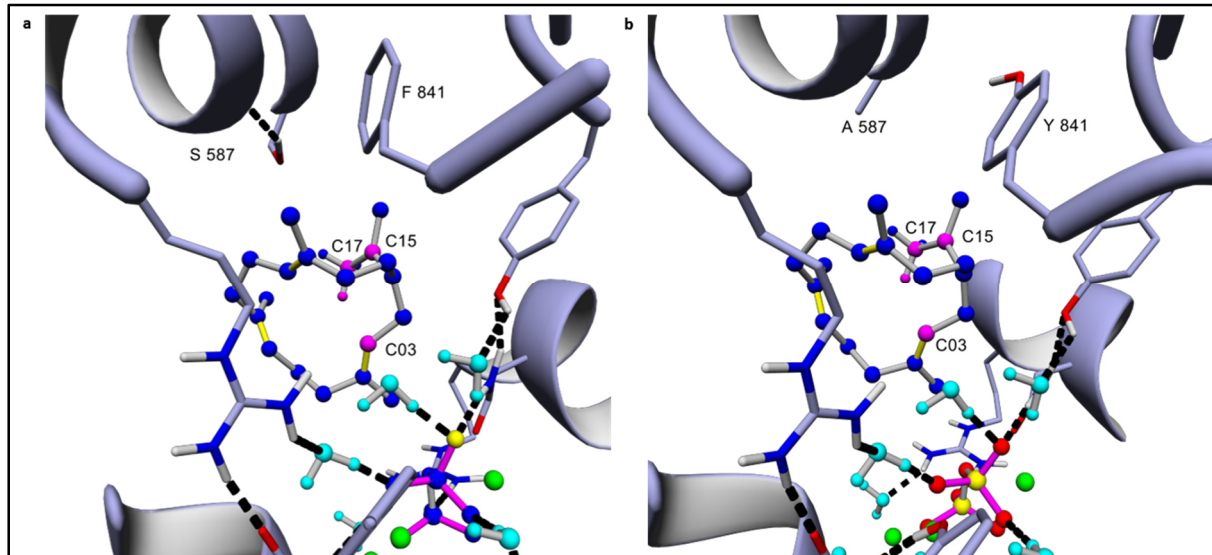

**Fig. S3i: TXS-Y841F and TXS-S587A harboring cation B**

(a) TXS-Y841F harboring manually built **cation B**. Distance between “liberated” and thus cyclization interfering S587-OH and cationic C15 is 4.162 Å. (b) TXS-S587A harboring manually built **cation B**. Distance between “liberated” and thus cyclization interfering Y841-OH and cationic C15 is 4.862 Å. Formation of **CM** in Y841F and S587A mutants can be explained by electrostatic stabilization of the proximal positive charge at C15 by S587 or Y841. An interfered transition of **cation B** to **-C** would enable, governed by R580-PP<sub>i</sub>, a not native hydride-shift of



a single C17 hydrogen to  $\Delta_{3,4}$  in **cation B**. This, in turn, brings the positive charge into close proximity to R580-PP<sub>i</sub> with consequent deprotonation of C3.

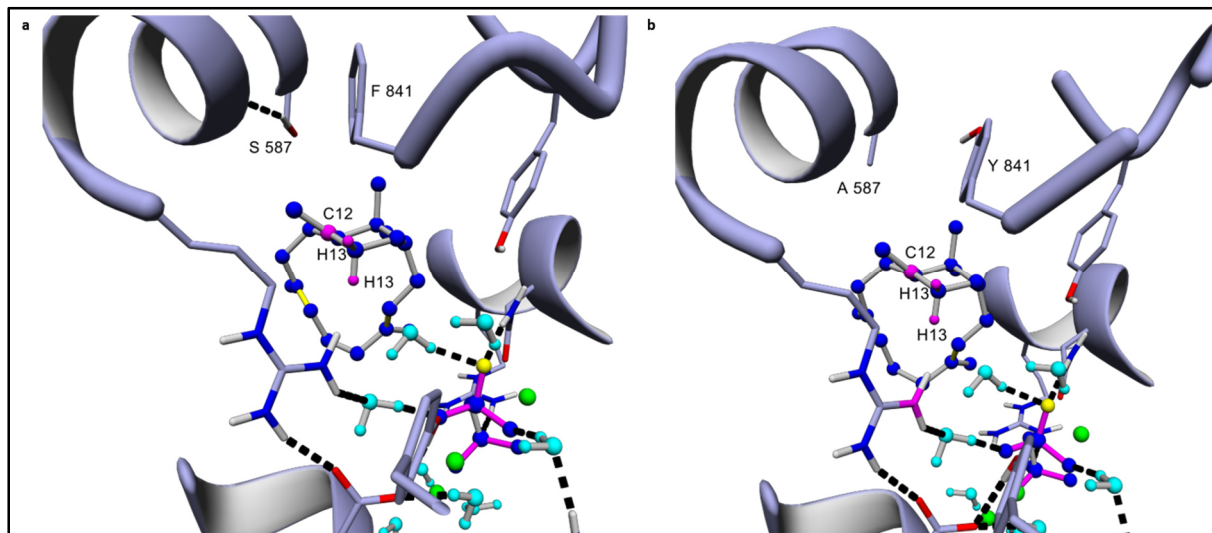

**Fig. S3j: TXS-Y841F and TXS-S587A harboring cation C**

**(a)** TXS-Y841F harboring manually built **cation C**. Distance between “liberated” and thus cyclization interfering S587-OH and cationic C12 is 3.859 Å. **(b)** TXS-S587A harboring manually built **cation C**. Distance between “liberated” and thus cyclization interfering Y841-OH and cationic C12 is 5.805 Å. Deprotonation of C13 resulting in formation of **V** seems to be facilitated by electrostatic stabilization of cationic C12 by “liberated” S587 or Y841, respectively. This stabilization leads consequently to an interfered and slowed transition to **cation F**, accompanied by simultaneous cation steering by R580-PP<sub>i</sub> towards itself. The bi-functional motif seems then accordingly to be the active site base

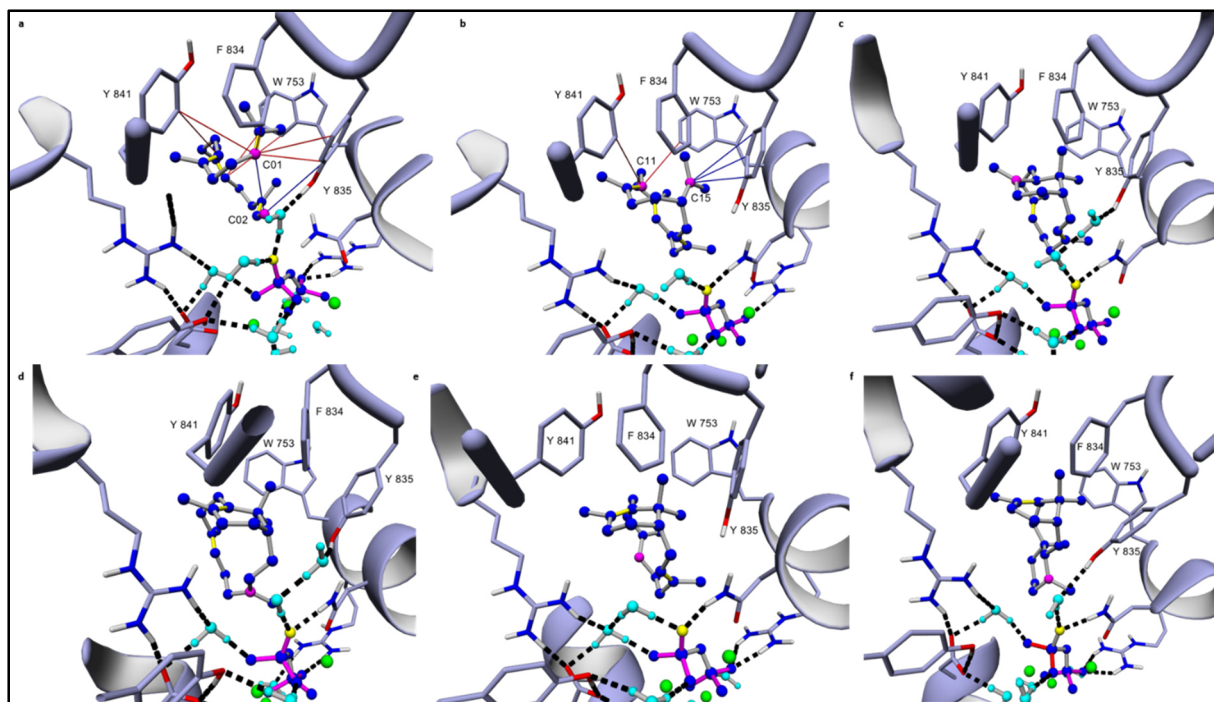

**Fig. S4: Amino acid-assisted stabilization of cations**

(a-f) Amino acid-assisted  $\pi$ - $\pi$  (red) and cation- $\pi$  interactions (blue) acting in stabilization of cations in the active site. (a) TXS harboring manually built **cation A**, (b) TXS harboring manually built **cation B**, (c) TXS harboring manually built **cation C**, (d) TXS harboring manually built **cation F**, (e) TXS harboring manually built **cation D1** (-**D2** is also characterized by no amino acid-assisted  $\pi$ - $\pi$  and cation- $\pi$  interactions) and (f) TXS harboring manually built **cation E**.

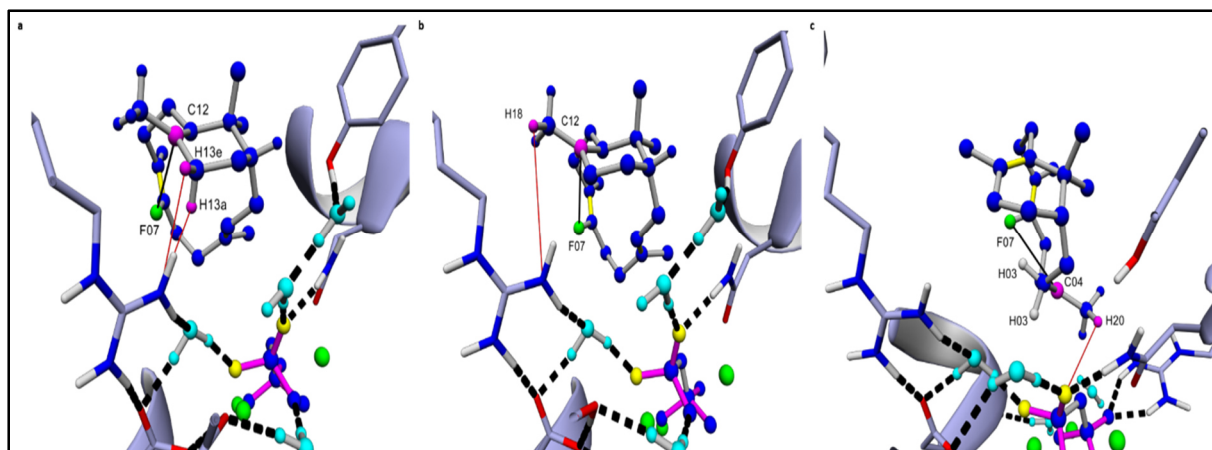

**Fig. S5a: TXS-cation C and -F complexes harboring 7-fluoro-GGPP-derived cations C and F**

**(a-b)** TXS harboring the manually built **7-fluoro-GGPP-derived cation C**. **(a)** The **7-fluoro**-ligand is shown in green, positive charged C12 and closed H18 presumably abstracted by R580-PP<sub>i</sub>, resulting in formation of *exo*-7-fluorovercillene are shown in magenta. Distance between C12 and F07 is 3.012 Å, distance between closest H18 and R580-PP<sub>i</sub> is 4.306 Å. **(b)** The **7-fluoro**-ligand is shown in green, positive charged C12 and H13axial (H13a) as well as H13equatorial (H13e) presumably abstracted by R580-PP<sub>i</sub>, resulting in formation of *endo*-7-fluorovercillene are shown in magenta. Distance between C12 and F07 is 3.012 Å, distance between H13a and R580-PP<sub>i</sub> is 3.158 Å, distance between H13e and R580-PP<sub>i</sub> is 3.290 Å. **(c)** TXS harboring manually built **cation F** and **7-fluoro-GGPP** as substrate. The **7-fluoro**-ligand is shown in green, positive charged C04 and closest H20 presumably abstracted by R580-PP<sub>i</sub>, resulting in formation of 7-fluorovercillia-4(20),7,11-triene are shown in magenta. H03 atoms are shown in gray. Distance between C04 and F07 is 3.334 Å, distance between closest H20 and R580-PP<sub>i</sub> is 3.411 Å.

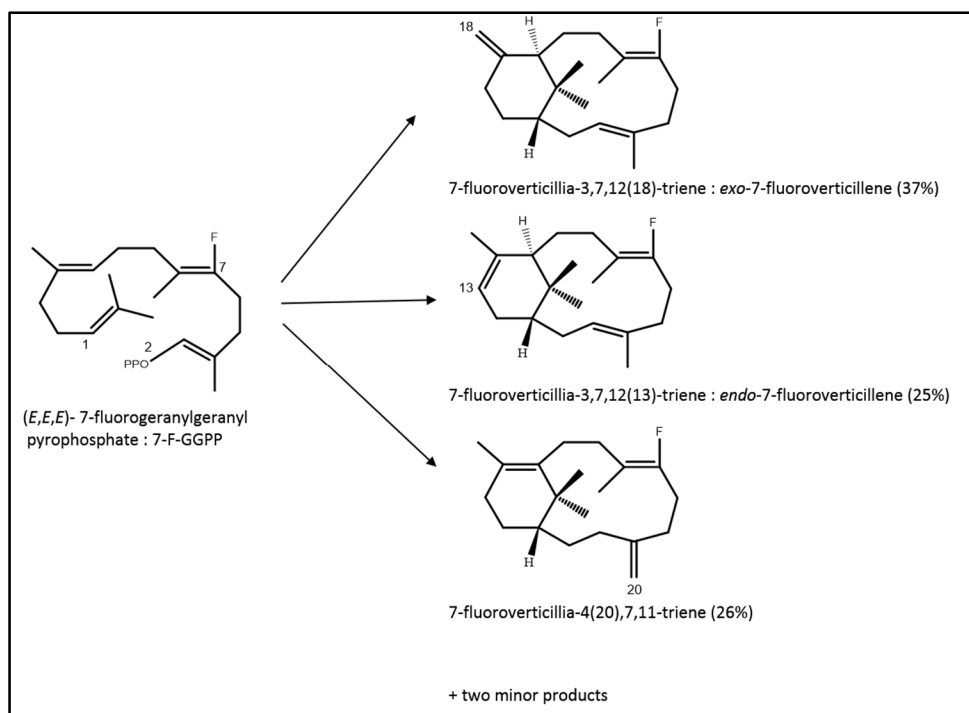

**Fig. S5b: Product distribution of TXS incubated with 7-fluoro-GGPP**

The TXS-**cation C** and -**F** complexes harboring the manually built 7-fluoro-GGPP-derived **cations C** and -**F** (Fig. S5a-c) are able to give an indication for the product distributions observed during incubation with 7-fluoro-GGPP.<sup>3</sup> These experiments conducted by Jin and coworkers, show a 37% outcome of *exo*-7-fluorovercicillene. Our models (Fig. S5a-b) show closer distances between H13a/e, abstracted in formation of *endo*-7-fluorovercicillene, and R580-PP<sub>i</sub>, compared to the distance between closest H18 (to R580-PP<sub>i</sub>), abstracted in formation of *exo*-7-fluorovercicillene and R580-PP<sub>i</sub>. This would suggest a favored *endo*-7-fluorovercicillene formation. However, the models further indicate that the 7-fluoro ligand is able to counteract H13a/e abstraction by a transient electrostatic attraction of H13a/e. This attraction is reduced in respect to closest H18, resulting in the observed product distribution derived from deprotonation of **cation C**. The distance between F07 and H13a is 3.247 Å and the distance between F07 and H13e is 4.358 Å. In contrast, distance between closest H18 and F07 is 4.859 Å. The electrostatic attraction of F07 with H03 protons in **cation F** (Fig. S5c) is moreover able to explain the absence of a 7-fluorovercicillia-3,7,11(12)-triene as another major product in their observed product distribution, despite close proximity of H03 protons to R580-PP<sub>i</sub>, corresponding to the observed formation of **V2** in Fig. S3e.

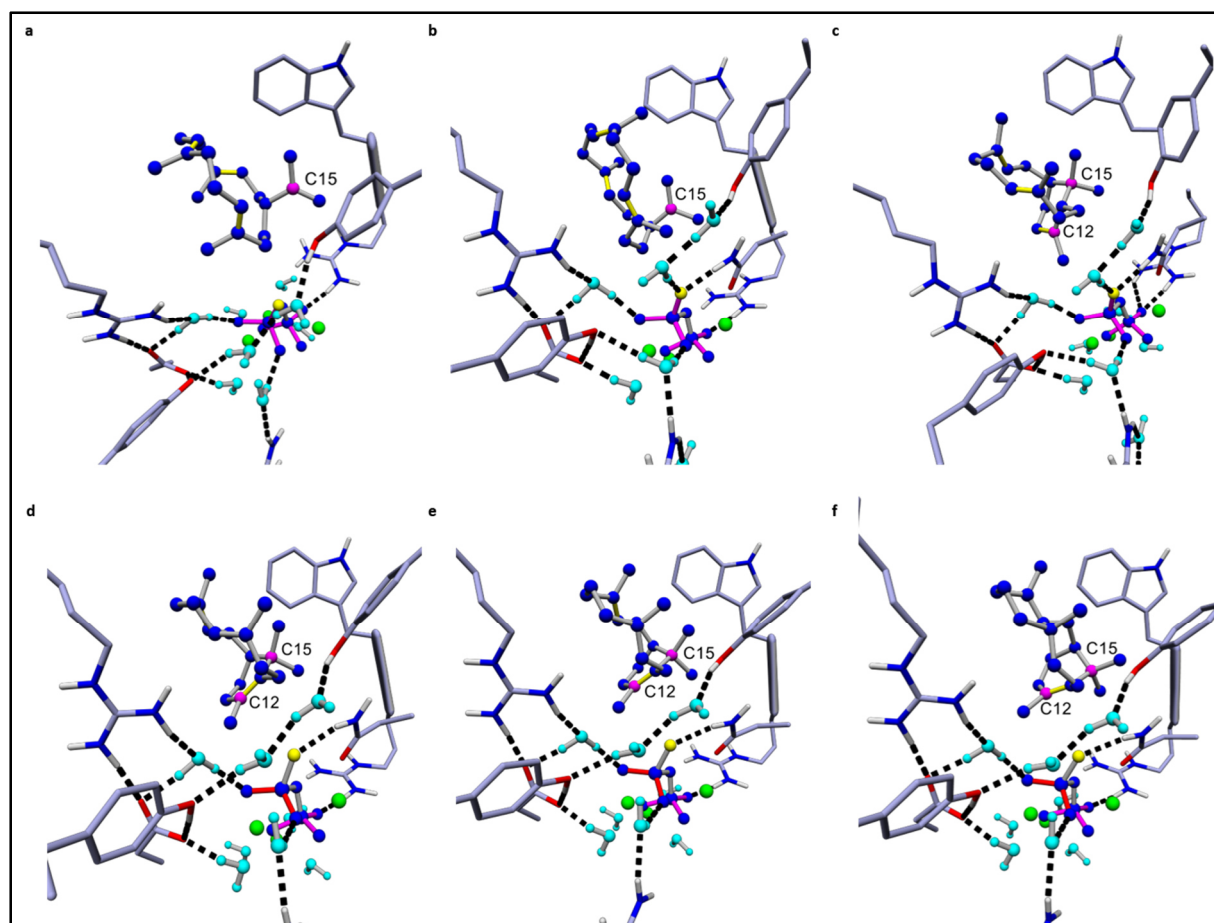

**Fig. S6: Representation of unproductive docking cluster**

Representation of unproductive docking cluster in accordance to **Table S3**. **(a)** Representation of the conformational cluster of **cation B**, that is structurally not derived from productive **cation A** due to its localization in the active site (**Fig. 2c, d** and **Fig. S3a**), obtained upon docking of QM-derived **cation B** into its corresponding transient enzyme complex. **(b)** Representation of the conformational cluster of **TS B-C**, that is, due to its localization it the active site, structurally not derived from productive **cation A**, obtained upon docking of QM-derived **TS B-C** into its corresponding transient enzyme complex. **(c)** Representation of the conformational cluster of **cation C**, that is, due to its localization it the active site, structurally not derived from productive **TS B-C**, obtained upon docking of QM-derived **cation C** into its corresponding transient enzyme complex. **(d)** Representation of the conformational cluster of **cation D1**, that is, due to its localization it the active site, structurally not derived from productive **cation C**, obtained upon docking of QM-derived **cation D1** into its corresponding transient enzyme complex. **(e)** Representation of the conformational cluster of **cation D2**, that is, due to its localization it the active site, structurally not derived from productive **cation D1**, obtained upon docking of QM-derived **cation D2** into its corresponding transient enzyme complex. **(f)** Representation of the conformational cluster of **cation E**, that is, due to its localization it the active site, structurally not derived from productive **cation D2**, obtained upon docking of QM-derived **cation E** into its corresponding transient enzyme complex.

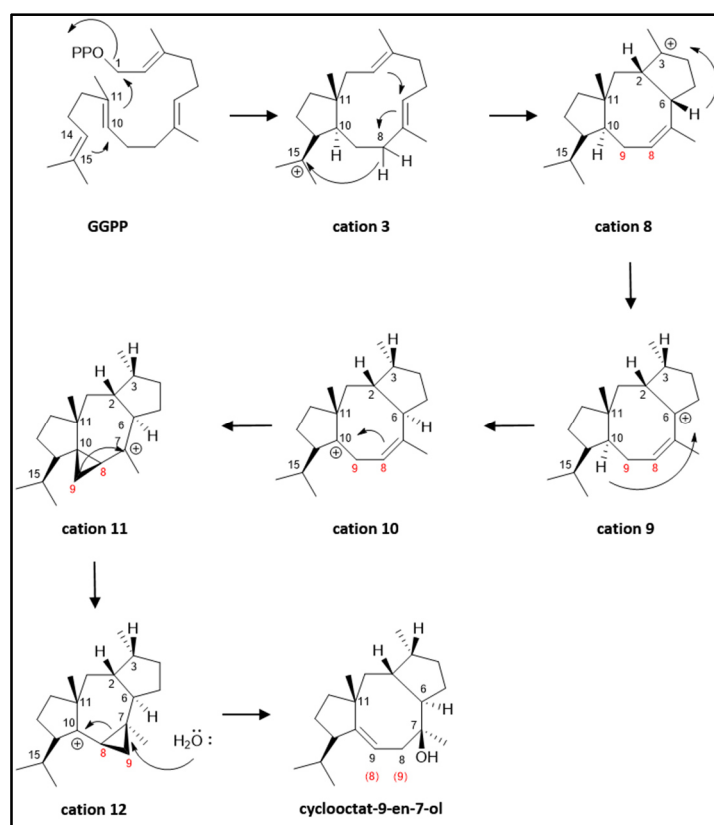

**Fig. S7a: Proposed mechanism for the formation of cyclooctat-9-en-7-ol**

Proposed mechanism for the formation of cyclooctat-9-en-7-ol from **GGPP** by CotB2 derived by NMR-spectroscopic studies conducted by Meguro et al.<sup>4</sup>

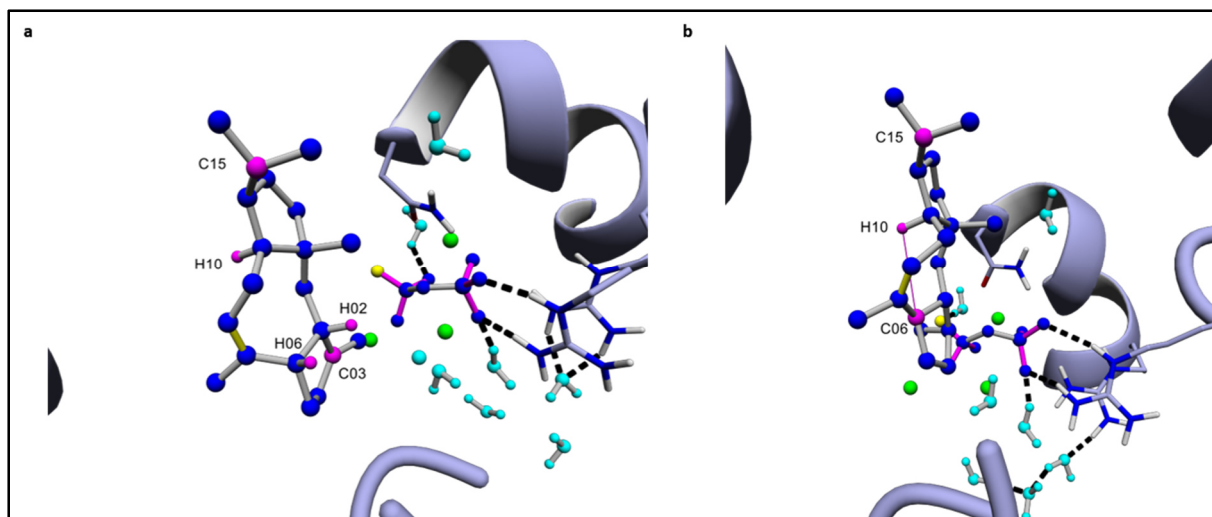

**Fig. S7b: CotB2 harboring the proposed cation 8 and -9**

(a) CotB2 harboring the manually built proposed **cation 8** (Fig. S7a), derived from the CotB2•**cation B** complex (Fig. S22a). Note that the here established **cation B** corresponds to the proposed **cation 3**.<sup>5</sup> (b) CotB2 harboring the manually built proposed **cation 9** (Fig. S7a), derived from the CotB2•**cation 8** complex (Fig. S7b).<sup>5</sup> Manual bonding followed by energy minimization that simulate the proposed subsequent concerted steps in transition of **cation B**->**8**, the 1,5-hydride shift (H8->C15), the double bond rearrangement of  $\Delta 6,7 \rightarrow \Delta 7,8$  as well as the attack of  $\Delta 2,3$  on C06 in the proposed **cation 3** lead to the proposed **cation 8** in the active site of CotB2 (Fig. S7a). However, the proposed subsequent hydride shifts of C06->cationic C03 (**cation8**) and the second 1,5-hydride shift of H10->cationic H06 (**cation 9** in Fig. S7a) seems rather not plausible in these respective complexes as the cationic empty p-orbitals in these cations do not point towards H06 or H10, respectively. This would thus lead to a cis-H02-H06-stereochemistry instead of the experimentally verified trans-stereochemistry (Fig. S7a).

Therefore, we propose the existence of an additional intermediate, **cation C**, with cationic C06 (Fig. S7d, Scheme 2d). We further propose that the 1,5-hydride shift (H8->C15) and the double bond rearrangement ( $\Delta 6,7 \rightarrow \Delta 7,8$ ) take place during the transition of **cation B**->**C** (Fig. S7c, Scheme1c). This, in turn, is followed by the attack of  $\Delta 2,3$  on C06 during the transition of **cation C**->**D**, accompanied by the simultaneous 1,4- (H03->H06) and the second 1,5-hydride shift (H10->H06) (Fig. S7d, Scheme 2d). Consequently, the CotB2 cyclization cascade proceeds *via* **GGPP**->**cation A**->**B**->**C**->**D**->**E**->**F**->**cyclooctat-9-en-7-ol**.



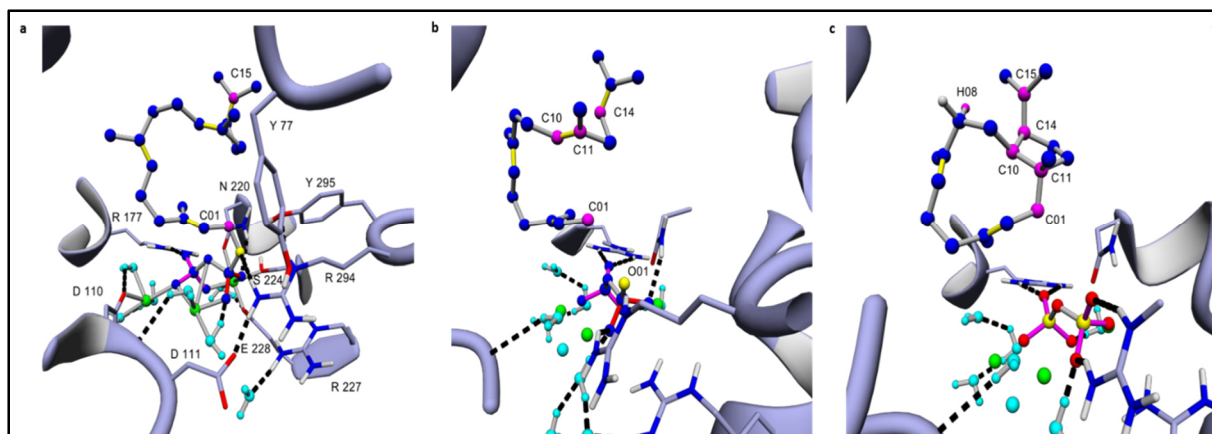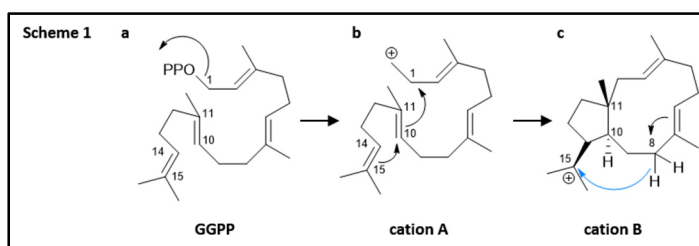

**Fig. S7c: CotB2 harboring GGPP and cations A and B**

**(a)** Closed conformation of CotB2, hereafter designated as CotB2, harboring productive **GGPP** (**scheme 1a**) (C01 and C15 of **GGPP** are shown in magenta, magnesium ions are shown in green, O01 of PP<sub>i</sub> is shown in yellow, remaining bulk water solvent is shown in cyan and coordinating bonds are shown as gray lines). **(b)** CotB2 harboring manually built **cation A** (**scheme 1b**). Carbon atoms involved in cyclization to **cation B** are shown in magenta. Note, that numbering of cations herein differ from the shown experimental observed catalytic mechanism (**Fig. S7a**). **(c)** CotB2 harboring manually built **cation B** (**scheme 1c**). This complex is able to explain the structural basis for the experimentally observed 1,5-hydride shift of C8 to C15 (**blue line in scheme 1**), as distance between H8 (magenta) and cationic C15 (magenta) is 2.469Å.



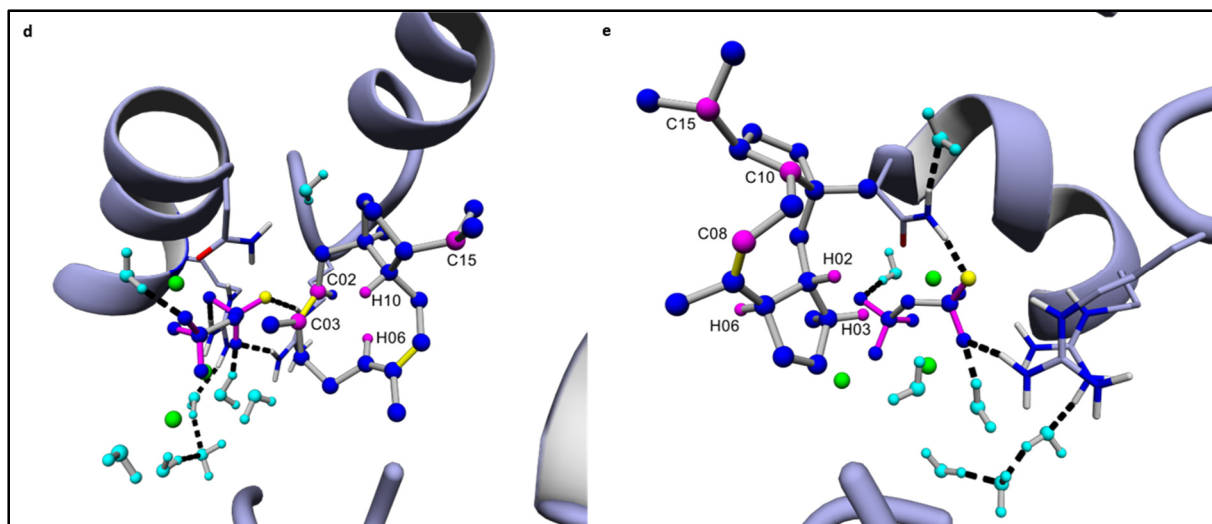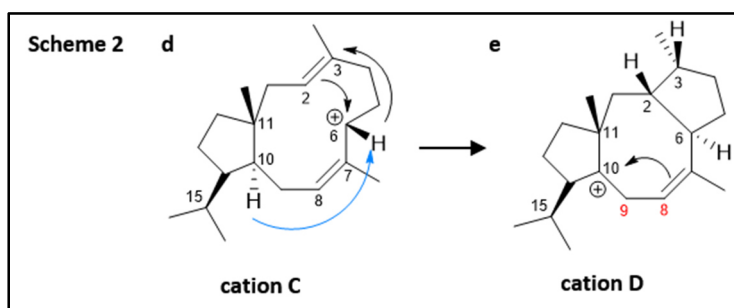

**Fig. S7d: CotB2 harboring cations C and D**

**(d)** CotB2 harboring manually built **cation C** (**scheme 2d**), carbon atoms involved in cyclization to **cation D** are shown in magenta. The complex model shows the  $\Delta_{2,3}$  double bond directly pointing towards C06 and H06 and cationic C06 directly point towards H10. This indicates that the attack of  $\Delta_{2,3}$  on C06 is synchronized with the 1,4-hydride shift H06 $\rightarrow$ C03 while the second 1,5-hydride shift H10 $\rightarrow$ C06 is asynchronously concerted to this event. This leads to the experimentally observed trans-stereochemistry of H02/H06 (**Fig. S7a**). The existence of a delocalized 3-center 2-electron bonding array between C03, C02 and H06 would be able to explain the synchronized first step. **(e)** CotB2 harboring manually built **cation D** (**scheme 2e**). This complex shows the  $\Delta_{7,8}$   $\pi$ -orbital overlapping with the empty p-orbital of cation C10 leading to the experimentally observed carbon rearrangement of C8 and C9, as shown in **Fig. S7a**, **Fig. S7e** and **scheme 3f-g**.

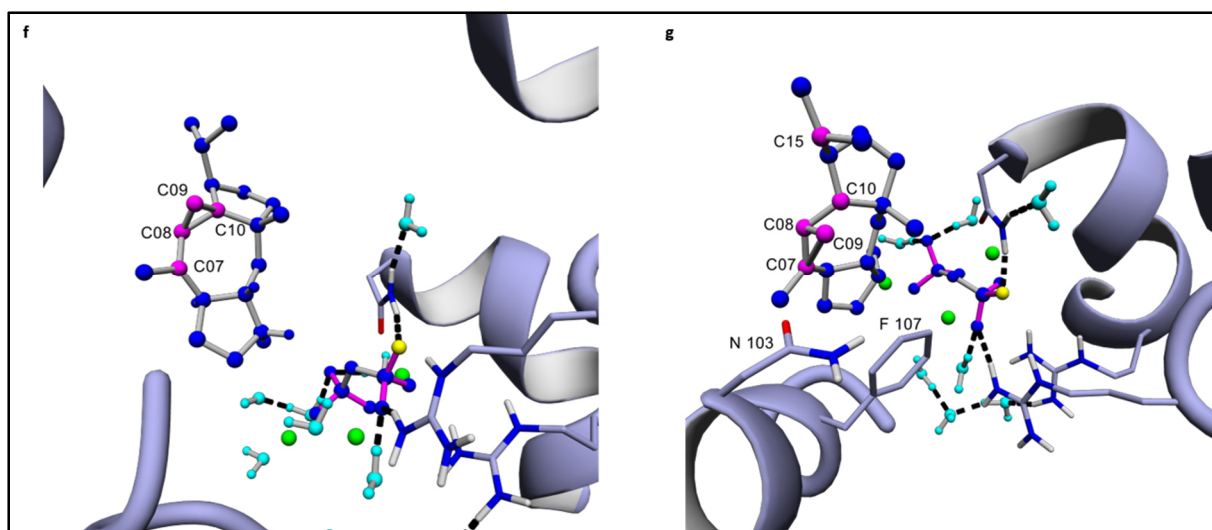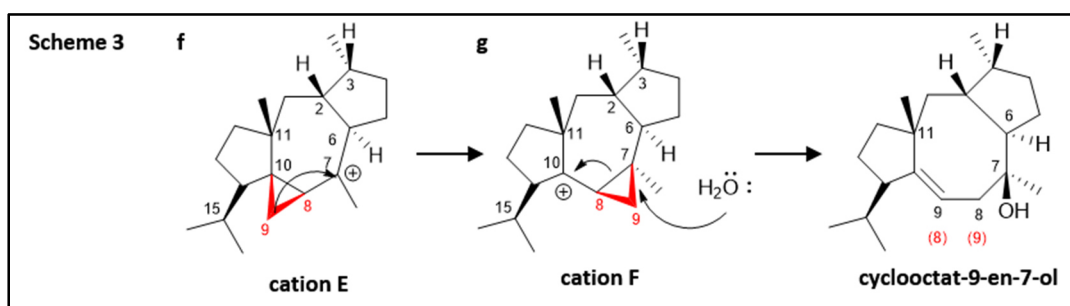

**Fig. S7e: CotB2 harboring cations E and F**

**(a)** CotB2 harboring manually built **cation E** (**scheme 3f**), carbon atoms involved in the carbon rearrangement of C8 and C9 are shown in magenta. **(b)** CotB2 harboring manually built **cation F** (**scheme 2g**). Amino acid residues in close proximity to C07 that is attacked by an active site bound water molecule, leading to formation of **cyclooctat-9-en-7-ol** (**scheme 3**) are shown.

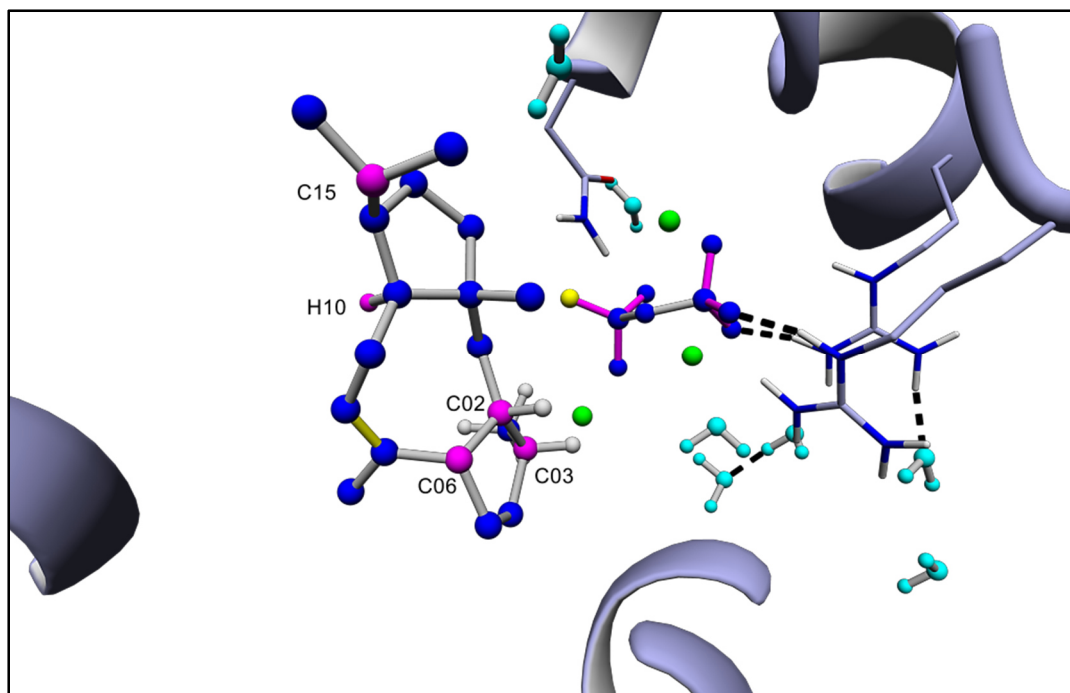

**Fig. S7f: CotB2 harboring the proposed cation E upon QM gas phase calculations** <sup>6</sup>

During the finalization of this manuscript, a QM gas phase study of the CotB2 mechanism based on the NMR-spectroscopic studies was published <sup>6</sup> (Note that the numbering there is different from the numbering in here and also different to the numbering in Meguro et al). The authors corroborate our hypothesis that additional carbocationic intermediates must exist, in addition to the intermediates shown in **Fig. S7a**. Especially during the **cation B**-> **-C** transition and **cation C**-> **-D** transition that included the H10->H06 hydride shift Hong and Tantillo <sup>6</sup> propose a differing cyclization cascade, however in the absence of the protein environment. The QM structure of cation E shown in their study demonstrated a distance of 3.81 Å between H10 and cationic H06 within our CotB2 complex after following their proposed cyclization mechanism (**Fig. S7f**). A structural rearrangement of **cation E** is therefore needed for their proposed **cation E**-> **-F** transition that our model is not able to show. We cannot rule out their shown pathway, thus, in line with them, additional stereo labelling experiments or QM/MM studies including the protein environment have to be conducted to specify the additional carbocation intermediates.

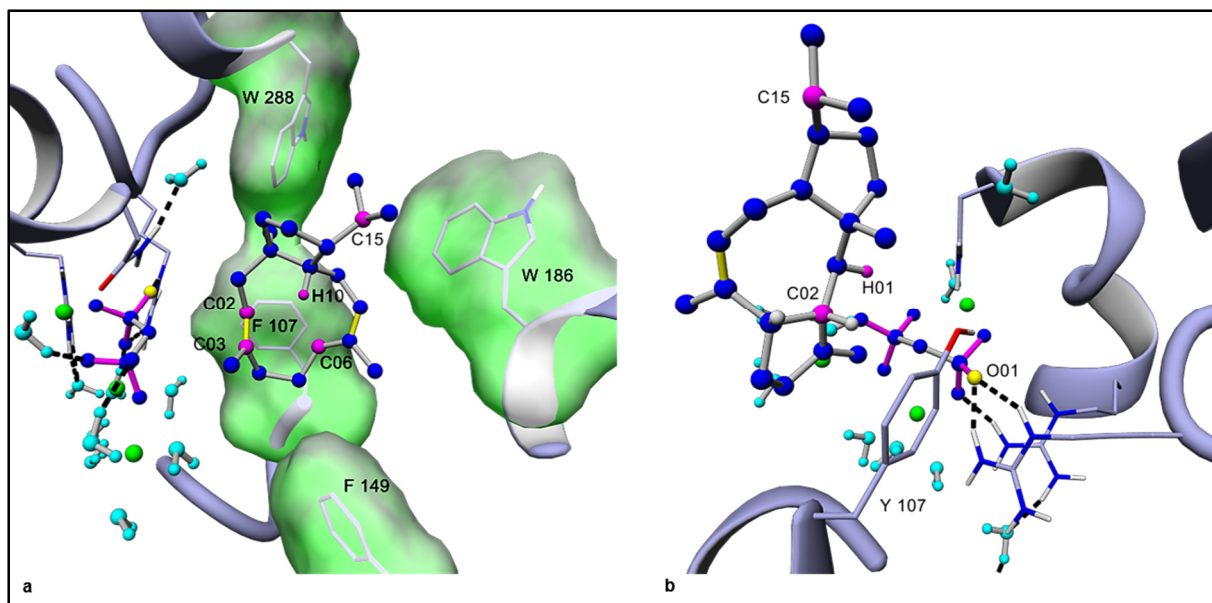

**Fig. S7g: Proposed molecular basis for the recently generated CotB2 mutants 1**<sup>7</sup>

(a) Closed conformation of CotB2 harboring cation C (Fig. S7d, scheme 2). Formation of **cation C** seems to be forced by the space spanned by aromatic residues (F107, F149, W186 and W288). Transition to **cation D** (Fig. S7d, scheme 2) involves a H10→H06 hydride shift based on the proximity of C06 and C10. Substitution of F149 to leucine allows more sterical freedom upon formation of **cation C** that prevents the H10→H06 hydride shift resulting in formation of cyclooctat-7-en-3-ol instead of cyclooctat-9-en-7-ol based on final hydroxylation at C03 in **cation D**.<sup>7</sup> (b) Closed conformation of CotB2-F107Y harboring cation C. This complex suggests that the newly introduced hydroxyl group of Y107 interacts with O01 of the R294-PP<sub>i</sub> bi-functional motif upon formation of **cation C**. Deprotonation of the hydroxyl group of Y107 by R294-PP<sub>i</sub> allows direct proton abstraction of H01, due its proximal positioning, accompanied with the proposed H02→H03 hydride shift<sup>7</sup> resulting in the formation of cyclooctat-1,7-diene.

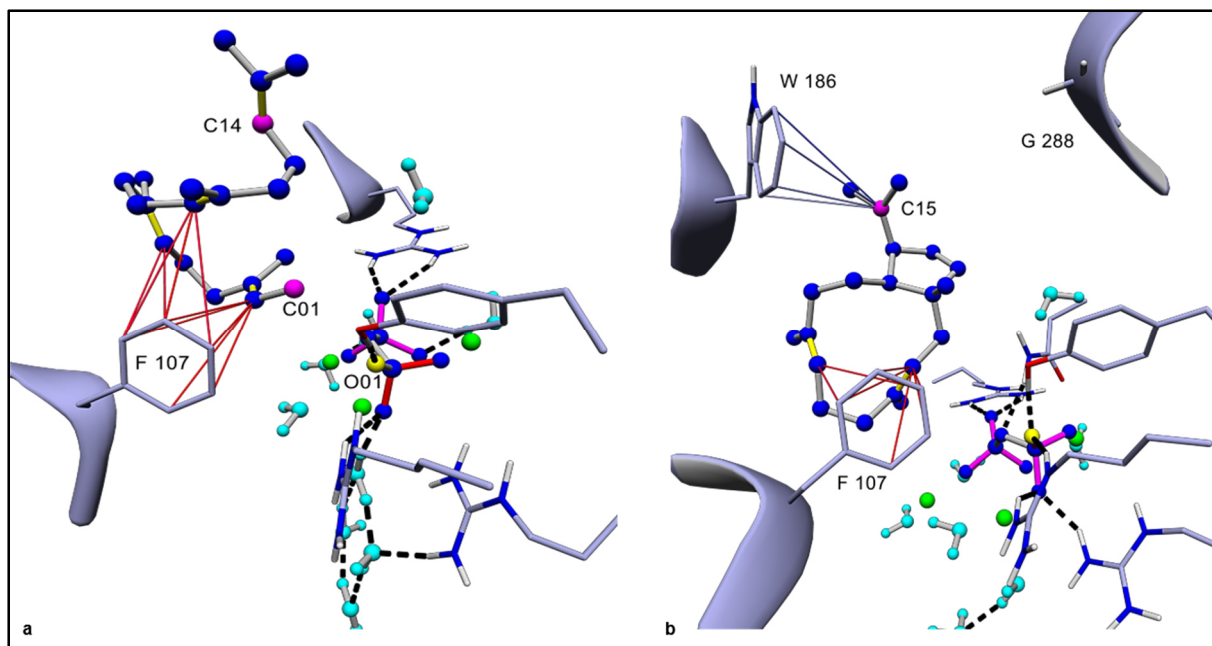

**Fig. S7h: Proposed molecular basis for the recently generated CotB2 mutants 2**<sup>7,8</sup>

**(a)** Closed conformation of CotB2 harboring **cation A** (Fig. S7c, scheme 1). The model demonstrates the importance of F107 in  $\pi$ - $\pi$ -stabilization (red lines) of the first cationic intermediate. Substitution of F107 to alanine abolishes this stabilization resulting in a higher degree of initial **GGPP** misfolding and cation tumbling that leads to the formation of the monocyclic cembrene A.<sup>7,8</sup> **(b)** Closed conformation of CotB2 harboring **cation B** (Fig. S7c, scheme 1). The model indicates that the substitution of W288 to glycine promotes the formation of strong cation- $\pi$  interactions between cationic C15 and W186 in **cation B** in contrast to the wild type. This stabilization is able to explain the formation of the bicyclic dolabella-3,7,18-triene detected upon mutagenesis.<sup>8</sup>

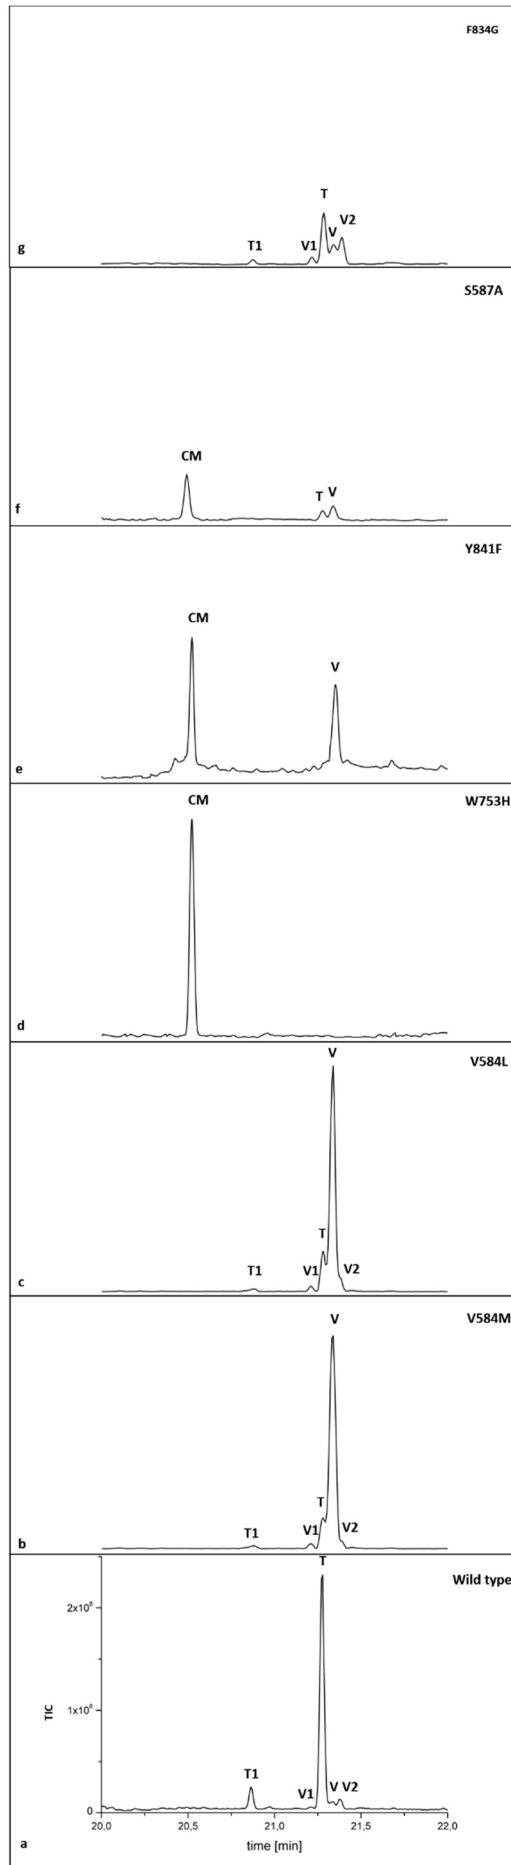

**Fig. S8a: GC-chromatograms of wild type and mutant TXS variants**

GC-chromatograms of (a) Wild type TXS, (b) TXS-V584M, (c) TXS-V584L, (d) TXS-W753H, (e) TXS-Y841F, (f) TXS-S587A and (g) TXS-F834G. **T**: taxa-4,11-diene, **T1**: taxa-4(20),11-diene, **CM**: cembrene A, **V**: verticilla-3,7,12(13)-triene, **V2**: verticilla-3,7,11(12)-triene, **V1**: verticilla-4(20),7,11-triene (% activity in comparison to WT corresponding to **Table 1** and **Table S4**).

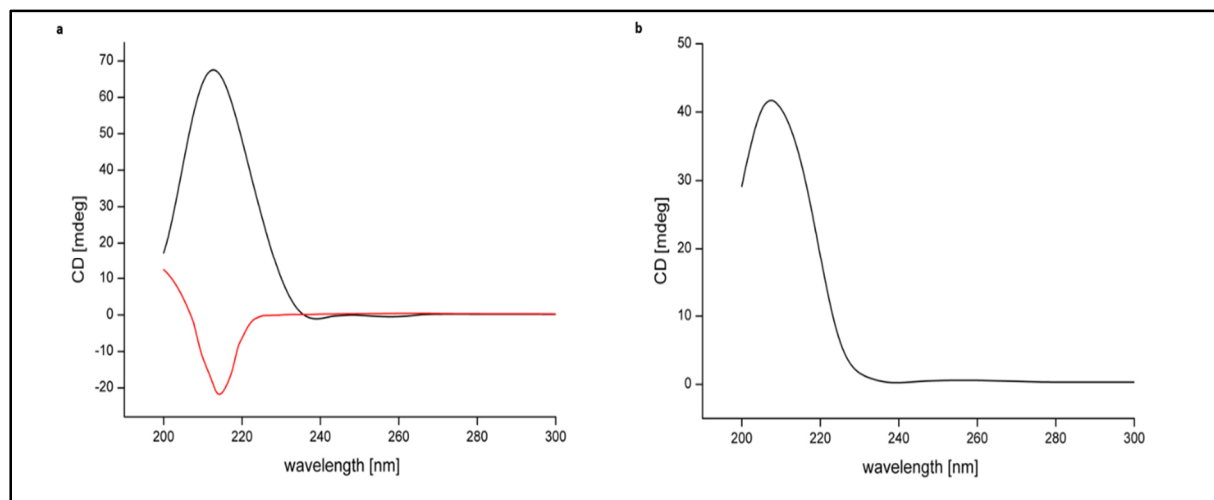

**Fig. S8b: CD-spectra of CM, (+)-cembrene and V**

CD-spectra of (a) (+)-cembrene (black line) and **CM** (red line), (b) CD-spectrum of **V** (black line).

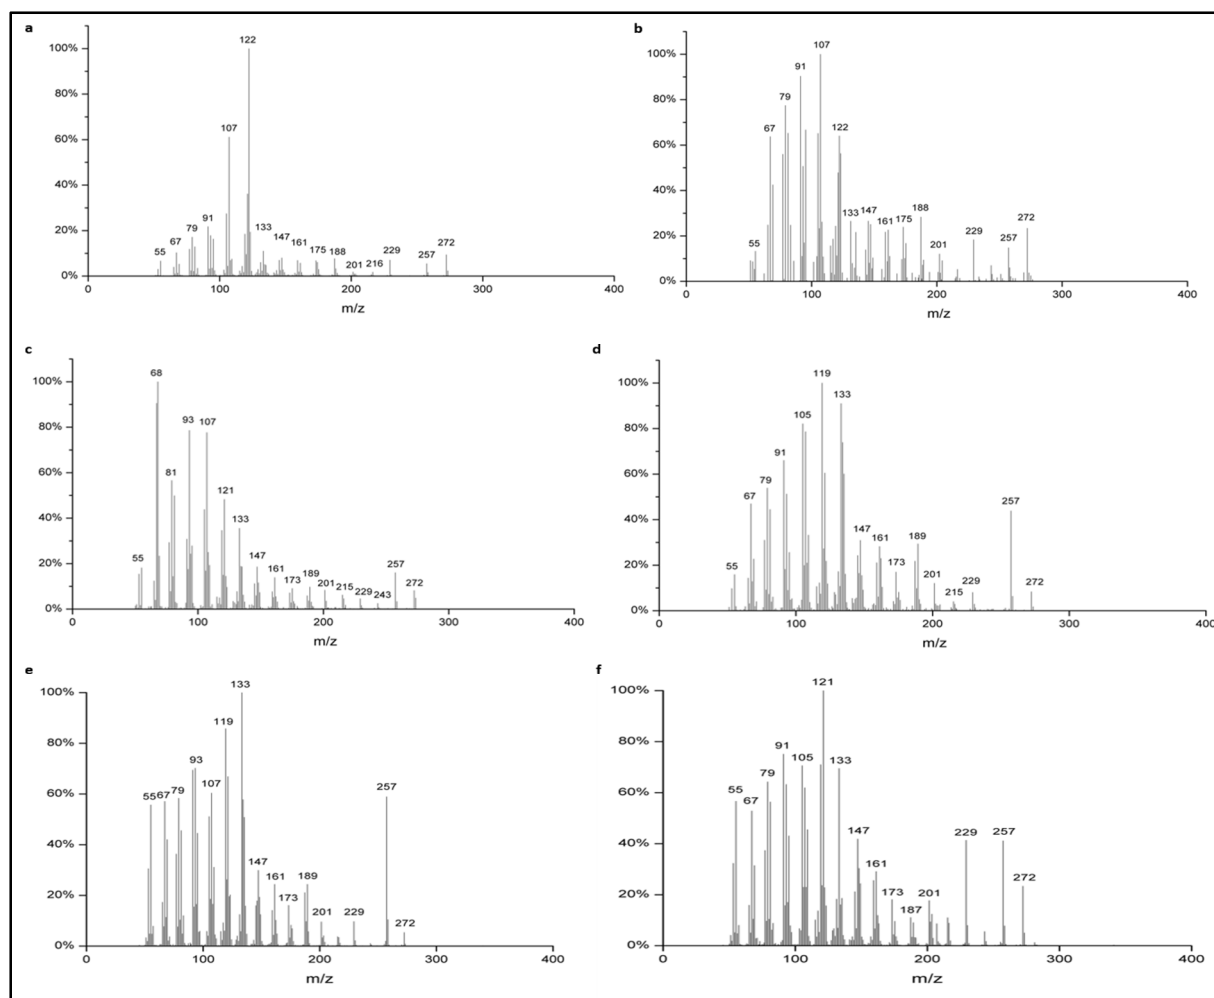

**Fig. S8c: MS-Spectra of deprotonated intermediates CM, V, V1, V2, T and T1**

Mass spectra of deprotonated intermediates according to **Fig. 1**. **(a) T:** taxa-4,11-diene (Retention time (RT) in gas chromatogram (**Fig. S8a**): 21,28 min), **(b) T1:** taxa-4(20),11-diene (RT: 20,87 min), **(c) CM:** cembrene A (RT: 20,56 min), **(d) V:** verticilla-3,7,12(13)-triene (RT: 21,33 min), **(e) V1:** verticilla-4(20),7,11-triene (RT: 21,20 min), **(f) V2:** verticilla-3,7,11(12)-triene (RT: 21,37).



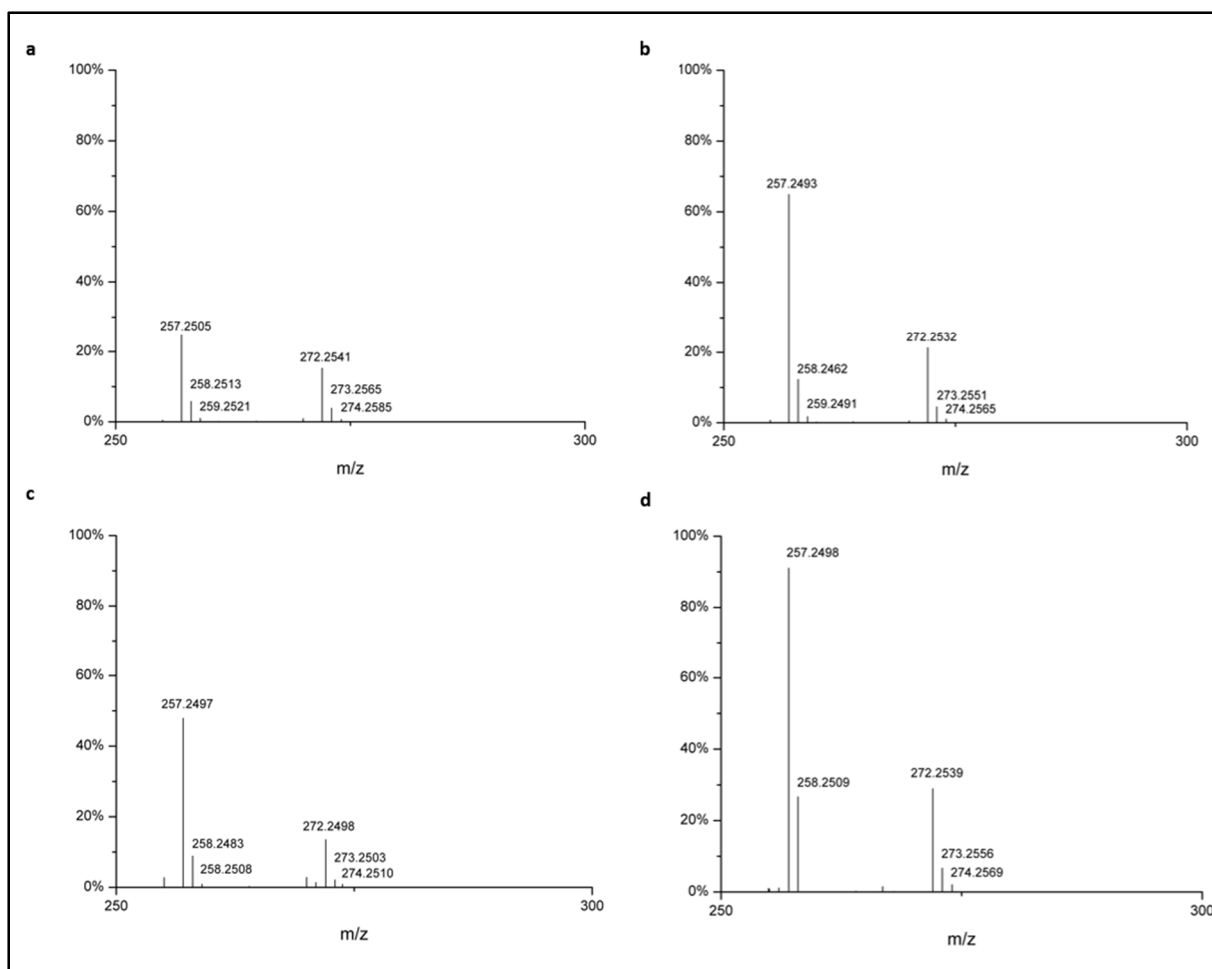

**Fig. S8d: HR-MS-Spectra of deprotonated intermediates CM, V, V1 and V2**

High resolution mass spectra of deprotonated intermediates according to **Fig. 1**. **(a) CM**: cembrene A, ( $m/z$   $C_{20}H_{32}$  calculated: 272.2504), **(b) V**: verticilla-3,7,12(13)-triene, ( $m/z$   $C_{20}H_{32}$  calculated: 272.2504), **(c) V2**: verticilla-3,7,11(12)-triene, ( $m/z$   $C_{20}H_{32}$  calculated: 272.2504), **(d) V1**: verticilla-4(20),7,11-triene, ( $m/z$   $C_{20}H_{32}$  calculated: 272.2504).

| NMR spectral data for (-)-( <i>R</i> )-cembrene A |                  |                                 |                                      |
|---------------------------------------------------|------------------|---------------------------------|--------------------------------------|
| W753H                                             |                  |                                 | ( <i>R</i> )-cembrene A <sup>9</sup> |
| #                                                 | $\delta_C$ (ppm) | $\delta_H$ (ppm), <i>J</i> (Hz) | $\delta_C$ (ppm)                     |
| 1                                                 | 46.1             | 2.04 (m)                        | 45.98                                |
| 2                                                 | 32.55            | 1.99 (m)                        | 32.43                                |
| 3                                                 | 121.9            | 5.06 (t, <i>J</i> = 6.1)        | 121.87                               |
| 4                                                 | 134.0            | n/a                             | 133.91                               |
| 5                                                 | 39.1             | 2.03 (m)                        | 38.94                                |
| 6                                                 | 25.0             | 2.17 (m)                        | 24.89                                |
| 7                                                 | 124.1            | 5.19 (t, <i>J</i> = 7.2)        | 124.07                               |
| 8                                                 | 134.9            | n/a                             | 134.79                               |
| 9                                                 | 39.5             | 2.07 (m)                        | 39.41                                |
| 10                                                | 23.8             | 2.10 (m)                        | 23.76                                |
| 11                                                | 126              | 4.98 (t, <i>J</i> = 6.2)        | 125.90                               |
| 12                                                | 133.5            | n/a                             | 133.43                               |
| 13                                                | 34.0             | 2.13 (m)                        | 33.99                                |
| 14                                                | 28.2             | 1.96 (m)                        | 28.22                                |
| 15                                                | 149.4            | n/a                             | 149.29                               |
| 16                                                | 19.4             | 1.66 (s)                        | 19.31                                |
| 17                                                | 110.2            | 4.65 (s), 4.71 (s)              | 110.10                               |
| 18                                                | 18.1             | 1.56 (s)                        | 17.99                                |
| 19                                                | 15.4             | 1.59 (s)                        | 15.25                                |
| 20                                                | 15.6             | 1.57 (s)                        | 15.48                                |

Fig. S8e: NMR spectral data of CM

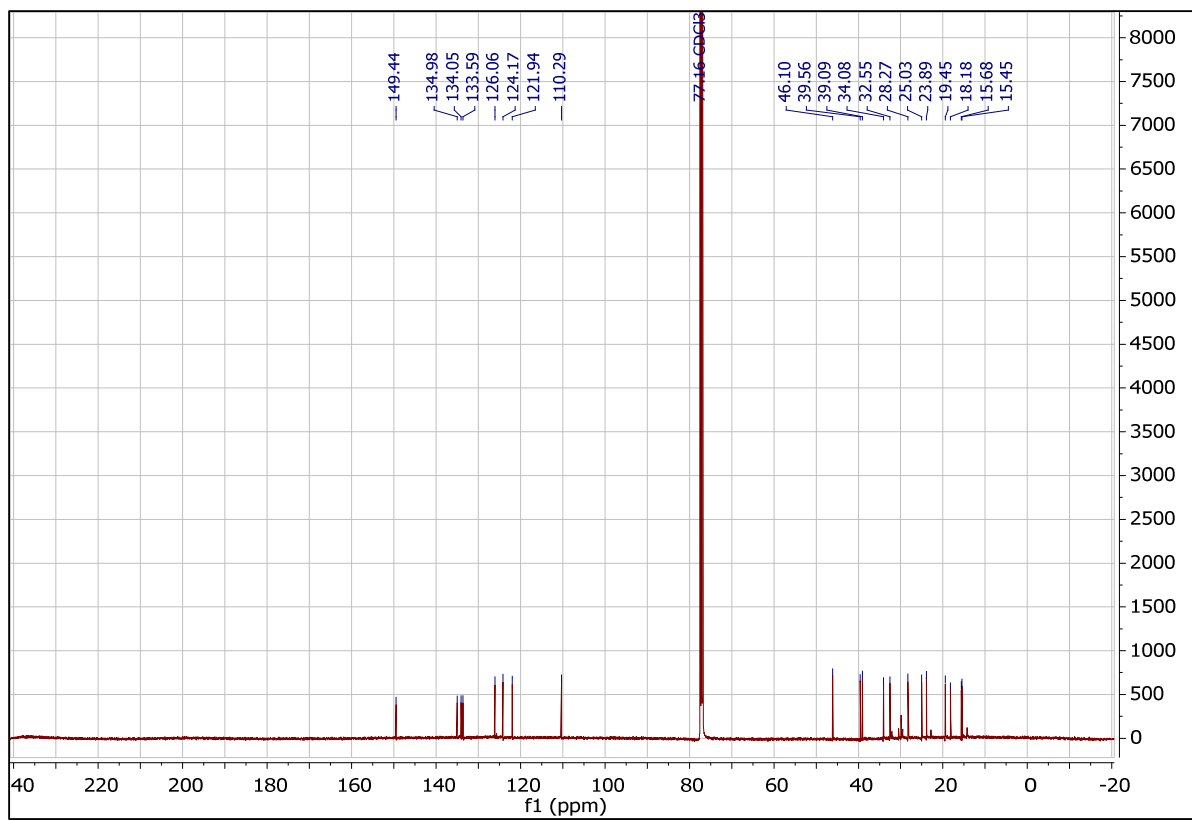

Fig. S8f: 13-C Spectrum of CM

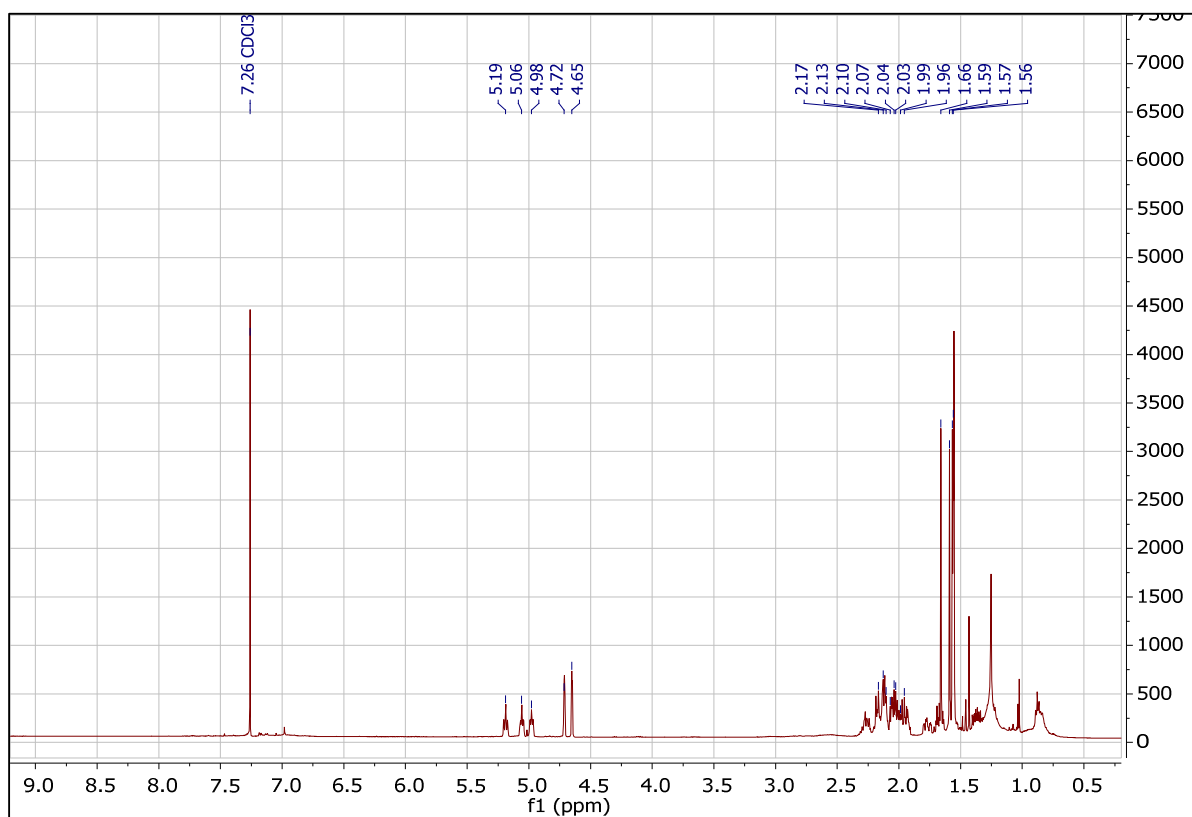

Fig. S8g: 1-H Spectrum of CM

(a) NMR spectral data for (+)-(R, R)-verticilla-  
3,7,12(13)-triene

V584M/L

| #  | $\delta_C$ (ppm) | $\delta_H$ (ppm), J (Hz) | HMBC       | NOESY              |
|----|------------------|--------------------------|------------|--------------------|
| 1  | 42.5             | 1.51                     | 16, 17     |                    |
| 2  | 34.3             | 1.84, 2.64               | 1          | 1, 17, 20,         |
| 3  | 124.8            | 5.29 (br d, J = 11.9)    | 2, 20      | 5, 7, 11, 14, 18   |
| 4  | 132.8            | n/a                      | 20         |                    |
| 5  | 41.1             | 2.02, 2.17               | 6, 20      |                    |
| 6  | 26.8             | 1.99, 2.44               | 5          | 5                  |
| 7  | 130.0            | 4.83 (br d, J = 12.0)    | 6, 19      | 3, 5, 6, 9, 11, 18 |
| 8  | 133.1            | n/a                      | 19         |                    |
| 9  | 39.7             | 1.96, 2.16               | 10, 11     |                    |
| 10 | 21.6             | 1.37, 1.67               | 9, 16      |                    |
| 11 | 38.2             | 2.97                     | 10, 16, 17 | 18, 3, 7           |
| 12 | 136.0            | n/a                      | 10, 14     |                    |
| 13 | 121.8            | 5.39 (br s)              | 14         | 14, 18             |
| 14 | 30.9             | 1.87, 2.47               | 1          | 2                  |
| 15 | 35.8             | n/a                      | 1, 16, 17  |                    |
| 16 | 27.3             | 0.74 (br s)              | 17         |                    |
| 17 | 23.8             | 0.81 (br s)              | 16         |                    |
| 18 | 23.1             | 1.76 (br s)              | 10, 11     |                    |
| 19 | 15.9             | 1.50 (br s)              | 9          | 6, 2               |
| 20 | 15.4             | 1.58 (br s)              | 2          | 6                  |

(b)

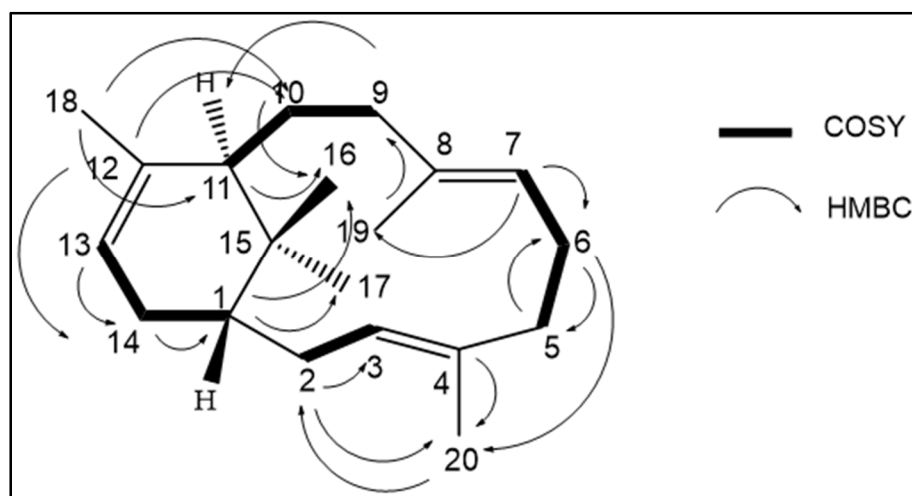

**Fig. S9a: NMR Spectral data of V**

(a) NMR Spectra table of V. (b) Structure of V showing selected key correlations in the COSY and HMBC NMR spectra.

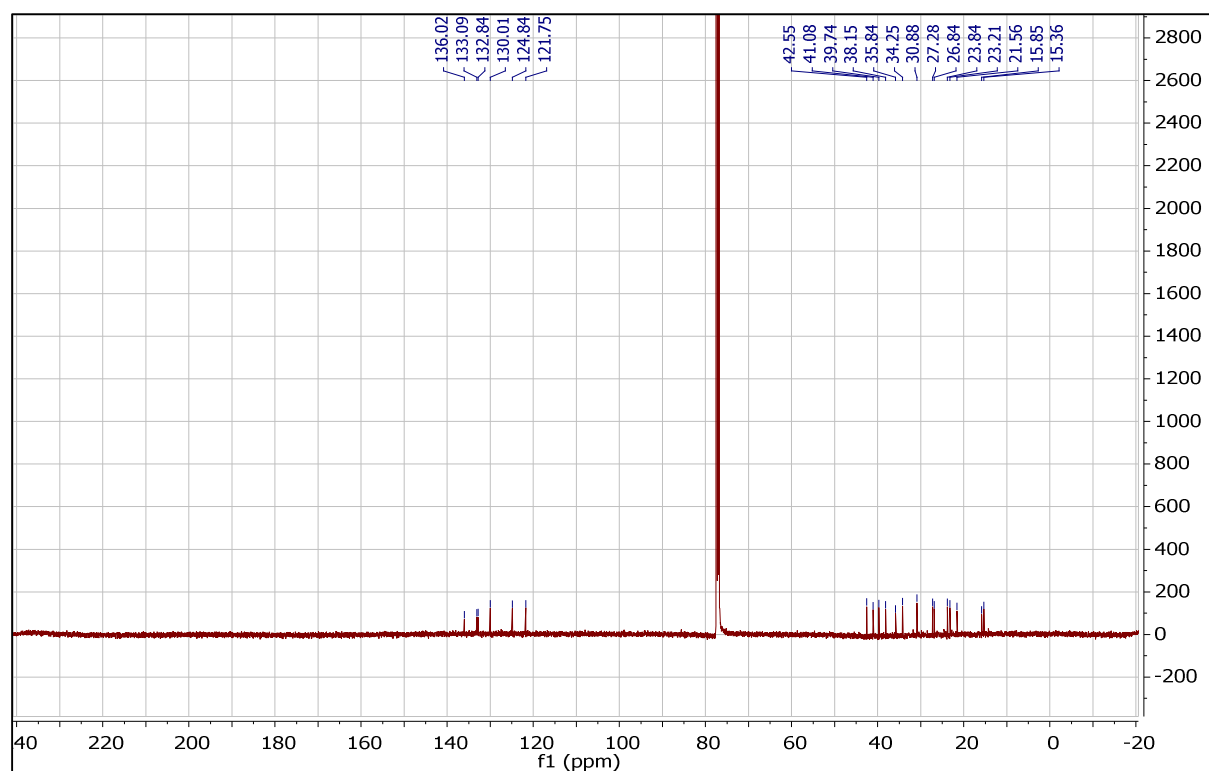

**Fig. S9b: <sup>13</sup>C Spectrum of V**

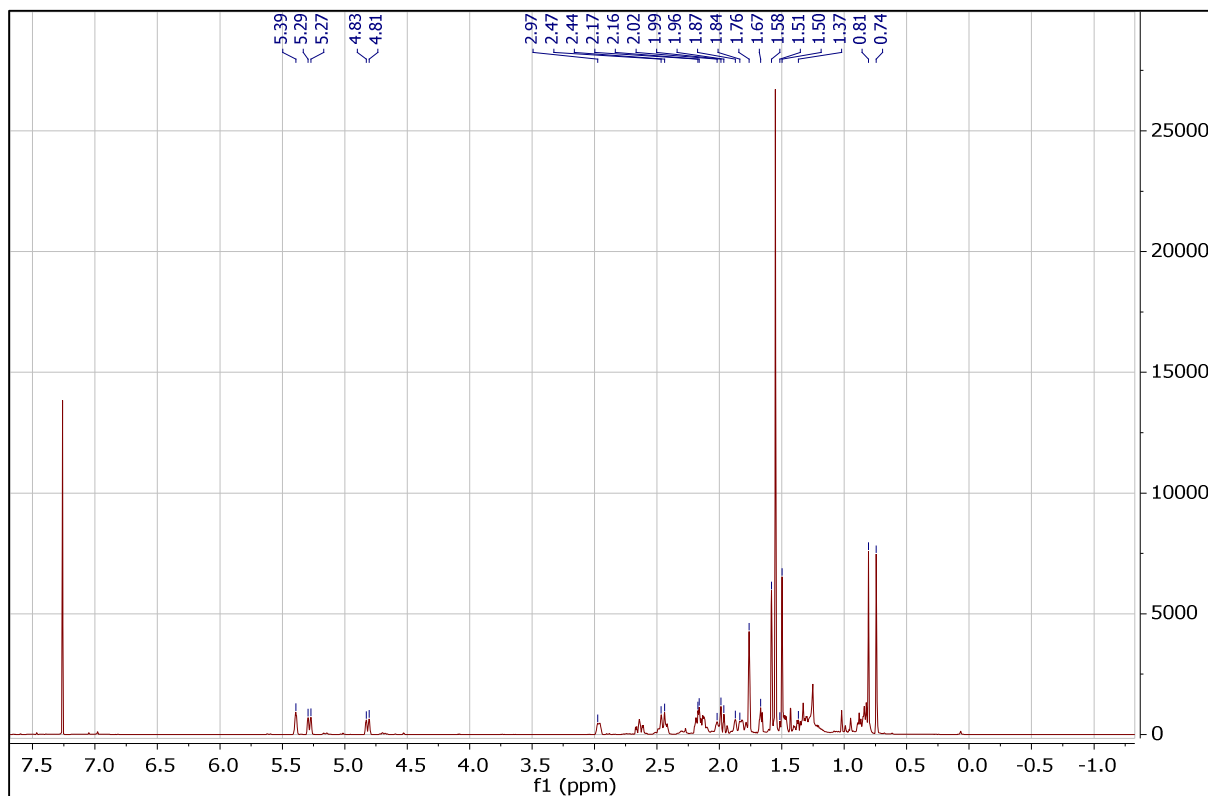

Fig. S9c: 1H-Spectrum of V

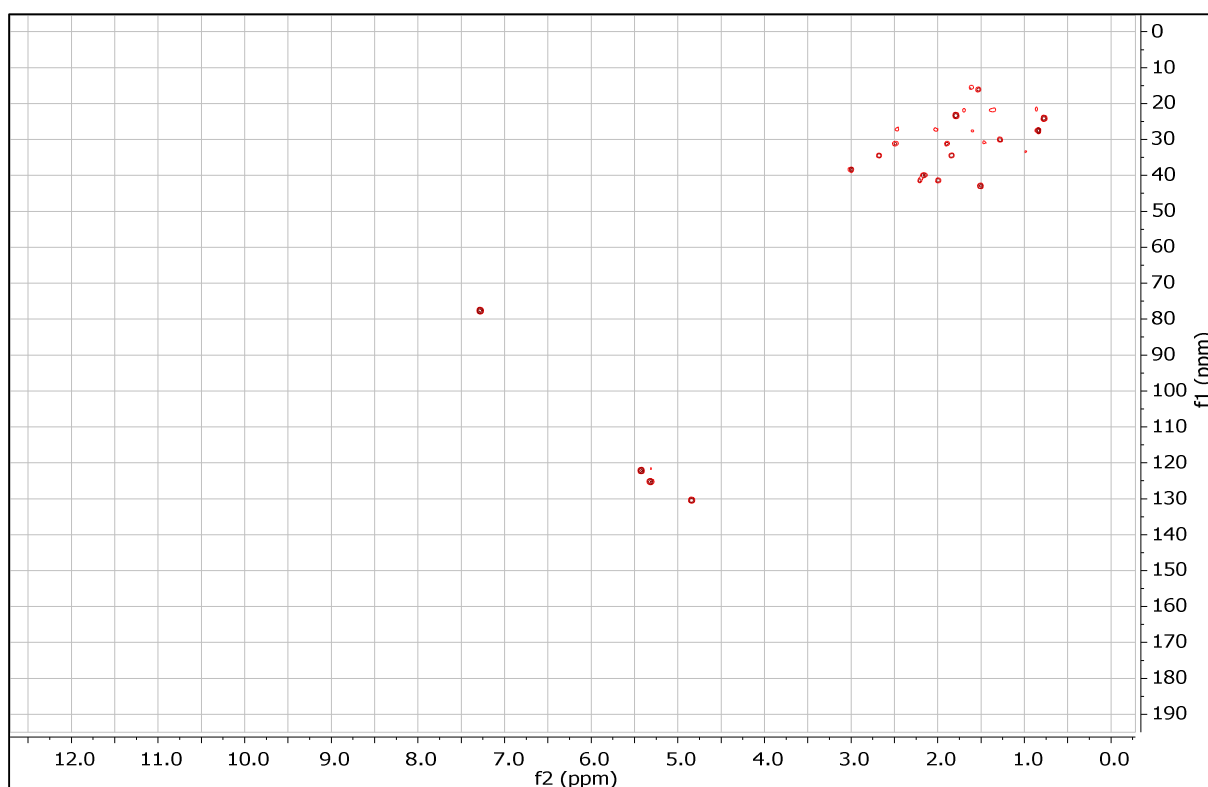

Fig. S9d: HSQC Spectrum of V

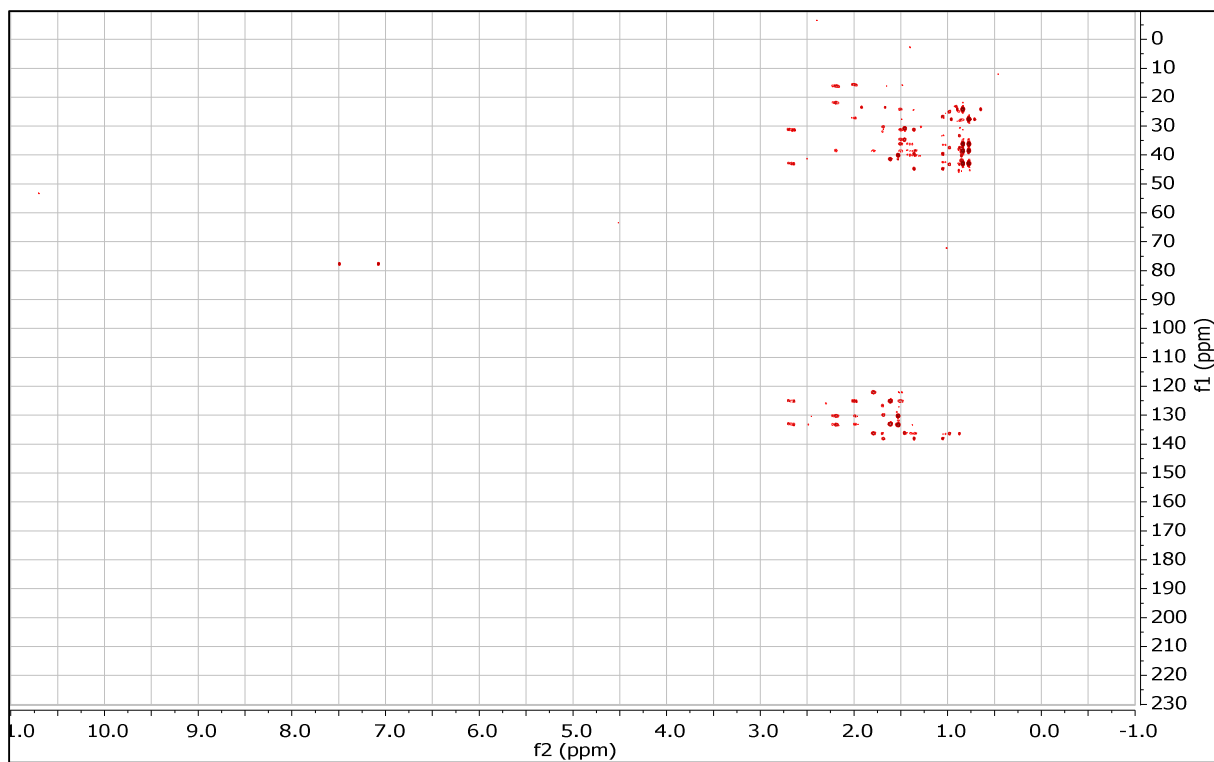

Fig. S9e: HMBC Spectrum of V

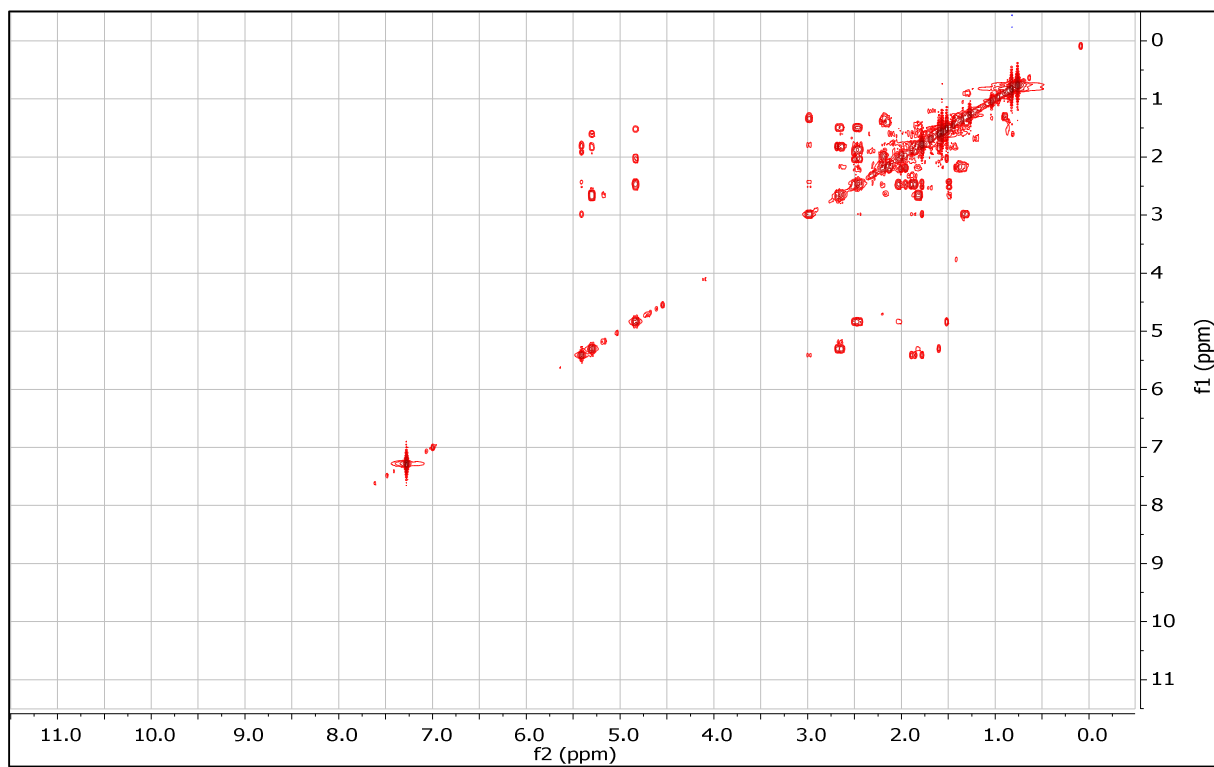

Fig. S9f: COSY Spectrum of V

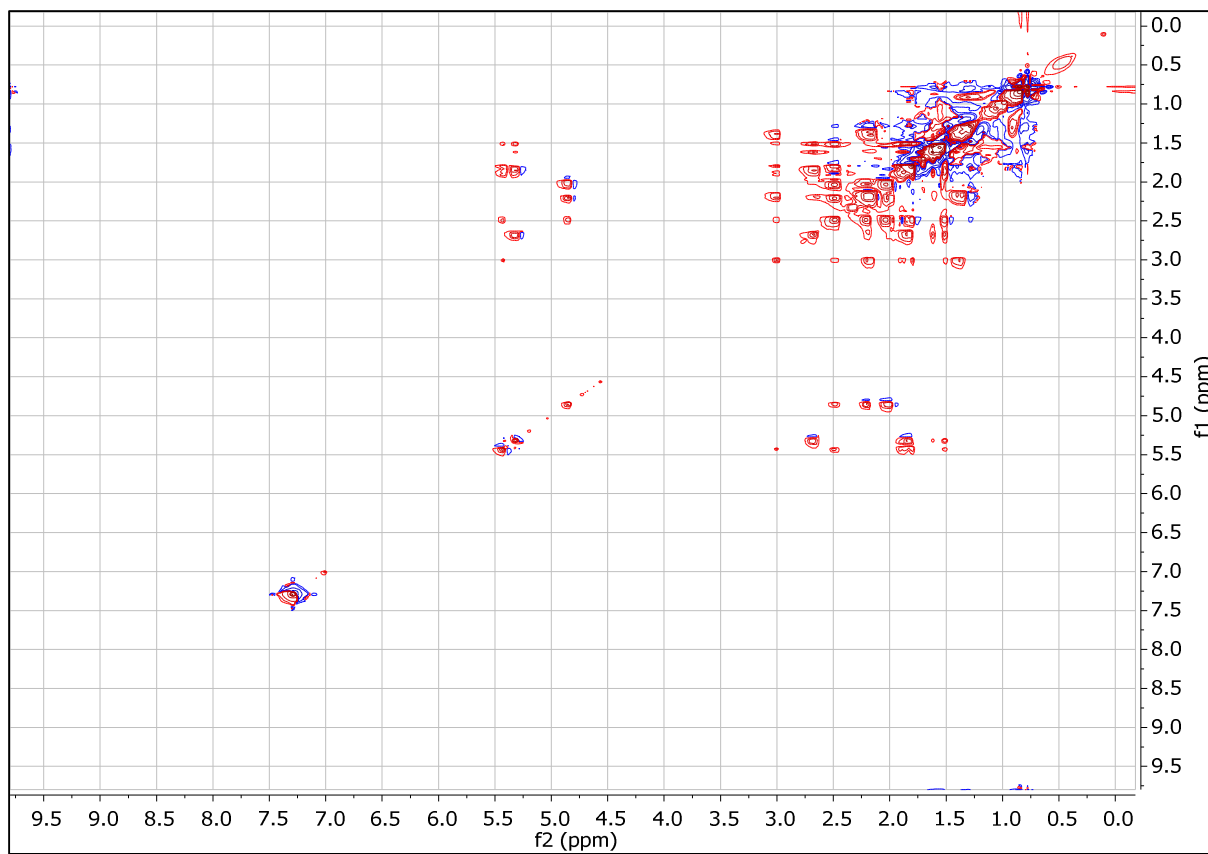

Fig. S9g: TOCSY Spectrum of V



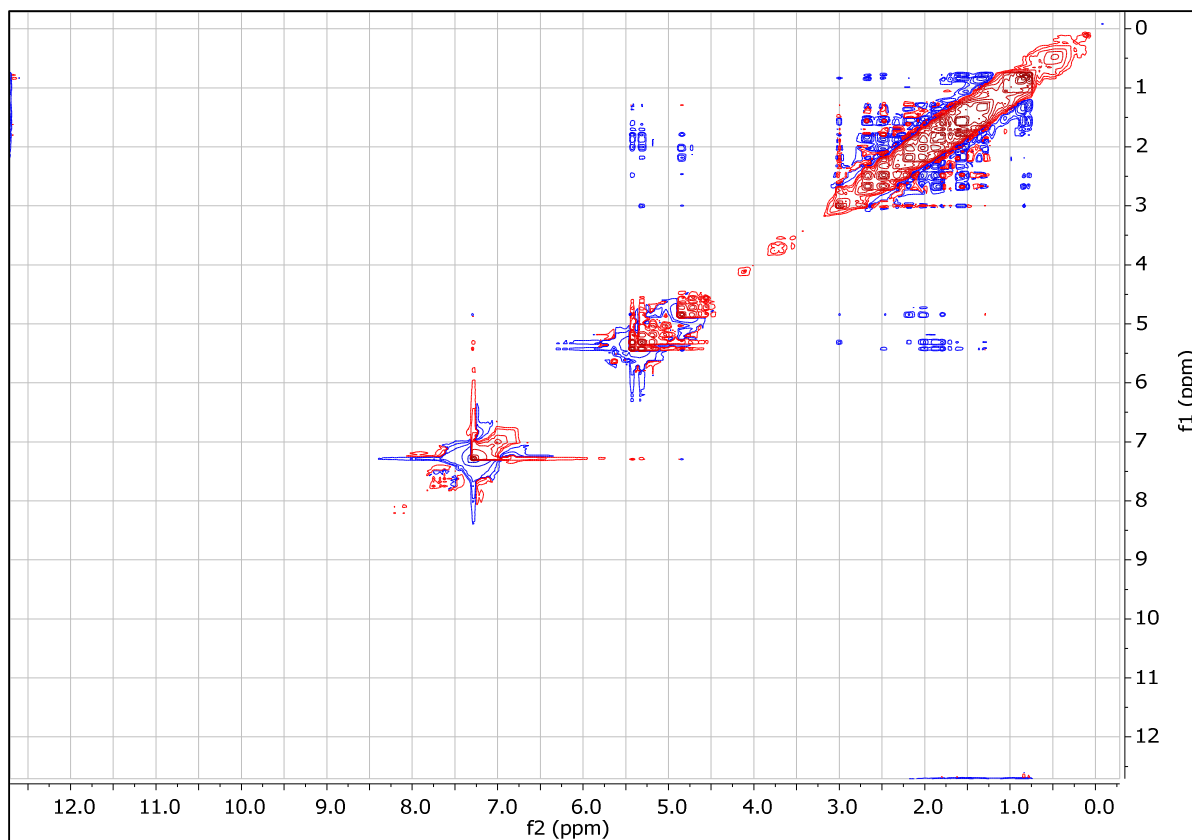

Fig. S9h: NOESY Spectrum of V

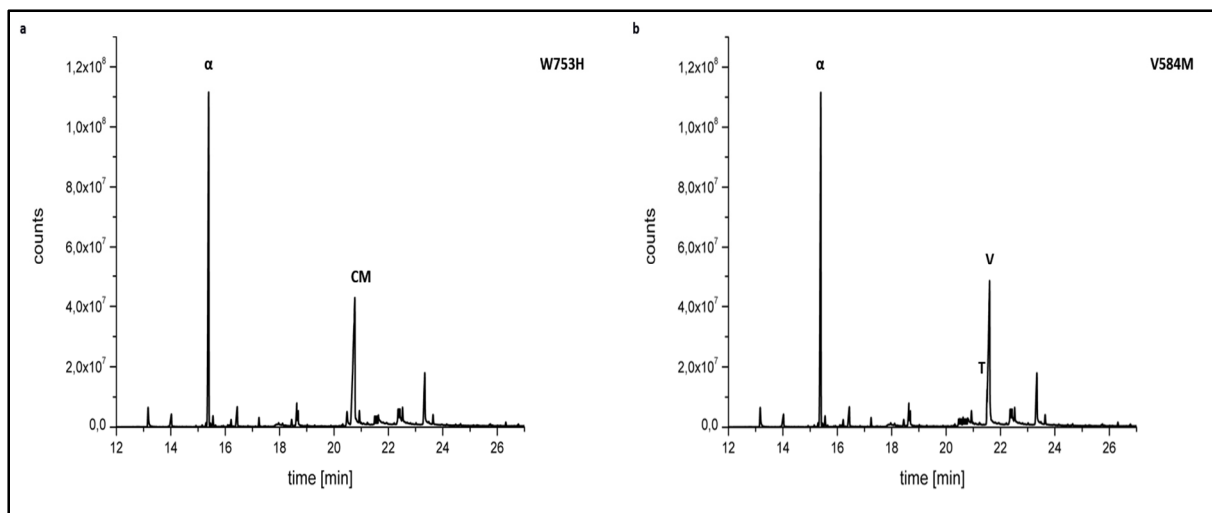

**Fig. S10a: GC-FID Spectra of batch bioprocess supernatants of TXS-W753H and TXS-V584M**

**(a)** GC-FID spectrum of the extracted supernatant (500ml) of the batch bioprocess of TXS-W753H. ( $\alpha$ : alpha humulene, **CM**: cembrene A). **(b)** GC-FID spectrum of the extracted supernatant (500ml) of the batch bioprocess of TXS-V584M. ( $\alpha$ : alpha humulene, **V**: verticilla-3,7,12(13)-triene, **T**: taxa-4,11-diene).

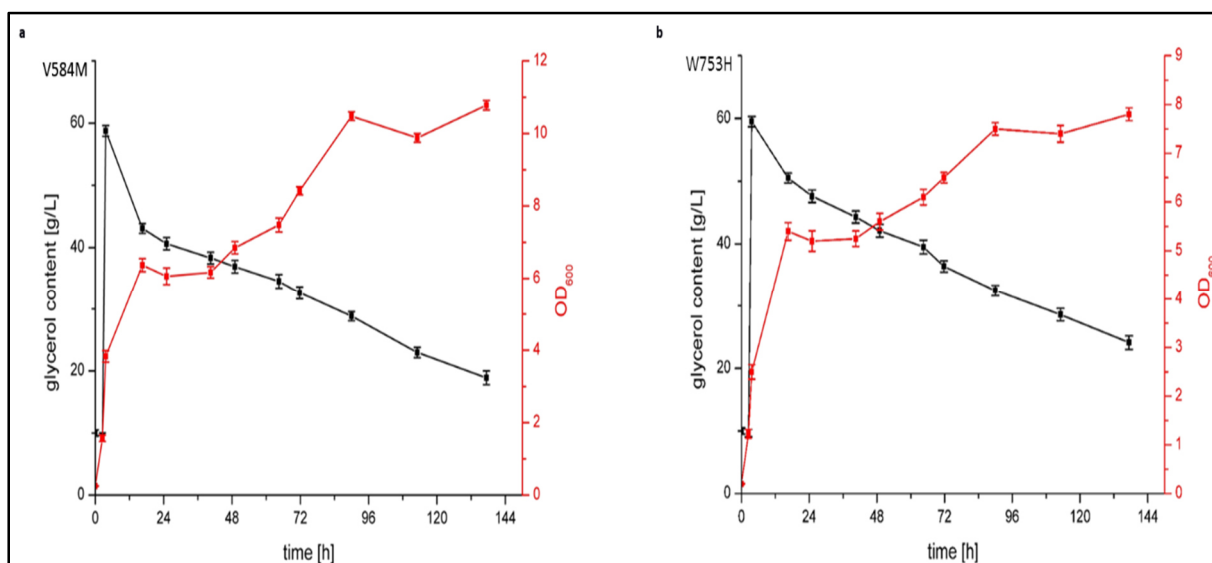

**Fig. S10b: Batch bioprocess characteristics of TXS-W753H and TXS-V584M**

**(a)** Time course of glycerol content (black line) and  $OD_{600}$  during the 30L batch fermentation process of TXS-V584M-*in vivo* production system with glycerol as sole carbon source. **(b)** Time course of glycerol content (black line) and  $OD_{600}$  during the 30L batch fermentation process of TXS-W753H-*in vivo* production system with glycerol as sole carbon source.

|                  | Predicted free energy of binding for the cationic ligand with lowest dissociation constant in the respective cluster [kcal mol <sup>-1</sup> ] | Dissociation constant for the cationic ligand with highest predicted free energy of binding in the respective cluster [pM] | Free energy of binding spread of cationic ligands in the respective clusters [kcal mol <sup>-1</sup> ] (average and standard deviation) |
|------------------|------------------------------------------------------------------------------------------------------------------------------------------------|----------------------------------------------------------------------------------------------------------------------------|-----------------------------------------------------------------------------------------------------------------------------------------|
| <b>Cation A</b>  |                                                                                                                                                |                                                                                                                            |                                                                                                                                         |
| Cluster          |                                                                                                                                                |                                                                                                                            |                                                                                                                                         |
| 1                | 8.4720                                                                                                                                         | 616512.1875                                                                                                                | 8.472 +- 0.0                                                                                                                            |
| <b>2</b>         | <b>7.8910</b>                                                                                                                                  | <b>1643691.5000</b>                                                                                                        | <b>7.891 +- 0.0</b>                                                                                                                     |
| <b>Cation B</b>  |                                                                                                                                                |                                                                                                                            |                                                                                                                                         |
| Cluster          |                                                                                                                                                |                                                                                                                            |                                                                                                                                         |
| 1                | 10.2850                                                                                                                                        | 28906.4688                                                                                                                 | 9.3118 +- 0.5918                                                                                                                        |
| <b>2</b>         | <b>8.6750</b>                                                                                                                                  | <b>437663.8750</b>                                                                                                         | <b>8.1593 +- 0.4584</b>                                                                                                                 |
| <b>TS B-C</b>    |                                                                                                                                                |                                                                                                                            |                                                                                                                                         |
| Cluster          |                                                                                                                                                |                                                                                                                            |                                                                                                                                         |
| 1                | 10.0050                                                                                                                                        | 46370.0703                                                                                                                 | 6.9122 +- 2.4141                                                                                                                        |
| <b>2</b>         | <b>7.9690</b>                                                                                                                                  | <b>1440938.8750</b>                                                                                                        | <b>6.7142 +- 1.6325</b>                                                                                                                 |
| <b>Cation C</b>  |                                                                                                                                                |                                                                                                                            |                                                                                                                                         |
| Cluster          |                                                                                                                                                |                                                                                                                            |                                                                                                                                         |
| 1                | 9.3070                                                                                                                                         | 150618.5781                                                                                                                | 7.5646 +- 1.2115                                                                                                                        |
| <b>2</b>         | <b>8.4770</b>                                                                                                                                  | <b>611331.2500</b>                                                                                                         | <b>7.3673 +- 0.8611</b>                                                                                                                 |
| <b>Cation F</b>  |                                                                                                                                                |                                                                                                                            |                                                                                                                                         |
| Cluster          |                                                                                                                                                |                                                                                                                            |                                                                                                                                         |
| <b>1</b>         | <b>10.0840</b>                                                                                                                                 | <b>40581.6758</b>                                                                                                          | <b>7.1243 +- 2.0671</b>                                                                                                                 |
| <b>Cation D1</b> |                                                                                                                                                |                                                                                                                            |                                                                                                                                         |
| Cluster          |                                                                                                                                                |                                                                                                                            |                                                                                                                                         |
| 1                | 9.1340                                                                                                                                         | 201692.2500                                                                                                                | 7.4407 +- 1.1357                                                                                                                        |
| <b>2</b>         | <b>8.1720</b>                                                                                                                                  | <b>1022926.8750</b>                                                                                                        | <b>6.8544 +- 1.5005</b>                                                                                                                 |
| <b>Cation D2</b> |                                                                                                                                                |                                                                                                                            |                                                                                                                                         |
| Cluster          |                                                                                                                                                |                                                                                                                            |                                                                                                                                         |
| 1                | 9.1340                                                                                                                                         | 201692.2500                                                                                                                | 7.0101 +- 1.6486                                                                                                                        |
| <b>2</b>         | <b>9.0110</b>                                                                                                                                  | <b>248227.2344</b>                                                                                                         | <b>6.7997 +- 1.7352</b>                                                                                                                 |
| <b>Cation E</b>  |                                                                                                                                                |                                                                                                                            |                                                                                                                                         |
| Cluster          |                                                                                                                                                |                                                                                                                            |                                                                                                                                         |
| <b>1</b>         | <b>11.3550</b>                                                                                                                                 | <b>4749.7925</b>                                                                                                           | <b>6.7744 +- 2.4352</b>                                                                                                                 |
| 2                | 7.9450                                                                                                                                         | 1500506.1250                                                                                                               | 6.7014 +- 1.0455                                                                                                                        |

**Table S3: Cluster analyses of docked QM-carbocations into the transient enzyme intermediate complexes**

Cluster analyses of **QM-cations A-E** and **-TS B-C** docked into their corresponding transient enzyme intermediate complexes according to methods part 3 and 4. **Cations A, -B, -C, -D1, -D2, -E** and **TS B-C** exhibit two distinct conformational clusters in their corresponding transient enzyme intermediate complexes. **Cation F** exhibits only one distinct conformation. Two conformations belonged to different clusters, if the ligand RMSD was larger than 2 Å. Only cluster that are distinctly derived from the conformation of unionized **GGPP (cation A)** or the respective former cascade cation (**cation B-E** and **TS B-C**), depicted in red were considered for validation and structural

superposition of the respective manually formed cations. These cationic structures are shown in **Fig. 5 (cation E)**, **Fig. 2c, d** and **Fig. S3a (cation A)**, **Fig. 3a, b (cation B and TS B-C)**, **Fig. 4a and Fig. S3c (cation C)**, **S3e (cation F)**, **S3f (cation D1)** and **S3g (cation D2)**. The conformational cluster that is not structurally derived from unionized GGPP or the respective former cascade cation, depicted in black are shown in **Fig. S3a (cation A)** and **S6 (cation B-E and TS B-C)**. Note that single conformations of **cations F** and **-E** in their respective considered cluster exhibit the overall highest predicted free energies of binding (second column), indicating the most favorable interaction with their respective receptor. This is in line with the assumption that **cations C-E** are not in equilibrium state as suggested by QM gas phase calculations.<sup>10</sup> Instead, it indicates that **cation C->F** transition is an exothermic event and **cation E** is indeed the global energy minimum of the reaction cascade in relation to **cation A**. Moreover, cluster analyses demonstrate that according to the predicted spread in free energies of binding (fourth column) the average predicted free energies of binding of the cationic ligands decrease from **cation B->E** and that **cation A** and **B** exhibit the highest average free energies of binding as well as the lowest standard deviations. This indicates that a high percentage of conformations in the cluster of **cation A** and **B** exhibit a more favorable interaction with the respective receptor than **cations C-E**. This, in turn, is in line with our observation that **cations C->E** suffer from a reduced binding in TXS, resulting in cation tumbling and imprecise barrier crossings that lead to the observed side products derived from these cationic intermediates.

| Target | Mutation | Activity <sup>(a)</sup> | T <sup>(b)</sup> | T1   | CM   | V    | V1   | V2   |
|--------|----------|-------------------------|------------------|------|------|------|------|------|
| TXS    |          | 100,0                   | 93,2             | 4,7  | N.D. | 0,8  | 0,2  | 1,1  |
| Y89    | Y89F     | 0,0                     |                  |      |      |      |      |      |
|        | Y89A     | 0,0                     |                  |      |      |      |      |      |
|        | Y89E     | 2,8                     | 100,0            | N.D. | N.D. | N.D. | N.D. | N.D. |
| R580   | R580H    | 0,0                     |                  |      |      |      |      |      |
|        | R580A    | 0,0                     |                  |      |      |      |      |      |
|        | R580E    | 0,0                     |                  |      |      |      |      |      |
| R754   | R754H    | 0,0                     |                  |      |      |      |      |      |
|        | R754A    | 0,0                     |                  |      |      |      |      |      |
|        | R754E    | 0,0                     |                  |      |      |      |      |      |
| R768   | R768H    | 0,0                     |                  |      |      |      |      |      |
|        | R768A    | 0,0                     |                  |      |      |      |      |      |
|        | R768E    | 0,0                     |                  |      |      |      |      |      |
| V584   | V584M    | 92,3                    | 13,8             | 0,6  | N.D. | 83,4 | 0,8  | 1,4  |
|        | V584K    | 89,1                    | 29,8             | 0,6  | N.D. | 67,4 | 0,8  | 1,4  |
|        | V584L    | 92,1                    | 13,8             | 0,6  | N.D. | 83,4 | 0,8  | 1,4  |
|        | V584N    | 0,0                     |                  |      |      |      |      |      |
|        | V584S    | 0,0                     |                  |      |      |      |      |      |
|        | V584P    | 0,0                     |                  |      |      |      |      |      |
|        | V584R    | 0,0                     |                  |      |      |      |      |      |
| S587   | S587D    | 0,0                     |                  |      |      |      |      |      |
|        | S587Y    | 0,0                     |                  |      |      |      |      |      |
|        | S587K    | 0,0                     |                  |      |      |      |      |      |
|        | S587L    | 0,0                     |                  |      |      |      |      |      |
|        | S587A    | 21,8                    | 8,9              | N.D. | 58,9 | 32,2 | N.D. | N.D. |
|        | S587G    | 0,0                     |                  |      |      |      |      |      |
| F602   | F602W    | 9,0                     | 100,0            | N.D. | N.D. | N.D. | N.D. | N.D. |
|        | F602I    | 22,0                    | 93,4             | 4,9  | N.D. | N.D. | N.D. | 1,7  |
|        | F602A    | 1,0                     | 100,0            | N.D. | N.D. | N.D. | N.D. | N.D. |
| V610   | V610H    | 0,0                     |                  |      |      |      |      |      |
|        | V610S    | 0,0                     |                  |      |      |      |      |      |
|        | V610F    | 0,0                     |                  |      |      |      |      |      |
|        | V610A    | 0,0                     |                  |      |      |      |      |      |
| S713   | S713T    | 97,4                    | 92,7             | 5,1  | N.D. | 1,0  | 0,4  | 0,8  |
|        | S713A    | 0,0                     |                  |      |      |      |      |      |
|        | S713L    | 0,0                     |                  |      |      |      |      |      |
| V714   | V714T    | 1,2                     | 100,0            | N.D. | N.D. | N.D. | N.D. | N.D. |
|        | V714A    | 8,7                     | 94,3             | 5,7  | N.D. | N.D. | N.D. | N.D. |
|        | V714I    | 10,4                    | 94,1             | 5,9  | N.D. | N.D. | N.D. | N.D. |
|        | V714G    | 0,0                     |                  |      |      |      |      |      |
|        | V714P    | 0,0                     |                  |      |      |      |      |      |

|      |             |      |       |      |       |      |      |      |
|------|-------------|------|-------|------|-------|------|------|------|
| G715 | G715A       | 0,0  |       |      |       |      |      |      |
|      | G715S       | 0,0  |       |      |       |      |      |      |
| S713 | S713T       | 97,4 | N.D.  | N.D. | 100,0 | N.D. | N.D. | N.D. |
|      | S713A       | 0,0  |       |      |       |      |      |      |
|      | S713L       | 0,0  |       |      |       |      |      |      |
| W753 | W753H       | 51,3 | N.D.  | N.D. | 100,0 | N.D. | N.D. | N.D. |
|      | W753L       | 0,0  |       |      |       |      |      |      |
|      | W753V       | 0,0  |       |      |       |      |      |      |
|      | W753E       | 0,0  |       |      |       |      |      |      |
|      | W753C       | 0,0  |       |      |       |      |      |      |
|      | W753H/C830A | 48,5 | N.D.  | N.D. | 100,0 | N.D. | N.D. | N.D. |
|      | W753A       | 0,0  | 93,5  | 4,6  | N.D.  | 0,7  | 0,2  | 1,0  |
| C830 | C830A       | 88,5 | 93,1  | 4,8  | N.D.  | 0,8  | 0,2  | 1,1  |
|      | C830S       | 92,4 | 79,3  | 7,3  | N.D.  | 1,1  | 2,1  | 10,2 |
| F834 | F834A       | 25,6 | 38,3  | 6,5  | N.D.  | 8,8  | 21,9 | 24,5 |
|      | F834G       | 28,3 | 87,4  | 6,1  | N.D.  | 0,8  | 2,5  | 3,2  |
|      | F834Y       | 93,1 |       |      |       |      |      |      |
|      | F834H       | 0,0  |       |      |       |      |      |      |
| Y835 | Y835F       | 3,5  | 100,0 | N.D. | N.D.  | N.D. | N.D. | N.D. |
|      | Y835W       | 0,0  |       |      |       |      |      |      |
|      | Y835A       | 0,0  |       |      |       |      |      |      |
| Y841 | Y841A       | 0,0  |       |      |       |      |      |      |
|      | Y841F       | 41,3 | N.D.  | N.D. | 56,4  | 43,6 | N.D. | N.D. |
|      | Y841T       | 0,0  |       |      |       |      |      |      |

**Table S4: Characterization of TXS and mutants**

(a) Enzyme activities of mutants (in %) in comparison to TXS (= 100%). The activities were determined by peak integration of the enzyme products in relation to the peak area of the internal standard alpha-humulene (methods section 14). (b) Compound numbers **CM-T1** refer to compound numbers in **Fig. 1, Table 1** and **Supplementary Fig. 23**. The tabulated values represent the product distributions in % for TXS and each mutant (sum = 100%). (N.D.: Not detectable)

| TXS Mutant | Sequence 5' -> 3'                             |
|------------|-----------------------------------------------|
|            |                                               |
| Fw_R580H   | CTTTACCCGTCATCATGTTGCCGAAGTG                  |
| Rv_R580H   | CACTTCGGCAACATGATGACGGGTAAAG                  |
| Fw_R580A   | GATATTAACCTTACCCGTCATGCCGTTGCCGAAGTGATTTTAG   |
| Rv_R580A   | CTAAAATACACTTCGGCAACGGCATGACGGGTAAAGTTAATATC  |
| Fw_R580E   | GATATTAACCTTACCCGTCATGAGGTTGCCGAAGTGATTTTAGC  |
| Rv_R580E   | GCTAAAATACACTTCGGCAACCTCATGACGGGTAAAGTTAATATC |
| Fw_R754H   | GTAAGCCTGAGCTGGCATCTGACCAATGATAC              |
| Rv_R754H   | GTATCATTGGTCAGATGCCAGCTCAGGCTTAC              |
| Fw_R754A   | GGTAAGCCTGAGCTGGGCGCTGACCAATGATACC            |
| Rv_R754A   | GGTATCATTGGTCAGCGCCAGCTCAGGCTTACC             |
| Fw_R754E   | GAGCTTGATCCTTGAGCTGGGAACAAACGACACCAAAC        |
| Rv_R754E   | GTTTTGGTGTGTTTTGTTAGTCCAGCTCAAGGATACAAGCTC    |
| Fw_R768H   | CAGGCTGAAAAGGCTCATGGACAACAAGCCTCAG            |
| Rv_R768H   | CTGAGGCTTGTGTCCATGAGCCTTTTCAGCCTG             |
| Fw_R768A   | CAGGCTGAAAAGGCTGCGGGACAACAAGCCTC              |
| Rv_R768A   | GAGGCTTGTGTCCCGCAGCCTTTTCAGCCTG               |
| Fw_R768E   | CAGGCTGAAAAGGCTGAAGGACAACAAGCCTC              |
| Rv_R768E   | GAGGCTTGTGTCTTCAGCCTTTTCAGCCTG                |
| Fw_V584M   | GACACCGAGTGGCGGAGATGTATTTTTCATCAGCTAC         |
| Rv_V584M   | GTAGCTGATGAAAAATACATCTCCGCCACTCGGTGTC         |
| Fw_V584K   | CGACACCGAGTGGCGGAGAAATATTTTTCATCAGCTAC        |
| Rv_V584K   | GTAGCTGATGAAAAATATTTCTCCGCCACTCGGTGTCG        |
| Fw_V584L   | CATCGTGTGCCGAAGTGTATTTTAGCAGTG                |
| Rv_V584L   | CACTGCTAAAATACAGTTCGGCAACACGATG               |
| Fw_V584N   | GACACCGAGTGGCGGAGAATTATTTTTCATCAGCTAC         |
| Rv_V584N   | GTAGCTGATGAAAAATAATTCTCCGCCACTCGGTGTC         |
| Fw_V584S   | GACACCGAGTGGCGGAGAGCTATTTTTCATCAGCTAC         |
| Rv_V584S   | GTAGCTGATGAAAAATAGCTCTCCGCCACTCGGTGTC         |
| Fw_V584P   | GACACCGAGTGGCGGAGCCGTATTTTTCATCAGCTAC         |
| Rv_V584P   | GTAGCTGATGAAAAATACGGCTCCGCCACTCGGTGTC         |
| Fw_V584H   | CGTCATCGTGTGCCGAACACTATTTTAGCAGTGCAAC         |
| Rv_V584H   | GTTGCACTGCTAAAATAGTGTTCGGCAACACGATGACG        |
| Fw_V584R   | GTCATCGTGTGCCGAAAGGTATTTTAGCAGTGCAAC          |
| Rv_V584R   | GTTGCACTGCTAAAATACCTTTCGGCAACACGATGAC         |
| Fw_S587D   | GTGGCGGAGGTTTATTTTATTTCAGCTACATTTGAACCCG      |
| Rv_S587D   | CGGGTTCAAATGTAGCTGAATCAAATAAACCTCCGCCAC       |
| Fw_S587Y   | GGCGGAGGTTTATTTTATTTCAGCTACATTTGAACCC         |
| Rv_S587Y   | GGGTTCAAATGTAGCTGAATAAAAATAAACCTCCGCC         |
| Fw_S587K   | GTGGCGGAGGTTTATTTTAAATCAGCTACATTTGAACCC       |
| Rv_S587K   | GGGTTCAAATGTAGCTGATTTAAAATAAACCTCCGCCAC       |
| Fw_S587L   | GTGGCGGAGGTTTATTTCTGTGCTCAGCTACATTTGAACCC     |

|          |                                               |
|----------|-----------------------------------------------|
| Rv_S587L | GGGTTCAAATGTAGCTGACAGAAAATAAACCTCCGCCAC       |
| Fw_S587A | GTTGCCGAAGTGTATTTTGCCAGTGCAACCTTTGAACCG       |
| Rv_S587A | CGGTTCAAAGGTTGCACTGGCAAATACACTTCGGCAAC        |
| Fw_S587G | GTTGCCGAAGTGTATTTTGCCAGTGCAACCTTTGAAC         |
| Rv_S587G | GTTCAAAGGTTGCACTGGCAAATACACTTCGGCAAC          |
| Fw_F602W | CTGCAGGTCCTGTGGGATGATATGGCC                   |
| Rv_F602W | GGCCATATCATCCCACAGGACCTGCAG                   |
| Fw_F602I | GTCTGCAGGTCCTGATCGATGATATGGCC                 |
| Rv_F602I | GGCCATATCATCGATCAGGACCTGCAGAC                 |
| Fw_F602A | GTCTGCAGGTCCTGGCAGATGATATGGCCG                |
| Rv_F602A | CGGCCATATCATCTGCCAGGACCTGCAGAC                |
| Fw_V610H | CAAAATTGGTTGTCTGCAGCACCTGTTTCGATGATATGGC      |
| Rv_V610H | GCCATATCATCGAACAGGTGCTGCAGACAACCAATTTTG       |
| Fw_V610S | CAAAATTGGTTGTCTGCAGAGCCTGTTTCGATGATATGGC      |
| Rv_V610S | GCCATATCATCGAACAGGCTCTGCAGACAACCAATTTTG       |
| Fw_V610F | CAAAATTGGTTGTCTGCAGTTCCTGTTTCGATGATATGG       |
| Rv_V610F | CCATATCATCGAACAGGAACTGCAGACAACCAATTTTG        |
| Fw_V610A | CAAAATTGGTTGTCTGCAGGCCCTGTTTCGATGATATGGCC     |
| Rv_V610A | GGCCATATCATATCATCGAACAGGGCCAGCAGACAACCAATTTTG |
| Fw_V714A | CTTATGCTATATCAGCGGGCCTGGACCGTG                |
| Rv_V714A | CACGGTCCAAGGCCGCTGATATAGCATAAG                |
| Fw_V714I | GACTTATGCTATATCAATTGGCCTTGACCGTGAC            |
| Rv_V714I | GTACACGGTCCAAGGCCAATTGATATAGCATAAGTC          |
| Fw_V714T | GAAAACCTATGCAATTAGCACCGGTCTGGGTCCGTGTACC      |
| Rv_V714T | GGTACACGGACCCAGACCGGTGCTAATTGCATAGGTTTTC      |
| Fw_V714G | GAAAACCTATGCAATTAGCGGCGGTCTGGGTCCGTGTACCC     |
| Rv_V714G | GGGTACACGGACCCAGACCGCCGCTAATTGCATAGGTTTTC     |
| Fw_V714P | GACTTATGCTATATCACCGGGCCTTGACCGTGAC            |
| Rv_V714P | GTACACGGTCCAAGGCCGCTGATATAGCATAAGTC           |
| Fw_G715A | CTTATGCTATATCAGTAGCGCTTGACCGGTGACCTAC         |
| Rv_G715A | GTAGGGTACACGGTCCAAGCGCTACTGATATAGCATAAG       |
| Fw_G715S | CTTATGCTATATCAGTAAGCCTTGACCGGTGAC             |
| Rv_G715S | GTACACGGTCCAAGGCTTACTGATATAGCATAAG            |
| Fw_S713T | CTTAAAGACTTATGCTATAACAGTAGGCCTTGACCGTG        |
| Rv_S713T | CACGGTCCAAGGCTACTGTTATAGCATAAGTCTTTAAG        |
| Fw_S713A | CTTAAAGACTTATGCTATAGCGGTAGGCCTTGACCGGTGAC     |
| Rv_S713A | GTACACGGTCCAAGGCTACCCTATAGCATAAGTCTTTAAG      |
| Fw_S713L | CTTAAAGACTTATGCTATACTGGTAGGCCTTGACCGGTGAC     |
| Rv_S713L | GTACACGGTCCAAGGCTACCAGTATAGCATAAGTCTTTAAG     |
| Fw_W753H | GAACTGGTAAGCCTGAGCCACCGTCTGACCAATGATACC       |
| Rv_W753H | GGTATCATTGGTCAGACGGTGGCTCAGGCTTACCAGTTC       |
| Fw_W753L | GGTAAGCCTGAGCTGCGTCTGACCAATG                  |
| Rv_W753L | CATTGGTCAGACGCAAGCTCAGGCTTACC                 |



|          |                                                 |
|----------|-------------------------------------------------|
| Fw_W753V | CTGGTAAGCCTGAGCGTGCCTGACCAATG                   |
| Rv_W753V | CATTGGTCAGACGCACGCTCAGGCTTACCAG                 |
| Fw_W753E | GAGCTTGATCCTTGAGCGAACGACTAACAAACGACAC           |
| Rv_W753E | GTGTCGTTTGTAGTCGTTTCGCTCAAGGATACAAGCTC          |
| Fw_W753C | GTATCCTTGAGCTGCCGACTAACAAACGAC                  |
| Rv_W753C | GTCGTTTGTAGTCGGCAGCTCAAGGATAC                   |
| Fw_W753A | GAAGTGGTAAGCCTGAGCGCACGCTGACCAATGATAC           |
| Rv_W753A | GTATCATTGGTCAGACGTGCGCTCAGGCTTACCAGTTC          |
| Fw_C830A | CCTTTATCTTTAATCTGCGTCTGGCCGTGCAGATCTTCTATAAATTC |
| Rv_C830A | GAATTTATAGAAGATCTGCACGGCCAGACGCAGATTAAGATAAAGG  |
| Fw_C830S | CTTTATCTTTAATCTGCGTCTGAGCGTGCAGATCTTCTATAAATTC  |
| Rv_C830S | GAATTTATAGAAGATCTGCACGCTCAGACGCAGATTAAGATAAAG   |
| Fw_F834A | CTTAGATTGTGTGCCAAATCGCCTACAAGTTTATAGATGGGTAC    |
| Rv_F834A | GTACCCATCTATAAACTTGTAGGCGATTTGGACACACAATCTAAG   |
| Fw_F834G | CTTAGATTGTGTGCCAAATCGGCTACAAGTTTATAGATGGGTAC    |
| Rv_F834G | GTACCCATCTATAAACTTGTAGCCGATTTGGACACACAATCTAAG   |
| Fw_F834Y | GATTGTGTGTCCAAATCTACTACAAGTTTATAGATGG           |
| Rv_F834Y | CCATCTATAAACTTGTAGTAGATTTGGACACACAATC           |
| Fw_F834H | CGTCTGTGCGTGCAGATCCACTATAAATTCATTGATG           |
| Rv_F834H | CATCAATGAATTTATAGTGGATCTGCACGCACAGACG           |
| Fw_Y835F | GTGTGTCCAAATCTTTTTAAGTTTATAGATGGGTAC            |
| Rv_Y835F | GTACCCATCTATAAACTTAAAAAAGATTTGGACACAC           |
| Fw_Y835W | GTGTGTCCAAATCTTTTGAAGTTTATAGATGGGTAC            |
| Rv_Y835W | GTACCCATCTATAAACTTCCAAAAGATTTGGACACAC           |
| Fw_Y835A | GATTGTGTGTCCAAATCTTTGCGAAGTTTATAGATGGGTACG      |
| Rv_Y835A | CGTACCCATCTATAAACTTCGCAAAGATTTGGACACACAATC      |
| Fw_Y841A | CTATAAATTCATTGATGGTGCCGGCATTGCCAACGAAGAG        |
| Rv_Y841A | CTCTTCGTTGGCAATGCCGGCACCATCAATTTATAG            |
| Fw_Y841F | CTATAAATTCATTGATGGTTTCGGCATTGCCAACGAAGAG        |
| Rv_Y841F | CTCTTCGTTGGCAATGCCGAAACCATCAATGAATTTATAG        |
| Fw_Y841T | CTATAAATTCATTGATGGTACCGGCATTGCCAACGAAGAG        |
| Rv_Y841T | CTCTTCGTTGGCAATGCCGGTACCATCAATGAATTTATAG        |
| Fw_Y89F  | GTCTGAGCGCAAATTTTCATGGTGATCTGTG                 |
| Rv_Y89F  | CACAGATCACCATGAAAATTTGCGCTCAGAC                 |
| Fw_Y89A  | ACTCTCCGCAATGCGCATGGCGATCTGTG                   |
| Rv_Y89A  | CACAGATCGCCATGCGCATTGGCGGAGAGT                  |
| Fw_Y89E  | CGACTCTCCGCAATGAGCATGGCGATCTGTG                 |
| Rv_Y89E  | CACAGATCGCCATGCTCATTGGCGGAGAGTCG                |

Table S5: Mutagenesis Primer

CCATGGATGAGTTTTGATATTGCCAAATACCCGACCCTGGCACTGGTCTGACTCCACCCAGGAGTT  
ACGACTGTTGCCGAAAGAGAGTTTACCGAAACTCTGCGACGAACTGCGCCGCTATTTACTCGACA  
GCGTGAGCCGTTCCAGCGGGCACTTCGCCTCCGGGCTGGGCACGGTCGAACTGACCGTGGCGC  
TGCACTATGTCTACAACACCCCGTTTGACCAATTGATTTGGGATGTGGGGCATCAGGCTTATCCG  
CATAAAATTTTGACCGGACGCCGCGACAAAATCGGCACCATCCGTCAGAAAGGCGGCCTGCACC  
CGTCCCCTGGCGCGCGCAAAGCGAATATGACGTATTAAGCGTCGGGCATTCATCAACCTCCAT  
CAGTGCCGGAATTGGTATTGCGGTTGCTGCCGAGAAAGAAGGCAAAAATCGCCGCACCGTCTGT  
GTCATTGGCGATGGCGCGATTACCGCTGGCATGGCGTTTGAAGCGATGAATCACGCGGGCGATA  
TCCGTCCTGATATGCTGGTGGTCCTCAACGACAATGAAATGTGATTTCCGAAAATGTGCGCGCG  
CTCAATAACCATCTGGCACAGCTGCTTTCCGTAAGCTTTACTCTTCGCTGCGCGAAGGCGGGAA  
AAAAGTTTTCTCTGGCGTTCCGCCAATTAAGAGCTGCTCAAACGTACCGAAGAACATATTAAGG  
CATGGTAGTGCCTGGCACGTTGTTTGAAGAGCTGGGCTTTAACTACATCGGCCCGGTTGACGGT  
CACGATGTGCTGGGGCTTATCACCACGCTGAAGAACATGCGCGACCTGAAAGGCCCGCAGTTCC  
TGCATATCATGACCAAAAAAGGTCGTGGTTATGAACCGGCAGAAAAAGACCCCATCACTTTCCAC  
GCCGTGCCTAAATTTGATCCCTCCAGCGGTTGTTTGCCGAAAAGTAGCGGCGGTTTGGCGAGCT  
ATTCAAAATCTTTGGCGACTGGTTGTGCGAAACGGCAGCGAAAGACAACAAGCTGATGGCGATT  
ACTCCGGCGATGCGTGAAGGTTCCGGCATGGTCGAGTTTTACGTAATTCCTGGATCGTTACTT  
CGACGTGGCAATCGCCGAGCAACACGCGGTGACCTTTGCCGCCGGTCTGGCGATTGGTGGGTA  
CAAACCCATTGTCGCGATTTACTCCACTTTCTGCAACGCGCCTATGATCAGGTGCTGCATGACG  
TGGCGATTCAAAGCTCCCGTCTGTTCCGATCGACCGCGCGGGCATTGTTGGTGTGACGG  
TCAAACCCATCAGGGCGCTTTTGACCTCTTTACCTGCGCTGTATACCGGAAATGGTCATTATGA  
CCCCGAGCGATGAAAACGAATGTGCCAGATGCTCTATACCGGCTATCACTATAACGACGGCCC  
GTCCGCGGTGCGCTACCCGCGCGGTAACGCGGTTGGCGTGGAAGTACGCGCTGGAAAACT  
GCCAATTGGCAAAGGCATTGTGAAGCGTCGTGGCGAGAACTGGCGATCCTTAACTTTGGTACG  
CTGATGCCAGACGCGGCGAAAGTCGCTGAATCGCTGAACGCTACGCTGGTCGATATGCGTTTTG  
TGAAACCGCTTGATGAAGCGTTAATTCTGGAAATGGCCGCCAGCCATGAAGCGCTGGTCACCGT  
AGAAGAAAACGCCATTATGGGCGGCGCAGGCAGCGGCGTGAACGAAGTGCTAATGGCCCATCG  
TAAACCAGTACCCGTGCTGAACATTGGCCTGCCTGACTTCTTTATTCCACAAGGAACTCAGGAAG  
AAATGCGCGCCGAACTCGGCCTCGATGCCGCCGGTATGGAAGCCAAAATCAAGGCCTGGCTGG  
CATAAGAATTC

**Gene of 1-deoxy-D-xylulose 5-phosphate synthase (*dxs*)**

CATATGAAGCAACTCACCATTCTGGGCTCGACCGGCTCGATTGGTTGCAGCACGCTGGACGTGG  
TGCGCCATAATCCCGAACACTTCCGCGTAGTTGCGCTGGTGGCAGGCAAAAATGTCACTCGCAT  
GGTAGAACAGTGCCTGGAATTCTCTCCCCGCTATGCCGTAATGGACGATGAAGCGAGTGCGAAA  
CTTCTTAAAACGATGCTACAGCAACAGGGTAGCCGCACCGAAGTCTTAAGTGGGCAACAAGCCG  
CTTGCGATATGGCAGCGCTTGAGGATGTTGATCAGGTGATGGCAGCCATTGTTGGCGCTGCTGG  
GCTGTTACCTACGCTTGCTGCGATCCGCGCGGGTAAAACCATTTTTGCTGGCCAATAAAGAATCAC  
TGGTTACCTGCGGACGTCTGTTTATGGACGCCGTAAAGCAGAGCAAAGCGCAATTGTTACCGGT  
CGATAGCGAACATAACGCCATTTTTCAGAGTTTACCGCAACCTATCCAGCATAATCTGGGATACG  
CTGACCTTGAGCAAAAATGGCGTGGTGTCCATTTTACTTACCGGGTCTGGTGGCCCTTTCCGTGAG  
ACGCCATTGCGCGATTTGGCAACAATGACGCCGGATCAAGCCTGCCGTCATCCGAACTGGTCGA  
TGGGGCGTAAAATTTCTGTGATTCCGGCTACCATGATGAACAAAGGTCTGGAATACATTGAAGCG  
CGTTGGCTGTTTAAACGCCAGCGCCAGCCAGATGGAAGTGCTGATTCACCCGCAGTCAGTGATTC  
ACTCAATGGTGCGCTATCAGGACGGCAGTGTCTGGCGCAGCTGGGGGAACCGGATATGCGTAC  
GCCAATTGCCACACCATGGCATGGCCGAATCGCGTGAACCTCTGGCGTGAAGCCGCTCGATTTT  
TGCAAACCTAAGTGCGTTGACATTTGCCGCACCGGATTATGATCGTTATCCATGCCTGAAACTGGC  
GATGGAGGCGTTTGAACAAGGCCAGGCAGCGACGACAGCATTGAATGCCGCAAACGAAATCACC  
GTTGCTGCTTTTCTTGCGCAACAAATCCGCTTACGGATATCGCTGCGTTGAATTTATCCGTA CTG  
GAAAAATGGATATGCGCGAACCAACAATGTGTGGACGATGTGTTATCTGTTGATGCGAACGCGCG  
TGAAGTCGCCAGAAAAGAGGTGATGCGTCTCGCAAGCTGACTCGAG

**Gene of 1-deoxy-D-xylulose 5-phosphate reductoisomerase (*dxr*)**

CCATGGATGGCAACCACTCATTGGATGTTTGCGCCGTGGTTCCGGCGGCCGATTTGGCCGTC  
GAATGCAAACGGAATGTCTAAGCAATATCTCTCAATCGGTAATCAAACCATTCTTGAACACTCGG  
TGCATGCGCTGCTGGCGCATCCCCGGGTGAAACGTGTCGTCATTGCCATAAGTCCTGGCGATAG  
CCGTTTTGCACAACTTCCTCTGGCGAATCATCCGCAAATCACCGTTGTAGATGGCGGTGATGAGC  
GTGCCGATTCCGTGCTGGCAGGTTTCAAAGCCGCTGGCGACGCGCAGTGGGTATTGGTGCATG  
ACGCCGCTCGTCCTTGTCTGCATCAGGATGACCTCGCGCGATTGTTGGCGTTGAGCGAAACCAG  
CCGCACGGGAGGGATCCTAGCCGCACCAGTGCGCGATACGATGAAACGTGCCGAACCGGGCAA  
AAATGCCATTGCTCATACCGTTGATCGCAACGGCTTATGGCACGCGCTGACGCCGCAATTTTTCC  
CTCGTGAGCTGTTACATGACTGTCTGACGCGCGCTCTAAATGAAGGCGCGACTATTACCGACGAA  
GCCTCGGCGCTGGAATATTGCGGATTCCATCCTCAGTTGGTGAAGGCCGTGCGGATAACATTA  
AAGTCACGCGCCCGGAAGATTTGGCACTGGCCGAGTTTTACCTCACCCGAACCATCCATCAGGA  
GAATACATAAGCAGGAGCAGGAGCAGAAGGAGGAGCAGGAATGCGAATTGGACACGGTTTTTGAC  
GTACATGCCTTTGGCGGTGAAGGCCCAATTATCATTGGTGGCGTACGCATTCTTACGAAAAGG  
ATTGCTGGCGCATTCTGATGGCGACGTGGCGCTCCATGCGTTGACCGATGCATTGCTTGGCGCG  
GCGGCGCTGGGGGATATCGGCAAGCTGTTCCCGGATACCGATCCGGCATTAAAGGTGCCGAC  
AGCCGCGAGCTGCTACGCGAAGCCTGGCGTCGTATTACGGCGAAGGGTTATACCCTGGGCAAC  
GTCGATGTCACTATCATCGCTCAGGCACCGAAGATGTTGCCGCACATTCCACAAATGCGCGTATT  
TATTGCCGAAGATCTCGGCTGCCATATGGATGATGTTAACGTGAAAGCCACTACTACGGAAAAC  
TTGGATTTACCGGACGTGGGGAAGGGATTGCCTGTGAAGCGGTGGCGCTACTCATTAAAGGCAAC  
AAAATGAGAATTC

**Gene of bi-cistronic *ispD/ispF***

Bi-cistronic operon of 2-C-methyl-D-erythriol 4-phosphate cytidyltransferase synthase (*ispD*) 2-C-methyl-D-erythritol 2,4-cyclodiphosphate synthase (*ispF*)

CATATGCAAACGGAACACGTCATTTTATTGAATGCACAGGGAGTTCCACGGGTACGCTGGAAAA  
GTATGCCGCACACACGGCAGACACCCGCTTACATCTCGCGTTCTCCAGTTGGCTGTTTAATGCCA  
AAGGACAATTATTAGTTACCCGCCGCGCACTGAGCAAAAAAGCATGGCCTGGCGTGTGGACTAA  
CTCGGTTTGTGGGCACCCACAACCTGGGAGAAAGCAACGAAGACGCAGTGATCCGCCGTTGCCGT  
TATGAGCTTGGCGTGGAAATTACGCCTCCTGAATCTATCTATCCTGACTTTTCGCTACCGCGCCAC  
CGATCCGAGTGGCATTGTGGAAAATGAAGTGTGTCCGGTATTTGCCGCACGCACCACTAGTGCG  
TTACAGATCAATGATGATGAAGTGTGGATTATCAATGGTGTGATTTAGCAGATGTATTACACGGT  
ATTGATGCCACGCCGTGGGCGTTCAGTCCGTGGATGGTGTGATGCAGGCGACAAATCGCGAAGCCA  
GAAAACGATTATCTGCATTTACCCAGCTTAAATAACTCGAG

**Gene of Isopentenyl-diphosphate delta isomerase (*idi*)**

CATATGGCAATGAGCAGCAGCACCGGCACCAGCAAAGTTGTTAGCGAAACCAGCAGTACCATTG  
TTGATGATATTCCGCGTCTGAGCGCAAATTATCATGGTGTCTGTGGCATCATAATGTGATTCAGA  
CCCTGGAAACCCCGTTTTCGTGAAAGCAGCACCTATCAAGAACGTGCAGATGAACTGGTTGTGAAA  
ATCAAAGATATGTTAACGCACTGGGTGATGGTGTATATTAGCCCGAGCGCCTATGATACCGCATG  
GGTTGCACGTCTGGCAACCATTAGCAGTGTGGTAGCGAAAAACCGCGTTTTCCGCAGGCACTG  
AATTGGGTTTTTAAACAATCAGCTGCAGGATGGTAGTTGGGGTATTGAAAGCCATTTTAGCCTGTGT  
GATCGTCTGCTGAATACCACCAATAGCGTTATTGCACTGAGCGTTTGGAAAACCGGTCATAGCCA  
GGTTCAGCAGGGTGCAGAATTTATTGCAGAAAATCTGCGCCTGCTGAATGAAGAAGATGAGCTGA  
GTCCGGATTTTCAGATTATCTTTCCGGCACTGCTGCAGAAAGCAAAGCACTGGGTATTAATCTG  
CCGTATGATCTGCCGTTTATCAAATATCTGAGCACCACCCGTGAAGCACGTCTGACCGATGTTAG  
CGCAGCAGCAGATAATATTCCGGCAAATATGCTGAATGCACTGGAAGGTCTGGAAGAAGTTATTG  
ACTGGAACAAAATTATGCGCTTCCAGAGCAAAGATGGTAGCTTTCTGAGTAGTCCGGCAAGCACC  
GCATGTGTTCTGATGAATACCGGTGATGAAAATGCTTTACCTTCTGAATAACCTGCTGGATAAA  
TTTGGTGGTTGTGTTCCGTGTATGTATAGCATTGATCTGCTGGAACGTCTGAGCCTGGTTGATAAT  
ATTGAACATCTGGGTATTGGTCGCCACTTCAAACAAGAAATTAAGGTGCACTGGATTACGTGTAT  
CGTCATTGGAGCGAACGTGGTATTGGTTGGGGTTCGTGATAGCCTGGTTCCGGATCTGAATACAA  
CCGCACTGGGCCTGCGTACCCTGCGTATGCATGGTTATAATGTTAGCTCAGATGTGCTGAACAAC  
TTTAAAGATGAAAACGGTCGCTTTTTTTAGCAGCGCAGGTGAGACCCATGTTGAACTGCGTAGCGT  
TGTTAACCTGTTTTCGTGCAAGCGATCTGGCATTTCGGATGAACGTGCAATGGATGATGCACGTA

AATTTGCAGAACCGTATCTGCGTGAAGCCCTGGCCACCAAATTAGCACCAATACAAAACCTGTTTA  
AAGAAATCGAATATGTGGTTCGAGTATCCGTGGCACATGAGCATTCCCTCGTCTGGAAGCACGTAGC  
TATATTGATAGCTATGATGATAACTATGTGTGGCAGCGTAAAACCCTGTATCGTATGCCGAGCCTG  
AGCAATAGCAAATGTCTGGAACCTGGCAAAAACCTGGATTTTAACATTGTTTCAGAGCCTGCACCAAGA  
AGAACTGAAACTGCTGACCCGTTGGTGGAAAGAAAGCGGTATGGCAGATATTAACCTTTACCCGTC  
ATCGTGTTGCCGAAGTGTATTTTAGCAGTGCAACCTTTGAACCGGAATATAGCGCAACCCGTATT  
GCCTTTACCAAATTGGTTGTCTGCAGGTCCTGTTTCGATGATATGGCCGATATTTTTGCAACCCTG  
GATGAACTGAAAAGTTTTACCGAAGGTGTTAAACGTTGGGATACCAGTCTGCTGCATGAAATCCC  
GGAATGTATGCAGACCTGTTTTAAAGTGTGGTTTTAACTGATGGAAGAGGTGAATAACGATGTGG  
TTAAAGTTCAGGGTCGCGATATGCTGGCCCATATTCGTAAACCGTGGGAACTGTATTTCAACTGC  
TATGTTCAAGAACGCGAATGGCTGGAAGCCGGTTATATTCCGACCTTTGAAGAATATCTGAAAAC  
CTATGCAATTAGCGTTGGTCTGGGTCCGTGTACCCTGCAGCCGATTCTGCTGATGGGTGAACTG  
GTGAAAGATGATGTTGTTGAGAAAGTTCATTACCCGAGCAACATGTTTGAACCTGGTAAGCCTGAG  
CTGGCGTCTGACCAATGATACCAAACCTATCAGGCAGAAAAGCACGTGGTCAGCAGGCAAGC  
GGTATTGCATGTTATATGAAAGACAATCCGGGTGCAACCGAAGAGGATGCAATCAAACATATTTG  
TCGTGTTGTTGATCGTGCCTGAAAGAAGCCAGCTTTGAATATTTCAAACCGAGCAACGATATTCC  
GATGGGCTGTAAATCCTTTATCTTTAATCTGCGTCTGTGCGTGCAGATCTTCTATAAATTCATTGAT  
GGTTACGGCATTGCCAACGAAGAGATCAAAGATTATATCCGCAAAGTGTATATCGATCCGATTCA  
GGTTTAACTCGAG

**Gene of the M60 truncation of TXS (*txs*)**

## References

- 1 Williams, D. C. *et al.* Heterologous expression and characterization of a "Pseudomature" form of taxadiene synthase involved in paclitaxel (Taxol) biosynthesis and evaluation of a potential intermediate and inhibitors of the multistep diterpene cyclization reaction. *Archives of biochemistry and biophysics* **379**, 137-146, doi:10.1006/abbi.2000.1865 (2000).
- 2 Whittington, D. A. *et al.* Bornyl diphosphate synthase: structure and strategy for carbocation manipulation by a terpenoid cyclase. *Proceedings of the National Academy of Sciences of the United States of America* **99**, 15375-15380, doi:10.1073/pnas.232591099 (2002).
- 3 Jin, Y., Williams, D. C., Croteau, R. & Coates, R. M. Taxadiene synthase-catalyzed cyclization of 6-fluorogeranylgeranyl diphosphate to 7-fluorovercillenes. *Journal of the American Chemical Society* **127**, 7834-7842, doi:10.1021/ja050592r (2005).
- 4 Meguro, A. *et al.* An Unusual Terpene Cyclization Mechanism Involving a Carbon-Carbon Bond Rearrangement. *Angewandte Chemie*, doi:10.1002/anie.201411923 (2015).
- 5 Meguro, A. *et al.* An unusual terpene cyclization mechanism involving a carbon-carbon bond rearrangement. *Angewandte Chemie* **54**, 4353-4356, doi:10.1002/anie.201411923 (2015).
- 6 Hong, Y. J. & Tantillo, D. J. The energetic viability of an unexpected skeletal rearrangement in cyclooctatin biosynthesis. *Organic & biomolecular chemistry*, doi:10.1039/c5ob01785h (2015).
- 7 Görner, C. H., I. Schrepfer, P. Eisenreich, W. Brück, T. Targeted Engineering of Cyclooctat-9-en-7-ol Synthase: AStereospecific Access to Two New Non-naturalFusicoccane-Type Diterpenes. *ChemCatChem* **5**, 3289-3298, doi:10.1002/c ctc.201300285 (2013).
- 8 Janke, R., Gorner, C., Hirte, M., Bruck, T. & Loll, B. The first structure of a bacterial diterpene cyclase: CotB2. *Acta crystallographica. Section D, Biological crystallography* **70**, 1528-1537, doi:10.1107/S1399004714005513 (2014).
- 9 Meguro, A., Tomita, T., Nishiyama, M. & Kuzuyama, T. Identification and characterization of bacterial diterpene cyclases that synthesize the cembrane skeleton. *Chembiochem : a European journal of chemical biology* **14**, 316-321, doi:10.1002/cbic.201200651 (2013).
- 10 Hong, Y. J. & Tantillo, D. J. The taxadiene-forming carbocation cascade. *Journal of the American Chemical Society* **133**, 18249-18256, doi:10.1021/ja2055929 (2011).
